# Supplementary material for: Catalytic Enantioselective Synthesis of N-C Axially Chiral N-(2,6-Disubstituted-phenyl)sulfonamides through Chiral Pd-Catalyzed N-Allylation
Source: MDPI journal article supplement (doi:10.3390/molecules27227819), 2022-11-13
Supplement: s1 [file s1]

## Supplementary Materials

# Catalytic Enantioselective Synthesis of N-C Axially Chiral Sulfonamides Bearing ortho-disubstituted-Phenyl Groups

Sota Fukasawa,<sup>1</sup> Tatsuya Toyoda,<sup>1</sup> Ryohei Kasahara,<sup>1</sup> Chisato Nakamura,<sup>1</sup> Yuuki Kikuchi,<sup>1</sup> Akiko Hori,<sup>2</sup> Gary J. Richards<sup>2</sup> and Osamu Kitagawa<sup>\*1</sup>

<sup>1</sup>Department of Applied Chemistry (Japanese Association of Bio-intelligence for Well-being), Shibaura Institute of Technology, 3-7-5 Toyosu, Kohto-ku, Tokyo 135-8548, Japan.

<sup>2</sup>Graduate School of Engineering and Science, Shibaura Institute of Technology, 307 Fukasaku, Minuma-ku, Saitama 337-8570, Japan.

\*Correspondence: kitagawa@shibaura-it.ac.jp; Tel.: +81-3-5859-8161 (O.K.)

### (Contents)

|                                                                                       |         |
|---------------------------------------------------------------------------------------|---------|
| Copies of <sup>1</sup> H- and <sup>13</sup> C-NMR chart of all compounds <b>1-6</b>   | S2-S44  |
| Chiral HPLC chart for the determination of the ee                                     | S45-S64 |
| X-ray crystal data of <b>2o</b>                                                       | S65-S68 |
| Kinetic data for the evaluation of the rotational barriers of <b>2i</b> and <b>2r</b> | S69     |

# Copies of $^1\text{H}$ - and $^{13}\text{C}$ -NMR spectra

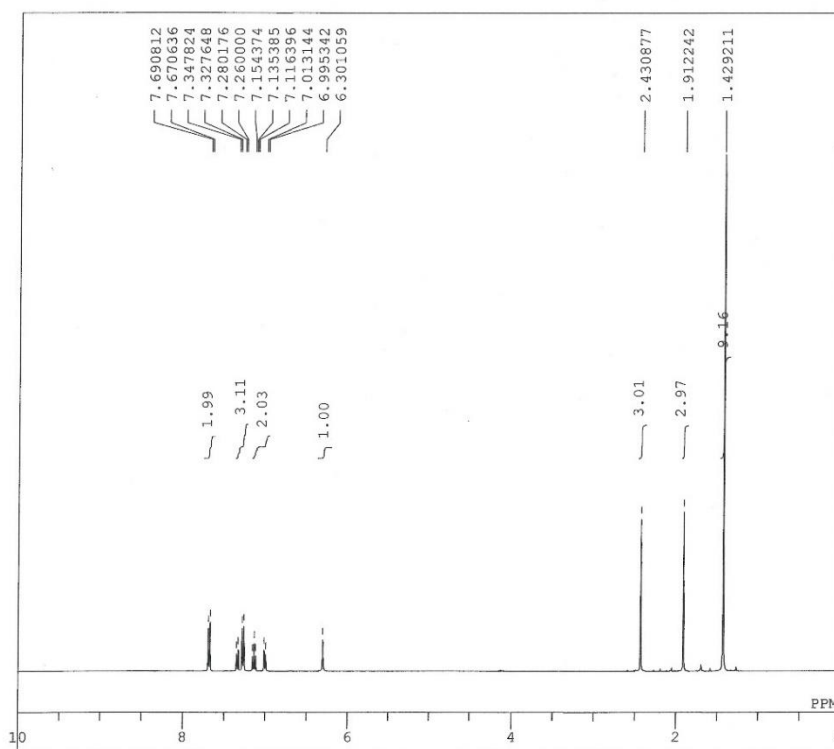

```

DFILE SF131 20210916-1.als
COMNT Qn-BOC 1H
DATIM 2021-09-16 14:24:05
OBNUC 1H
EXMOD single_pulse.ex2
OBFRQ 399.78 MHz
OBSET 4.62 KHz
OBFIN 5.98 Hz
POINT 13107
FREQU 6218.81 Hz
SCANS 32
ACQTM 2.1076 sec
PD 5.0000 sec
PW1 5.17 usec
IRNUC 1H
CTEMP 18.8 c
SLVNT CDCL3
EXREF 7.26 ppm
BF 0.12 Hz
RGAIN 30
    
```

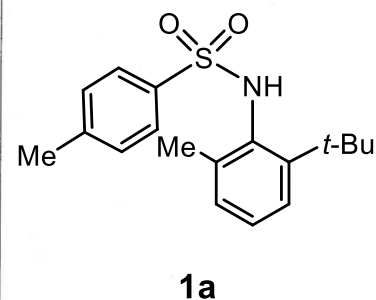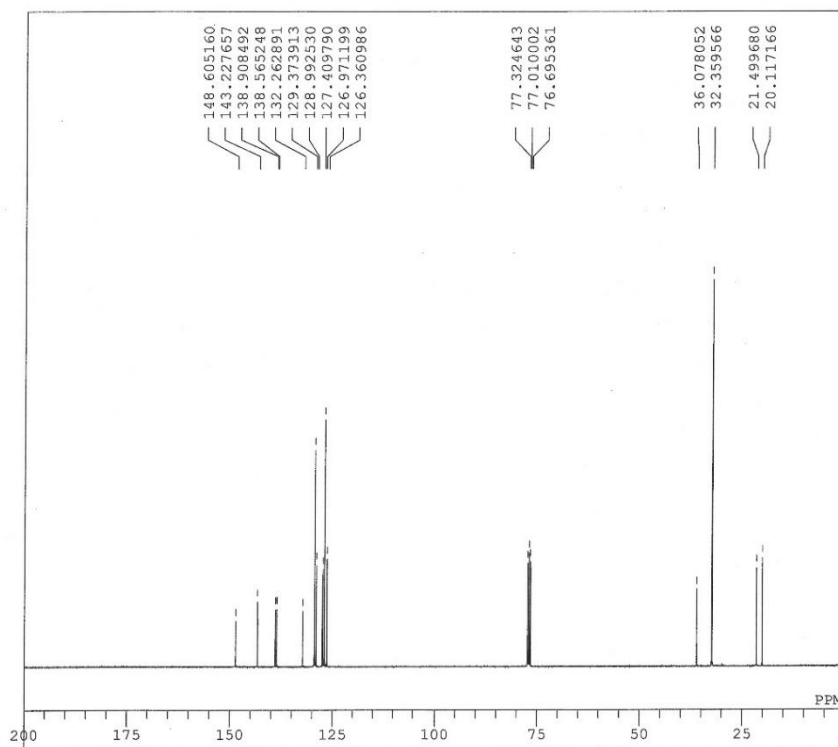

```

DFILE SF131-13C 20211008-1.als
COMNT 
DATIM 2021-10-08 09:19:14
OBNUC 13C
EXMOD single_pulse_dec
OBFRQ 100.53 MHz
OBSET 5.35 KHz
OBFIN 5.86 Hz
POINT 32768
FREQU 31407.03 Hz
SCANS 1024
ACQTM 1.0433 sec
PD 2.0000 sec
PW1 3.03 usec
IRNUC 1H
CTEMP 18.7 c
SLVNT CDCL3
EXREF 77.01 ppm
BF 1.20 Hz
RGAIN 60
    
```

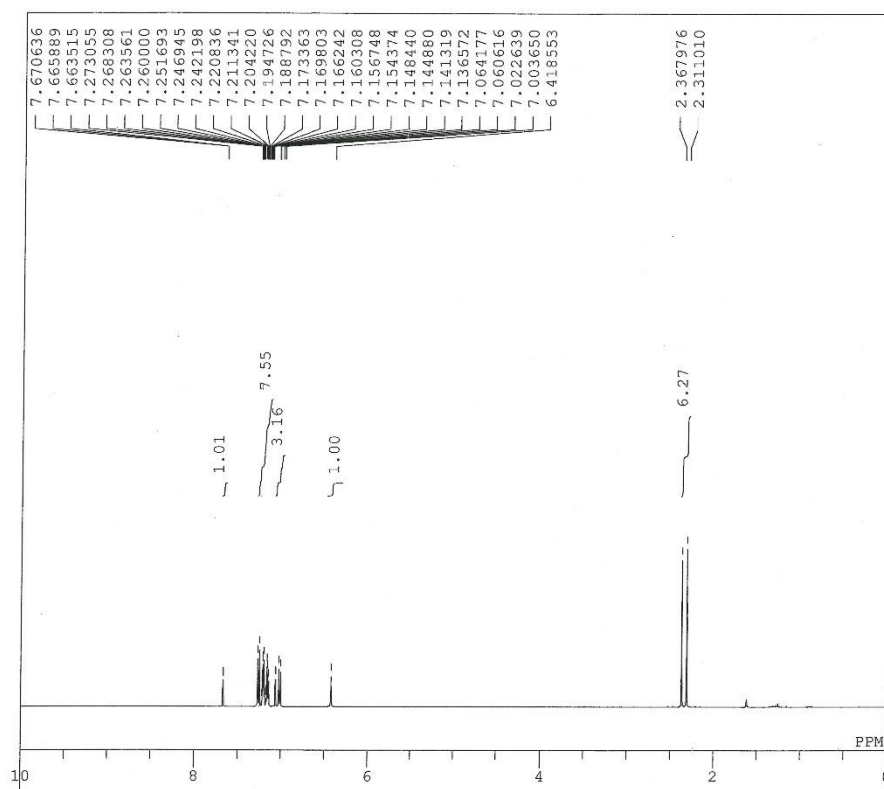

DFILE RK031 20211214-1.als  
 COMNT Qn-BOC 1H  
 DATIM 2021-12-14 11:23:11  
 OBNUC 1H  
 EXMOD single\_pulse.ex2  
 OBFRQ 399.78 MHz  
 OBSET 4.62 KHz  
 OBFIN 5.98 Hz  
 POINT 16384  
 FREQU 7773.63 Hz  
 SCANS 32  
 ACQTM 2.1076 sec  
 PD 5.0000 sec  
 PW1 5.80 usec  
 IRNUC 1H  
 CTEMP 17.5 c  
 SLVNT CDCL3  
 EXREF 7.26 ppm  
 BF 0.12 Hz  
 RGAIN 30

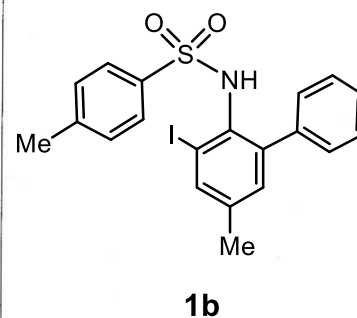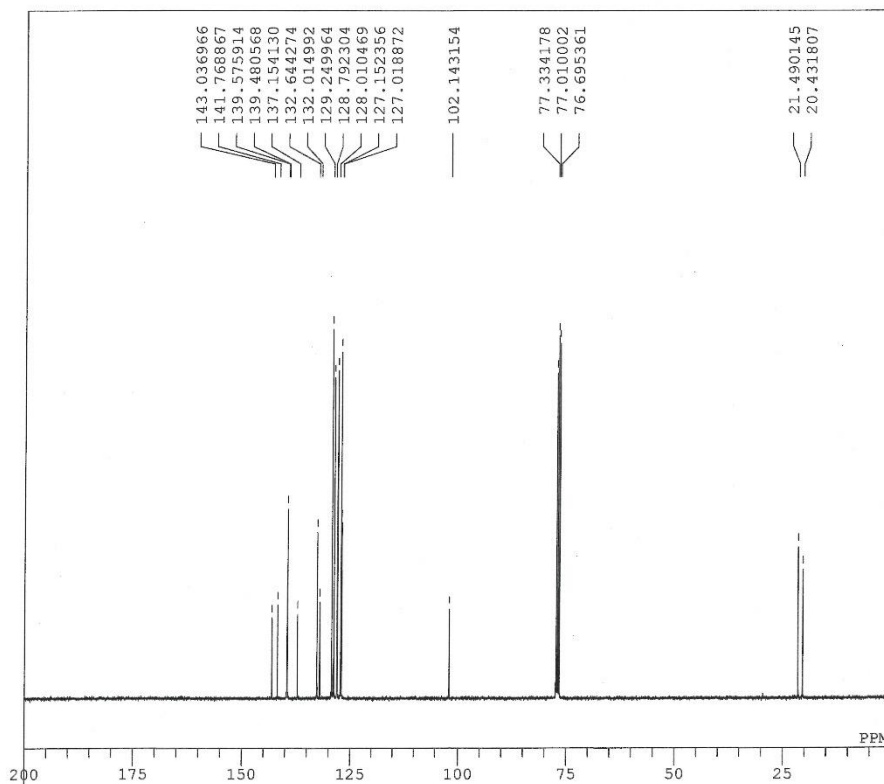

DFILE SF068-13C 20211005-1.als  
 COMNT  
 DATIM 2021-10-05 09:40:09  
 OBNUC 13C  
 EXMOD single\_pulse\_dec  
 OBFRQ 100.53 MHz  
 OBSET 5.35 KHz  
 OBFIN 5.86 Hz  
 POINT 32768  
 FREQU 31407.03 Hz  
 SCANS 1024  
 ACQTM 1.0433 sec  
 PD 2.0000 sec  
 PW1 3.03 usec  
 IRNUC 1H  
 CTEMP 19.0 c  
 SLVNT CDCL3  
 EXREF 77.01 ppm  
 BF 1.20 Hz  
 RGAIN 60

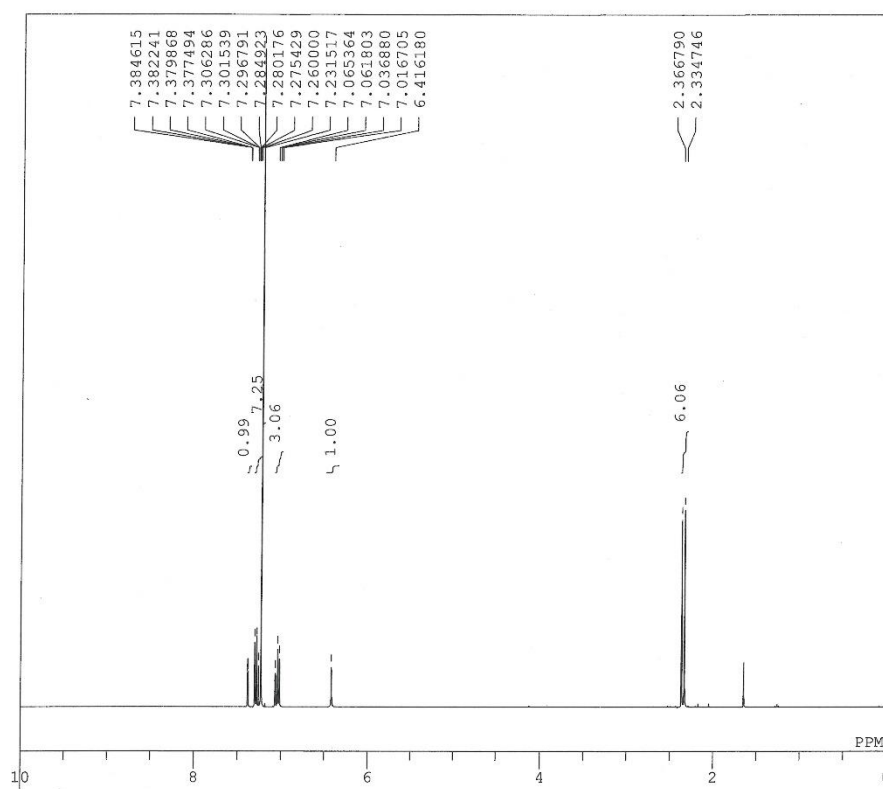

DFILE SF133 20211012-1.als  
 COMNT Qn-BOC 1H  
 DATIM 2021-10-12 12:33:47  
 OBNUC 1H  
 EXMOD single pulse.ex2  
 OBFRQ 399.78 MHz  
 OBSET 4.62 KHz  
 OBFIN 5.98 Hz  
 POINT 13107  
 FREQU 6218.81 Hz  
 SCANS 32  
 ACQTM 2.1076 sec  
 PD 5.0000 sec  
 PW1 5.17 usec  
 IRNUC 1H  
 CTEMP 18.7 c  
 SLVNT CDCL3  
 EXREF 7.26 ppm  
 BF 0.12 Hz  
 RGAIN 34

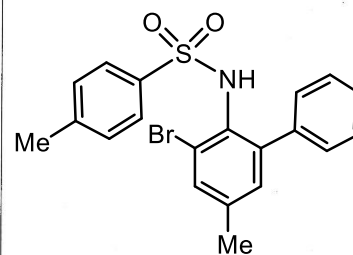

**1c**

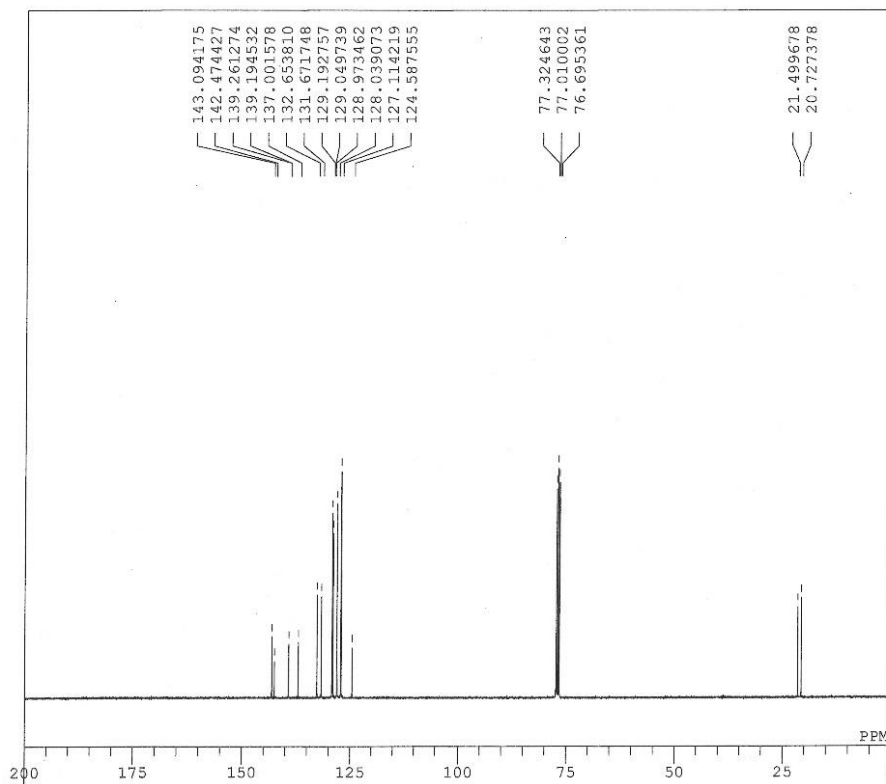

DFILE SF133-13C 20211011-1.als  
 COMNT  
 DATIM 2021-10-11 17:31:11  
 OBNUC 13C  
 EXMOD single pulse\_dec  
 OBFRQ 100.53 MHz  
 OBSET 5.35 KHz  
 OBFIN 5.86 Hz  
 POINT 32768  
 FREQU 31407.03 Hz  
 SCANS 1024  
 ACQTM 1.0433 sec  
 PD 2.0000 sec  
 PW1 3.03 usec  
 IRNUC 1H  
 CTEMP 19.0 c  
 SLVNT CDCL3  
 EXREF 77.01 ppm  
 BF 1.20 Hz  
 RGAIN 60



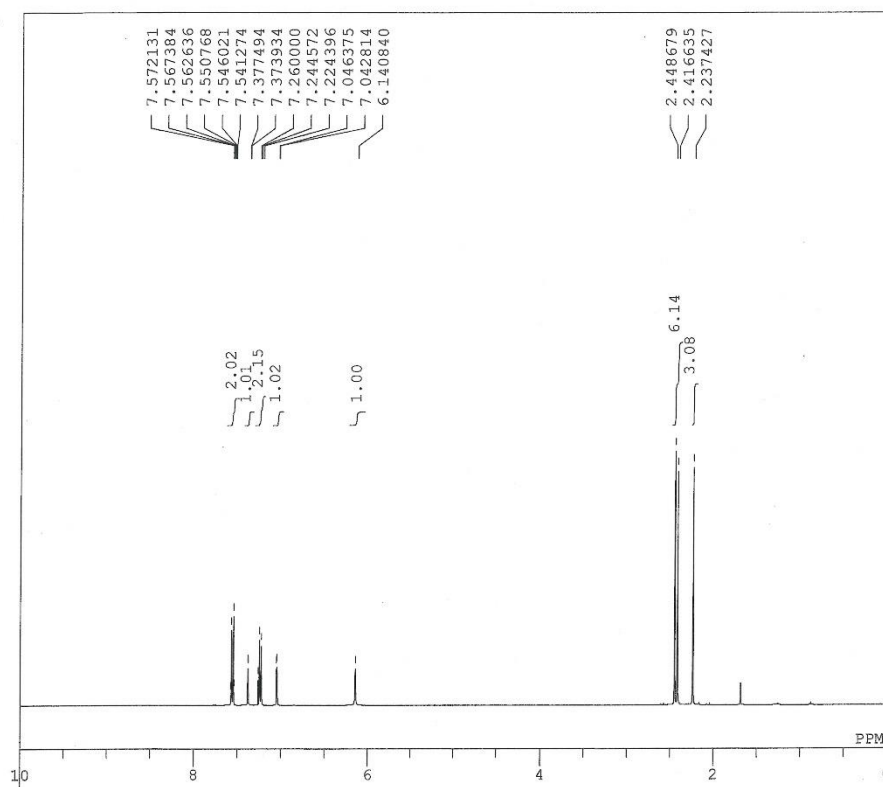

DFILE TT026 20211008-1.als  
 COMNT Qn-BOC 1H  
 DATIM 2021-10-08 13:47:14  
 OBNUC 1H  
 EXMOD single pulse.ex2  
 OBFRQ 399.78 MHz  
 OBSET 4.62 KHz  
 OBFIN 5.98 Hz  
 POINT 16384  
 FREQU 7773.63 Hz  
 SCANS 32  
 ACQTM 2.1076 sec  
 PD 5.0000 sec  
 PW1 5.17 usec  
 IRNUC 1H  
 CTEMP 18.6 c  
 SLVNT CDCL3  
 EXREF 7.26 ppm  
 BF 0.12 Hz  
 RGAIN 30

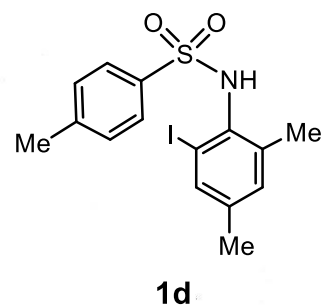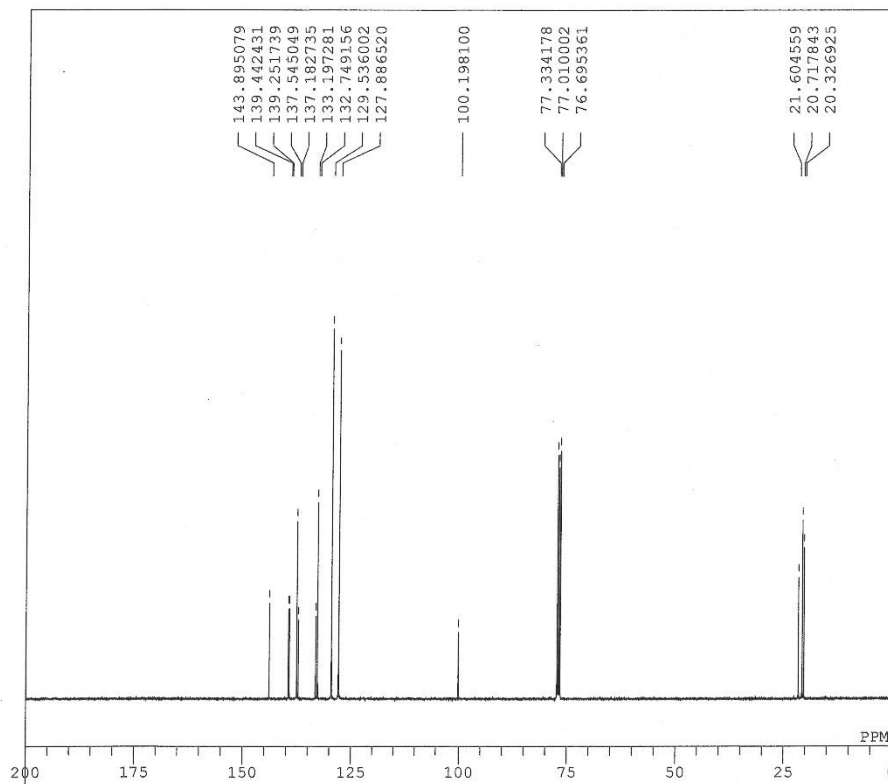

DFILE TT026-13C 20211007-1.als  
 COMNT  
 DATIM 2021-10-07 18:36:27  
 OBNUC 13C  
 EXMOD single pulse dec  
 OBFRQ 100.53 MHz  
 OBSET 5.35 KHz  
 OBFIN 5.86 Hz  
 POINT 32768  
 FREQU 31407.03 Hz  
 SCANS 1024  
 ACQTM 1.0433 sec  
 PD 2.0000 sec  
 PW1 3.03 usec  
 IRNUC 1H  
 CTEMP 18.7 c  
 SLVNT CDCL3  
 EXREF 77.01 ppm  
 BF 1.20 Hz  
 RGAIN 60

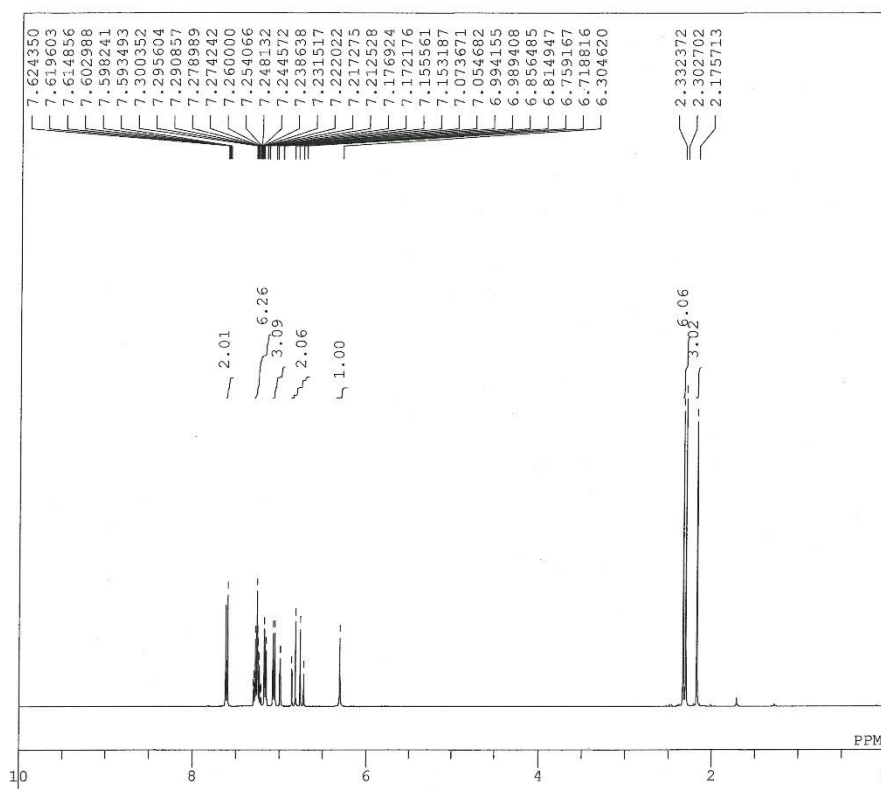

```

DFILE  TT041 20211014-1.als
COMNT  Qn-BOC 1H
DATIM   2021-10-14 15:38:48
OBNUC   1H
EXMOD   single pulse.ex2
OBFRQ   399.78 MHz
OBSET   4.62 KHz
OBFIN   5.98 Hz
POINT   13107
FREQU   6218.81 Hz
SCANS   32
ACQTM   2.1076 sec
PD       5.0000 sec
PW1     5.17 usec
IRNUC   1H
CTEMP   18.3 c
SLVNT   CDCL3
EXREF   7.26 ppm
BF       0.12 Hz
RGAIN   30
  
```

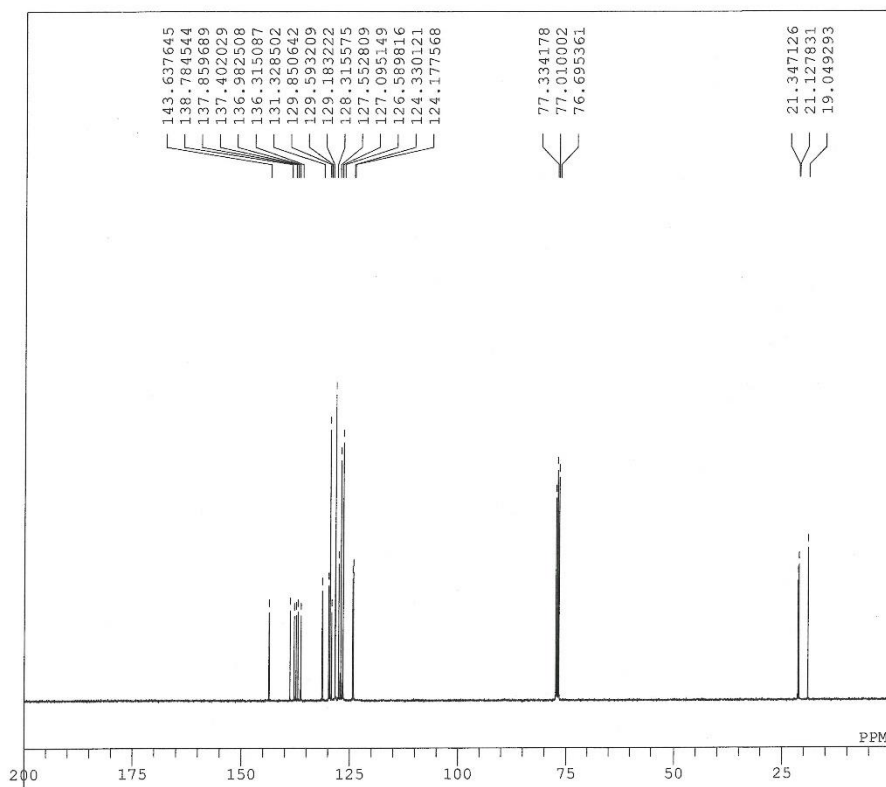

```

DFILE  TT041-13C 20211014-1.als
COMNT
DATIM   2021-10-14 18:10:29
OBNUC   13C
EXMOD   single pulse_dec
OBFRQ   100.53 MHz
OBSET   5.35 KHz
OBFIN   5.86 Hz
POINT   32768
FREQU   31407.03 Hz
SCANS   1024
ACQTM   1.0433 sec
PD       2.0000 sec
PW1     3.03 usec
IRNUC   1H
CTEMP   18.7 c
SLVNT   CDCL3
EXREF   77.01 ppm
BF       1.20 Hz
RGAIN   60
  
```

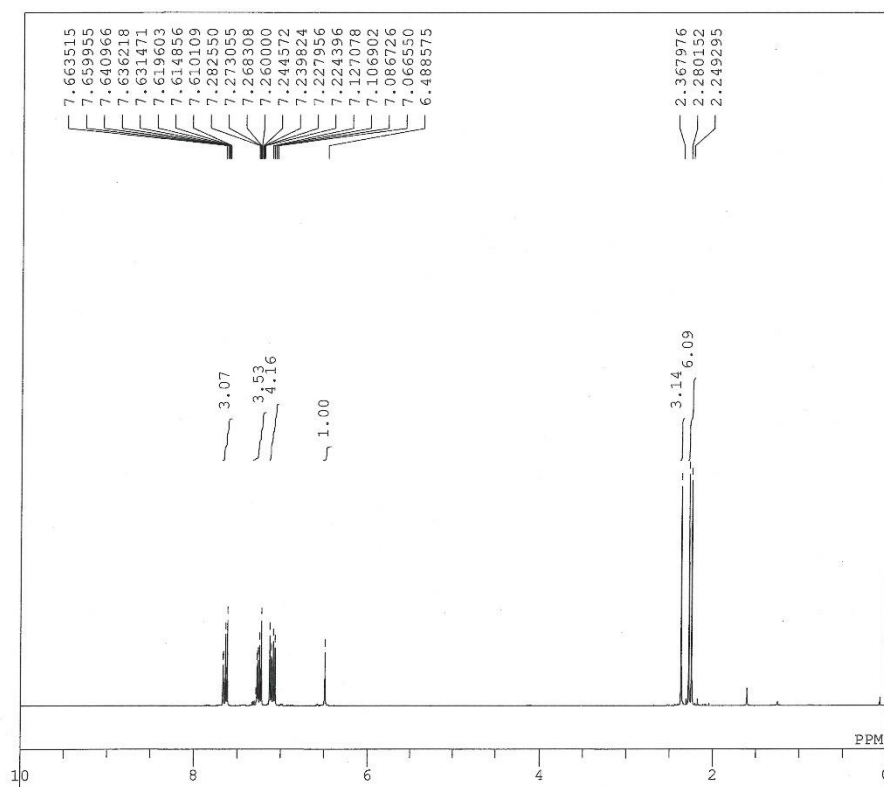

DFILE SF137 20211014-1.als  
 COMNT Qn-BOC 1H  
 DATIM 2021-10-14 16:00:16  
 OBNUC 1H  
 EXMOD single\_pulse.ex2  
 OBFRQ 399.78 MHz  
 OBSET 4.62 KHz  
 OBFIN 5.98 Hz  
 POINT 13107  
 FREQU 6218.81 Hz  
 SCANS 32  
 ACQTM 2.1076 sec  
 PD 5.0000 sec  
 PW1 5.17 usec  
 IRNUC 1H  
 CTEMP 18.3 c  
 SLVNT CDCL3  
 EXREF 7.26 ppm  
 BF 0.12 Hz  
 RGAIN 38

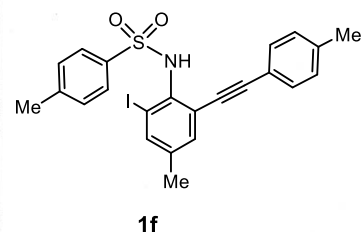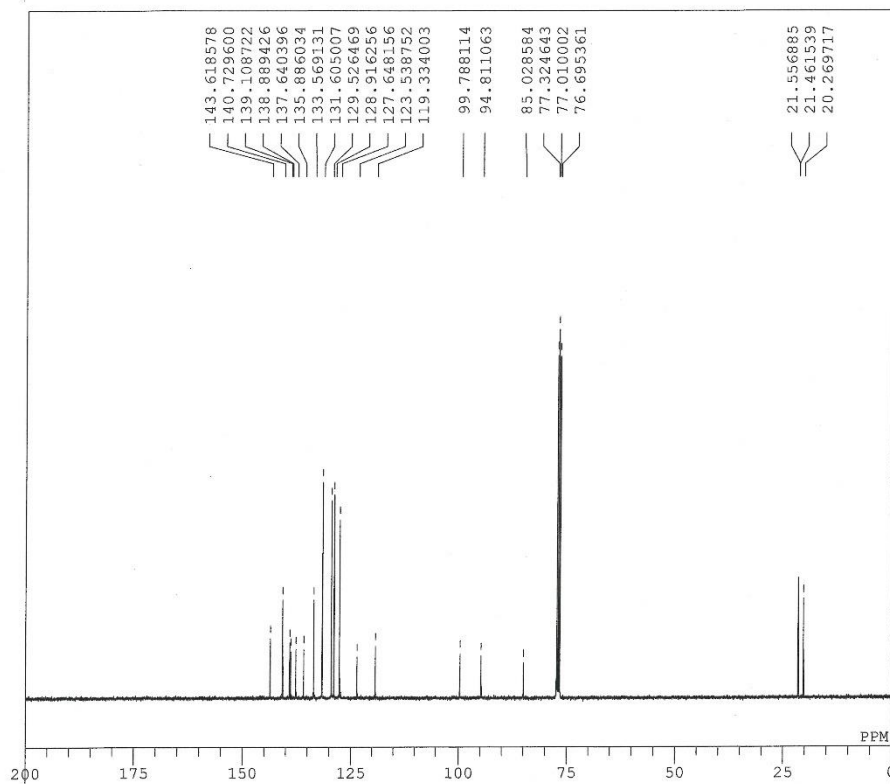

DFILE SF137-13C 20211015-1.als  
 COMNT  
 DATIM 2021-10-15 17:31:14  
 OBNUC 13C  
 EXMOD single\_pulse\_dec  
 OBFRQ 100.53 MHz  
 OBSET 5.35 KHz  
 OBFIN 5.86 Hz  
 POINT 32768  
 FREQU 31407.03 Hz  
 SCANS 1024  
 ACQTM 1.0433 sec  
 PD 2.0000 sec  
 PW1 3.03 usec  
 IRNUC 1H  
 CTEMP 18.7 c  
 SLVNT CDCL3  
 EXREF 77.01 ppm  
 BF 1.20 Hz  
 RGAIN 60

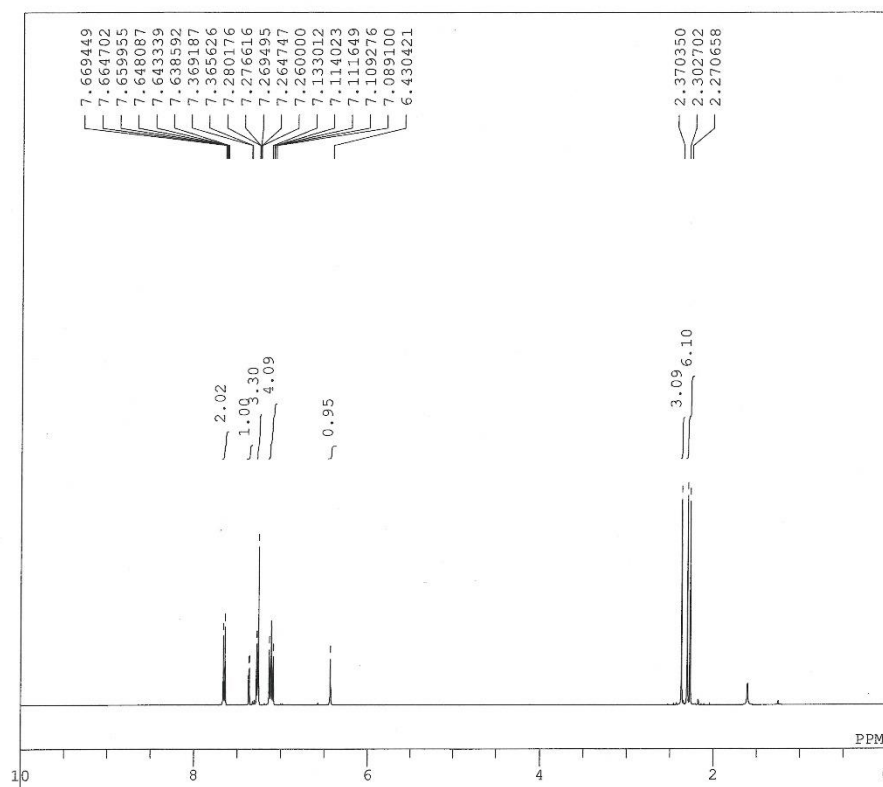

DFILE YK308 20210916-1.als  
 COMNT Qn-BOC 1H  
 DATIM 2021-09-16 15:31:22  
 OBNUC 1H  
 EXMOD single pulse.ex2  
 OBFRQ 399.78 MHz  
 OBSET 4.62 KHz  
 OBFIN 5.98 Hz  
 POINT 16384  
 FREQU 7773.63 Hz  
 SCANS 32  
 ACQTM 2.1076 sec  
 PD 5.0000 sec  
 PW1 5.17 usec  
 IRNUC 1H  
 CTEMP 19.2 c  
 SLVNT CDCL3  
 EXREF 7.26 ppm  
 BF 0.12 Hz  
 RGAIN 38

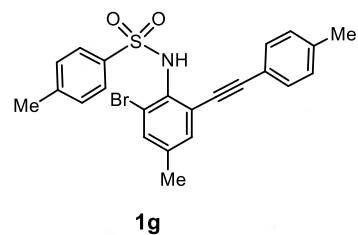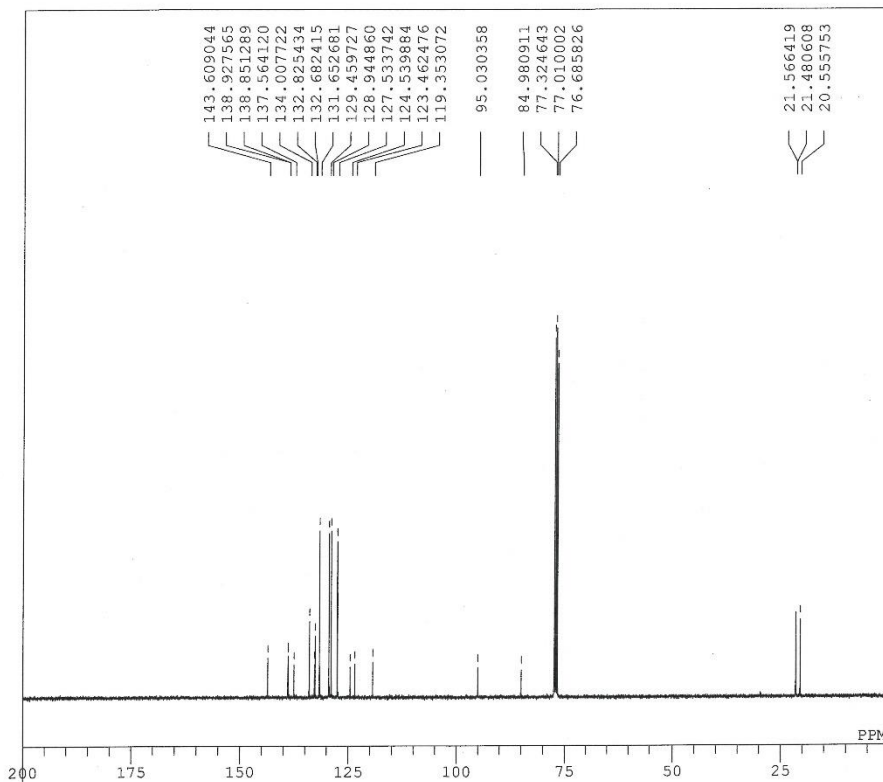

DFILE YK308-13C 20210915-1.als  
 COMNT  
 DATIM 2021-09-15 09:29:30  
 OBNUC 13C  
 EXMOD single pulse\_dec  
 OBFRQ 100.53 MHz  
 OBSET 5.35 KHz  
 OBFIN 5.86 Hz  
 POINT 32768  
 FREQU 31407.03 Hz  
 SCANS 1024  
 ACQTM 1.0433 sec  
 PD 2.0000 sec  
 PW1 3.03 usec  
 IRNUC 1H  
 CTEMP 19.1 c  
 SLVNT CDCL3  
 EXREF 77.01 ppm  
 BF 1.20 Hz  
 RGAIN 60

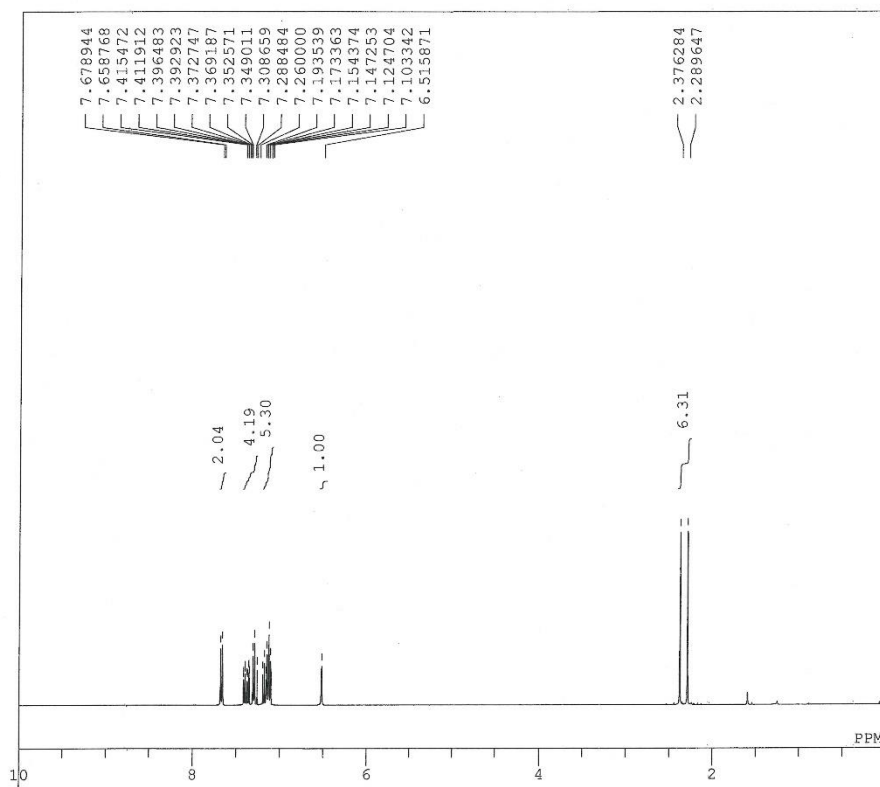

DFILE SF107 20211121-1.als  
 COMNT Qn-BOC 1H  
 DATIM 2021-11-21 17:28:03  
 OBNUC 1H  
 EXMOD single pulse.ex2  
 OBFRQ 399.78 MHz  
 OBSET 4.62 KHz  
 OBFIN 5.98 Hz  
 POINT 16384  
 FREQU 7773.63 Hz  
 SCANS 32  
 ACQTM 2.1076 sec  
 PD 5.0000 sec  
 PW1 5.80 usec  
 IRNUC 1H  
 CTEMP 18.4 c  
 SLVNT CDCL3  
 EXREF 7.26 ppm  
 BF 0.12 Hz  
 RGAIN 34

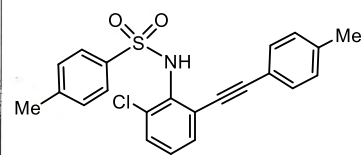

1h

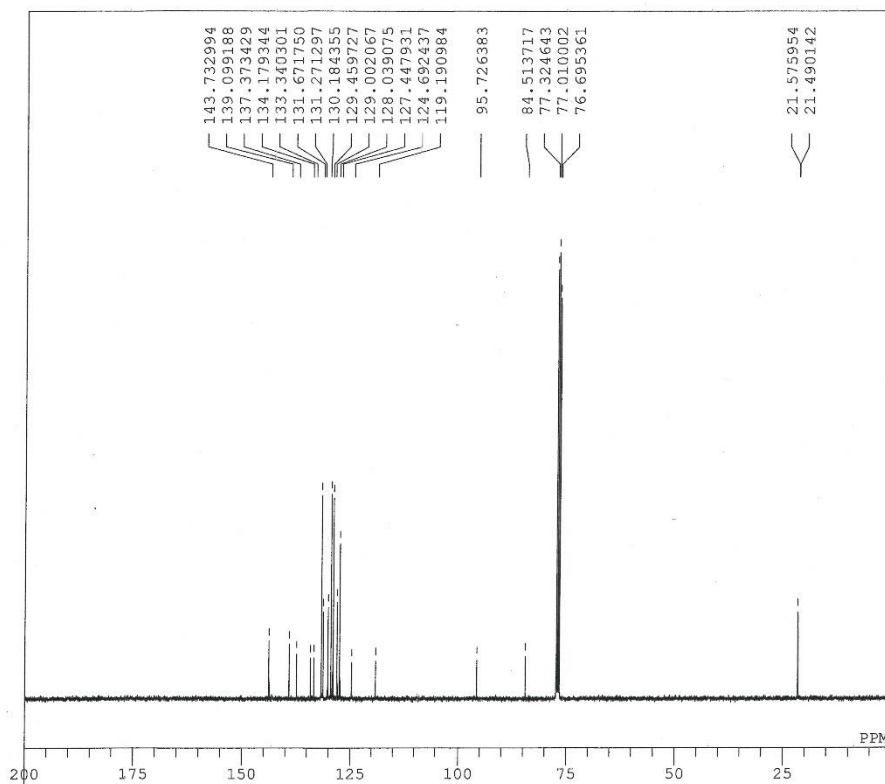

DFILE SF107-13C 20211121-1.als  
 COMNT  
 DATIM 2021-11-21 15:25:46  
 OBNUC 13C  
 EXMOD single pulse\_dec  
 OBFRQ 100.53 MHz  
 OBSET 5.35 KHz  
 OBFIN 5.86 Hz  
 POINT 32768  
 FREQU 31407.03 Hz  
 SCANS 1024  
 ACQTM 1.0433 sec  
 PD 2.0000 sec  
 PW1 3.23 usec  
 IRNUC 1H  
 CTEMP 18.6 c  
 SLVNT CDCL3  
 EXREF 77.01 ppm  
 BF 1.20 Hz  
 RGAIN 60

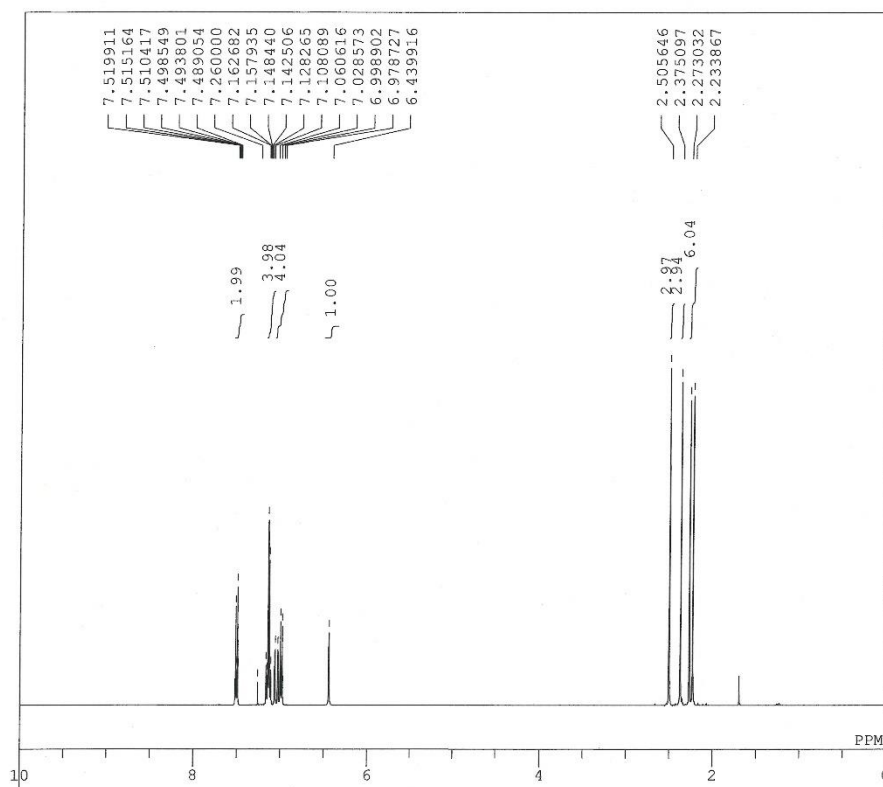

DFILE TT045 20211005-1.als  
 COMNT Qn-BOC 1H  
 DATIM 2021-10-05 14:50:54  
 OBNUC 1H  
 EXMOD single pulse.ex2  
 OBFRQ 399.78 MHz  
 OBSET 4.62 KHz  
 OBFIN 5.98 Hz  
 POINT 13107  
 FREQU 6218.81 Hz  
 SCANS 32  
 ACQTM 2.1076 sec  
 PD 5.0000 sec  
 PW1 5.17 usec  
 IRNUC 1H  
 CTEMP 18.8 c  
 SLVNT CDCL3  
 EXREF 7.26 ppm  
 BF 0.12 Hz  
 RGAIN 30

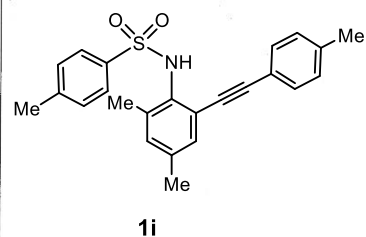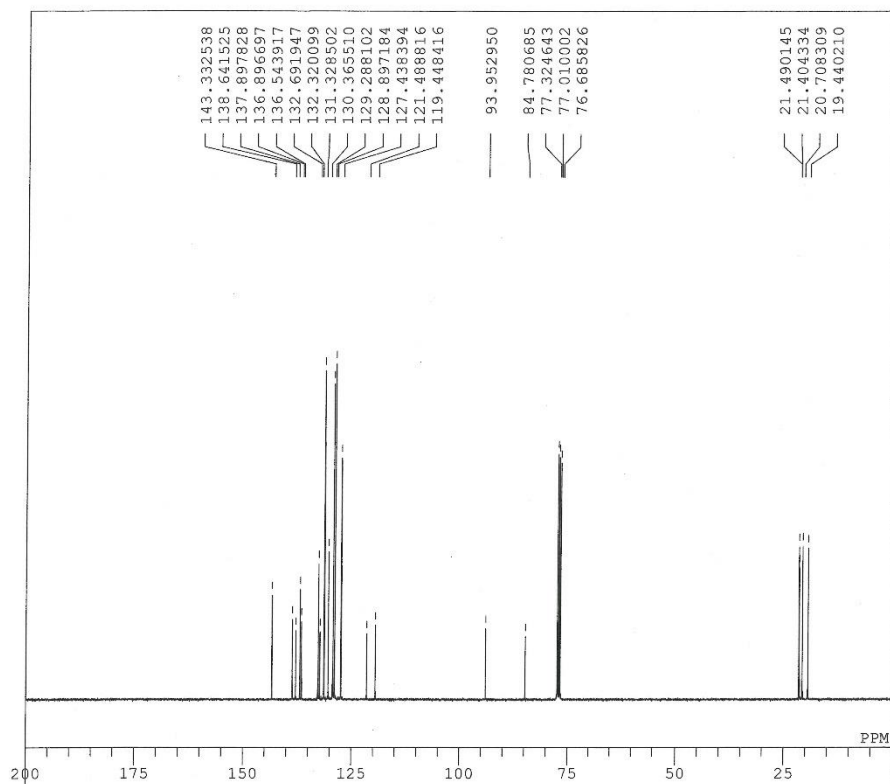

DFILE TT045-13C 20211002-1.als  
 COMNT  
 DATIM 2021-10-02 15:12:02  
 OBNUC 13C  
 EXMOD single pulse\_dec  
 OBFRQ 100.53 MHz  
 OBSET 5.35 KHz  
 OBFIN 5.86 Hz  
 POINT 32768  
 FREQU 31407.03 Hz  
 SCANS 1024  
 ACQTM 1.0433 sec  
 PD 2.0000 sec  
 PW1 3.03 usec  
 IRNUC 1H  
 CTEMP 19.0 c  
 SLVNT CDCL3  
 EXREF 77.01 ppm  
 BF 1.20 Hz  
 RGAIN 60

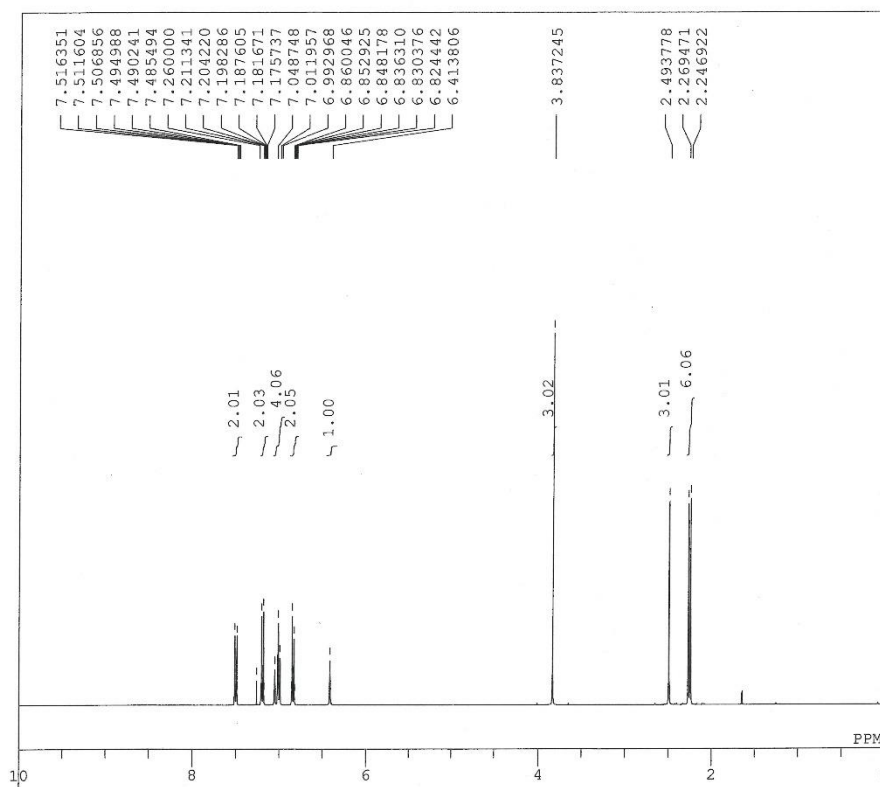

DFILE SF105 20210928-1.als  
 COMNT Qn-BOC 1H  
 DATIM 2021-09-28 16:19:29  
 OBNUC 1H  
 EXMOD single pulse.ex2  
 OBFRQ 399.78 MHz  
 OBSET 4.62 KHz  
 OBFIN 5.98 Hz  
 POINT 13107  
 FREQU 6218.81 Hz  
 SCANS 32  
 ACQTM 2.1076 sec  
 PD 5.0000 sec  
 PW1 5.17 usec  
 IRNUC 1H  
 CTEMP 19.1 c  
 SLVNT CDCL3  
 EXREF 7.26 ppm  
 BF 0.12 Hz  
 RGAIN 30

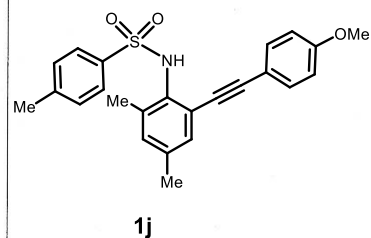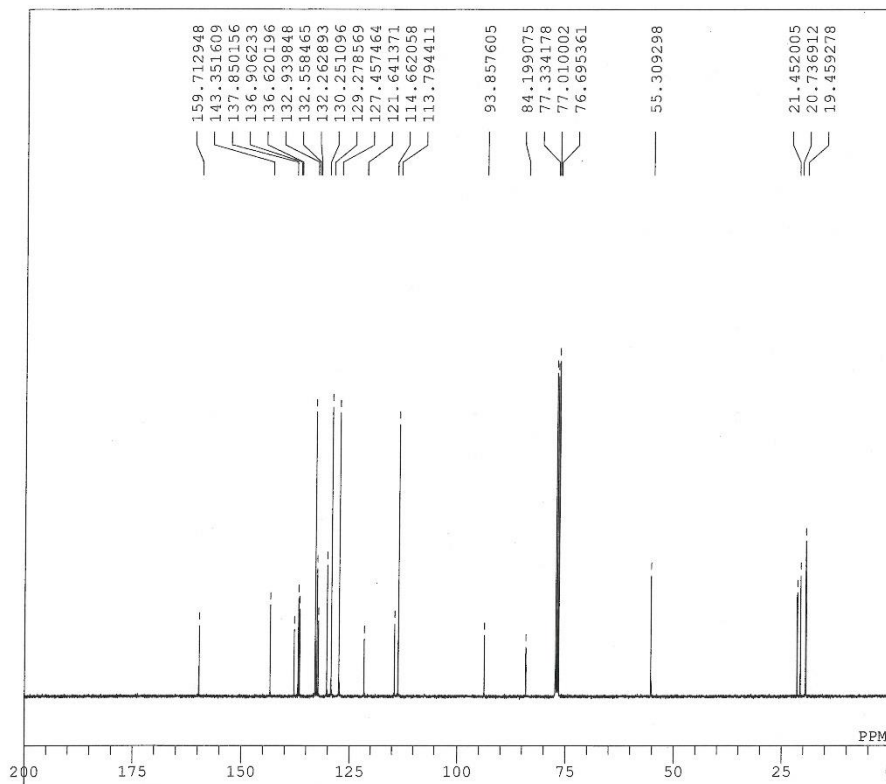

DFILE SF105-13C 20210928-1.als  
 COMNT  
 DATIM 2021-09-28 18:58:42  
 OBNUC 13C  
 EXMOD single pulse\_dec  
 OBFRQ 100.53 MHz  
 OBSET 5.35 KHz  
 OBFIN 5.86 Hz  
 POINT 32768  
 FREQU 31407.03 Hz  
 SCANS 1024  
 ACQTM 1.0433 sec  
 PD 2.0000 sec  
 PW1 3.03 usec  
 IRNUC 1H  
 CTEMP 19.1 c  
 SLVNT CDCL3  
 EXREF 77.01 ppm  
 BF 1.20 Hz  
 RGAIN 60



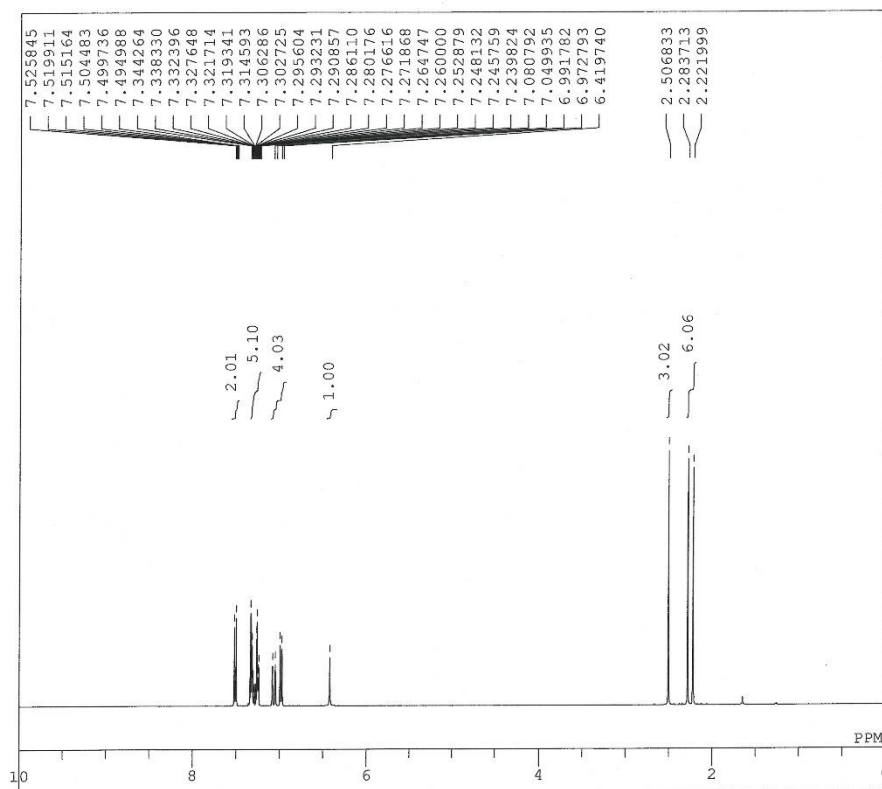

DFILE Y0019 20210929-1.als  
 COMNT Qn-BOC 1H  
 DATIM 2021-09-29 10:05:24  
 OBNUC 1H  
 EXMOD single\_pulse.ex2  
 OBFRQ 399.78 MHz  
 OBSET 4.62 KHz  
 OBFIN 5.98 Hz  
 POINT 13107  
 FREQU 6218.81 Hz  
 SCANS 32  
 ACQTM 2.1076 sec  
 PD 5.0000 sec  
 PW1 5.17 usec  
 IRNUC 1H  
 CTEMP 18.6 c  
 SLVNT CDCL3  
 EXREF 7.26 ppm  
 BF 0.12 Hz  
 RGAIN 30

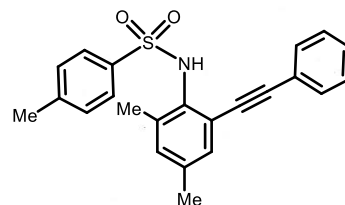

**1k**

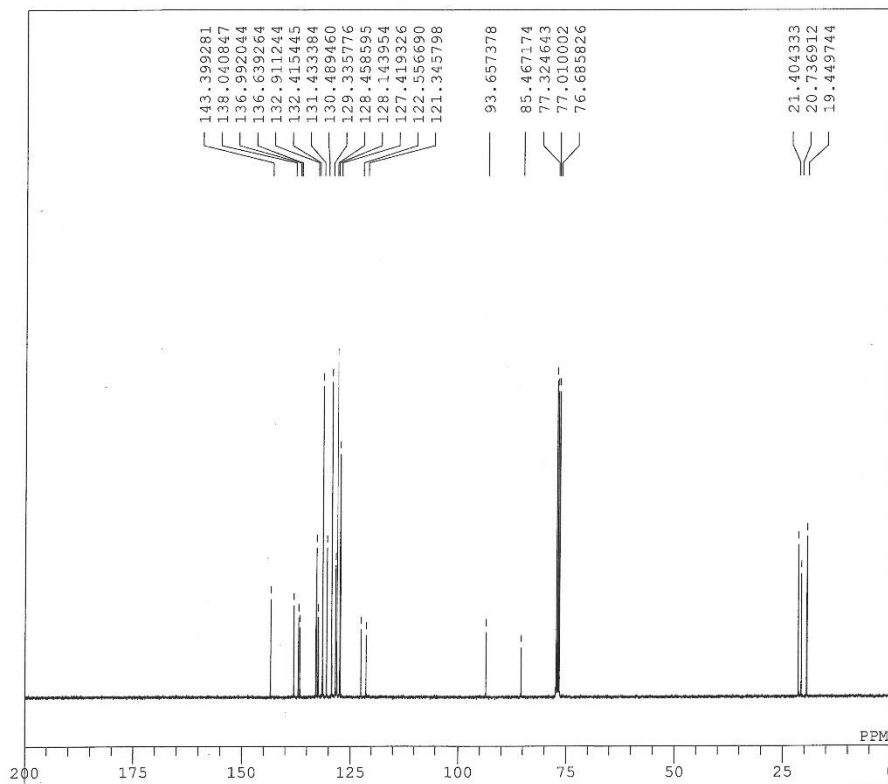

DFILE Y0019-13C 20210929-1.als  
 COMNT 2021-09-29 18:13:15  
 OBNUC 13C  
 EXMOD single\_pulse\_dec  
 OBFRQ 100.53 MHz  
 OBSET 5.35 KHz  
 OBFIN 5.86 Hz  
 POINT 32768  
 FREQU 31407.03 Hz  
 SCANS 1024  
 ACQTM 1.0433 sec  
 PD 2.0000 sec  
 PW1 3.03 usec  
 IRNUC 1H  
 CTEMP 18.9 c  
 SLVNT CDCL3  
 EXREF 77.01 ppm  
 BF 1.20 Hz  
 RGAIN 60



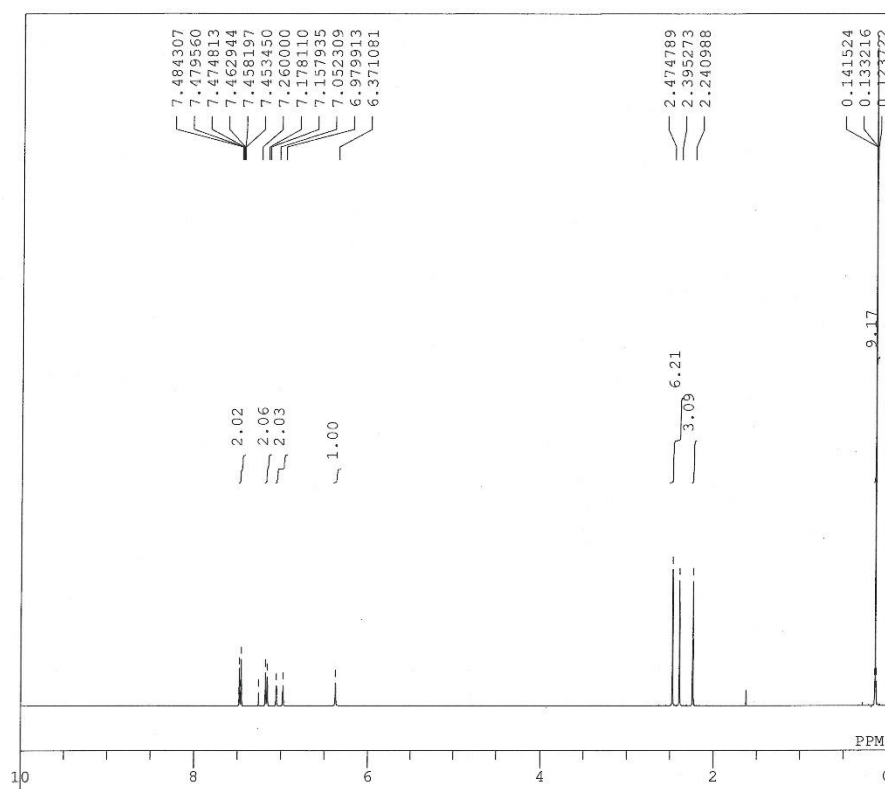

DFILE TT030 20210929-1.als  
 COMNT Qn-BOC 1H  
 DATIM 2021-09-29 10:16:13  
 OBNUC 1H  
 EXMOD single pulse.ex2  
 OBFRQ 399.78 MHz  
 OBSET 4.62 KHz  
 OBFIN 5.98 Hz  
 POINT 13107  
 FREQU 6218.81 Hz  
 SCANS 32  
 ACQTM 2.1076 sec  
 PD 5.0000 sec  
 PW1 5.17 usec  
 IRNUC 1H  
 CTEMP 19.0 c  
 SLVNT CDCL3  
 EXREF 7.26 ppm  
 BF 0.12 Hz  
 RGAIN 30

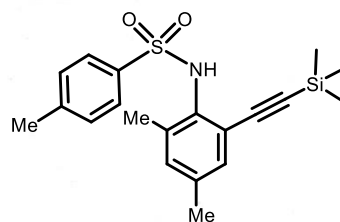

11

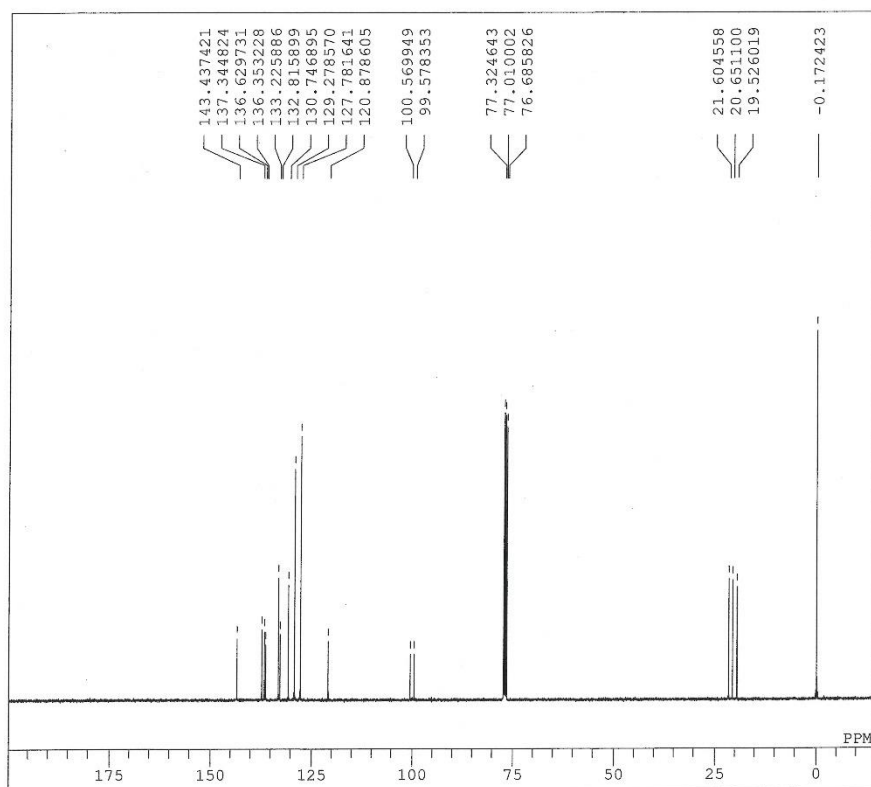

DFILE TT030-13C 20210930-1.als  
 COMNT  
 DATIM 2021-09-30 08:58:03  
 OBNUC 13C  
 EXMOD single pulse\_dec  
 OBFRQ 100.53 MHz  
 OBSET 5.35 KHz  
 OBFIN 5.86 Hz  
 POINT 32768  
 FREQU 31407.03 Hz  
 SCANS 1024  
 ACQTM 1.0433 sec  
 PD 2.0000 sec  
 PW1 3.03 usec  
 IRNUC 1H  
 CTEMP 19.0 c  
 SLVNT CDCL3  
 EXREF 77.01 ppm  
 BF 1.20 Hz  
 RGAIN 60

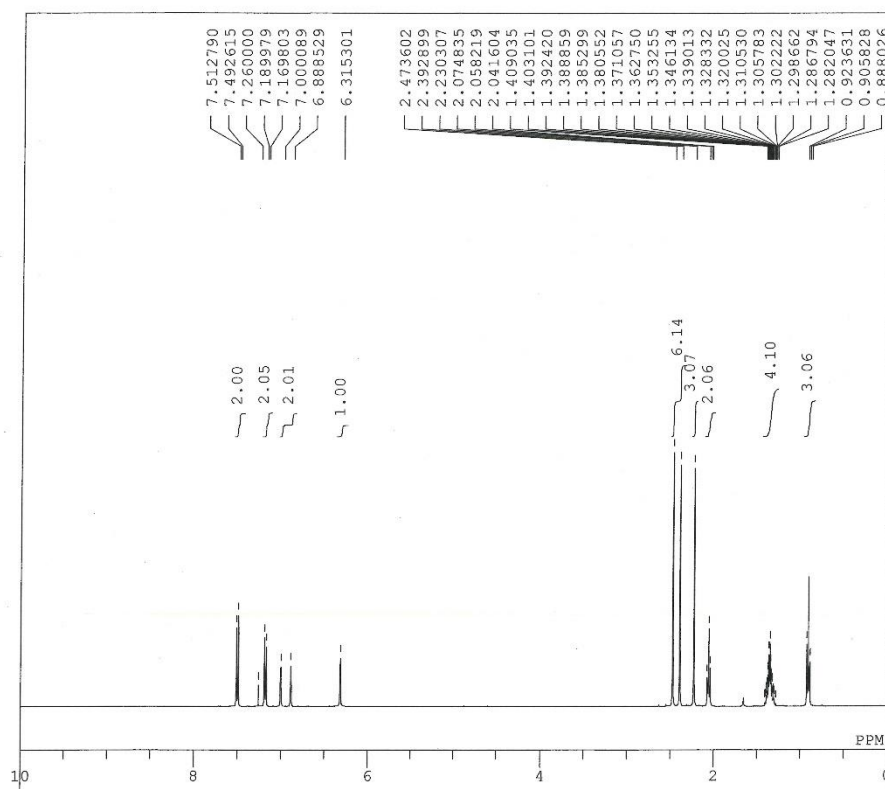

DFILE SF095 20210929-1.als  
 COMNT Qn-BOC 1H  
 DATIM 2021-09-29 09:54:42  
 OBNUC 1H  
 EXMOD single pulse.ex2  
 OBFRQ 399.78 MHz  
 OBSET 4.62 KHz  
 OBFIN 5.98 Hz  
 POINT 13107  
 FREQU 6218.81 Hz  
 SCANS 32  
 ACQTM 2.1076 sec  
 PD 5.0000 sec  
 PW1 5.17 usec  
 IRNUC 1H  
 CTEMP 18.8 c  
 SLVNT CDCL3  
 EXREF 7.26 ppm  
 BF 0.12 Hz  
 RGAIN 30

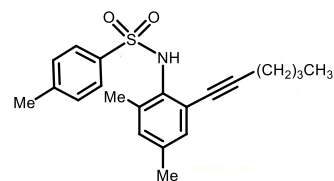

1m

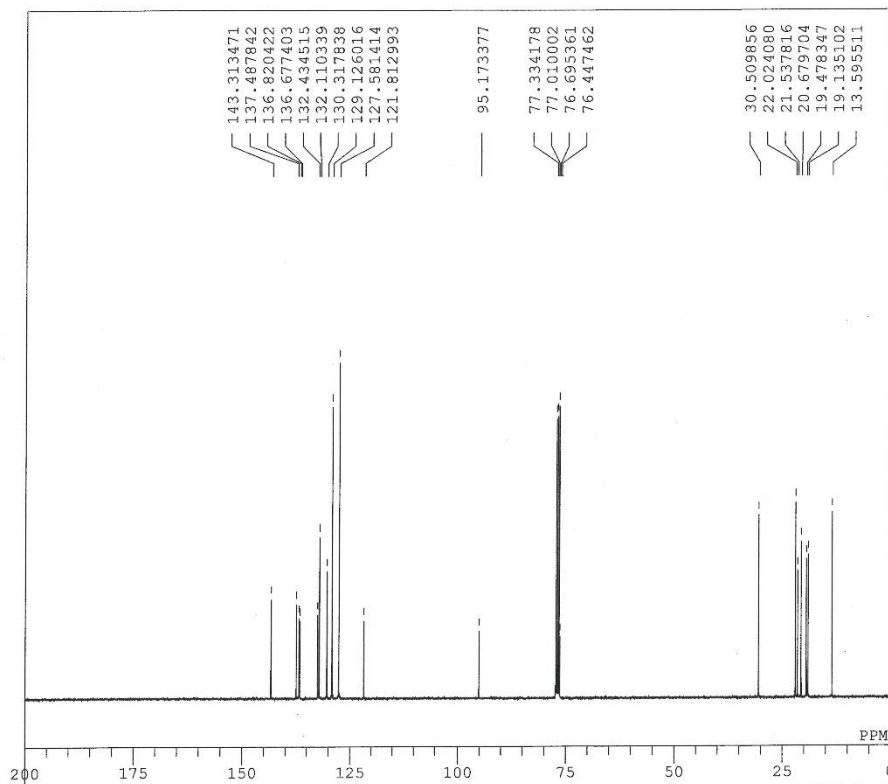

DFILE SF095-13C 20210929-1.als  
 COMNT  
 DATIM 2021-09-29 08:43:57  
 OBNUC 13C  
 EXMOD single pulse\_dec  
 OBFRQ 100.53 MHz  
 OBSET 5.35 KHz  
 OBFIN 5.86 Hz  
 POINT 32768  
 FREQU 31407.03 Hz  
 SCANS 1024  
 ACQTM 1.0433 sec  
 PD 2.0000 sec  
 PW1 3.03 usec  
 IRNUC 1H  
 CTEMP 19.2 c  
 SLVNT CDCL3  
 EXREF 77.01 ppm  
 BF 1.20 Hz  
 RGAIN 60

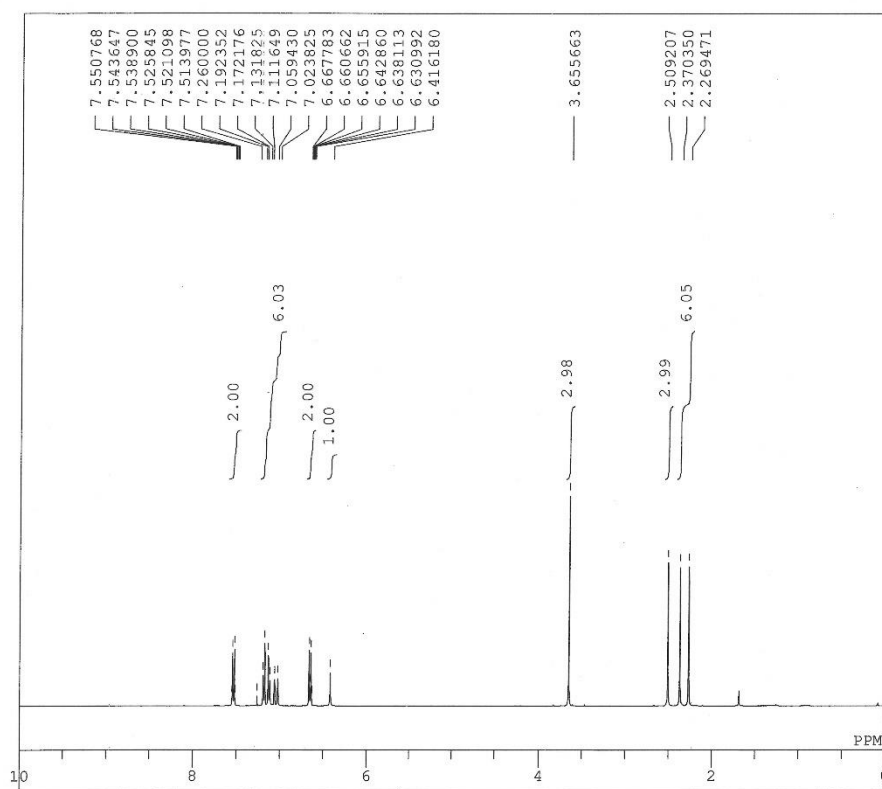

DFILE TF007 20210921-1.als  
 COMNT Qn-BOC 1H  
 DATIM 2021-09-21 08:42:19  
 OBNUC 1H  
 EXMOD single pulse.ex2  
 OBFRQ 399.78 MHz  
 OBSET 4.62 KHz  
 OBFIN 5.98 Hz  
 POINT 13107  
 FREQU 6218.81 Hz  
 SCANS 32  
 ACQTM 2.1076 sec  
 PD 5.0000 sec  
 PW1 5.17 usec  
 IRNUC 1H  
 CTEMP 19.0 c  
 SLVNT CDCL3  
 EXREF 7.26 ppm  
 BF 0.12 Hz  
 RGAIN 30

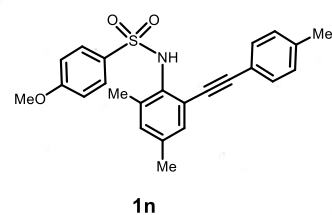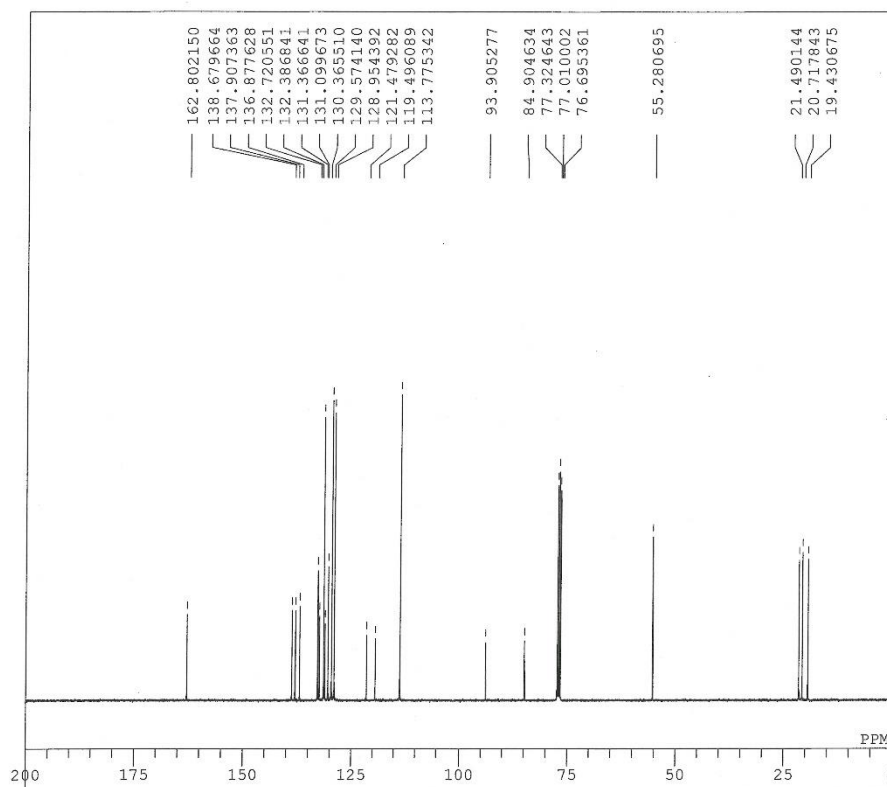

DFILE TF007-13C 20210921-1.als  
 COMNT 2021-09-21 09:41:44  
 OBNUC 13C  
 EXMOD single pulse\_dec  
 OBFRQ 100.53 MHz  
 OBSET 5.35 KHz  
 OBFIN 5.86 Hz  
 POINT 26214  
 FREQU 25125.24 Hz  
 SCANS 1024  
 ACQTM 1.0433 sec  
 PD 2.0000 sec  
 PW1 3.03 usec  
 IRNUC 1H  
 CTEMP 19.3 c  
 SLVNT CDCL3  
 EXREF 77.01 ppm  
 BF 1.20 Hz  
 RGAIN 60

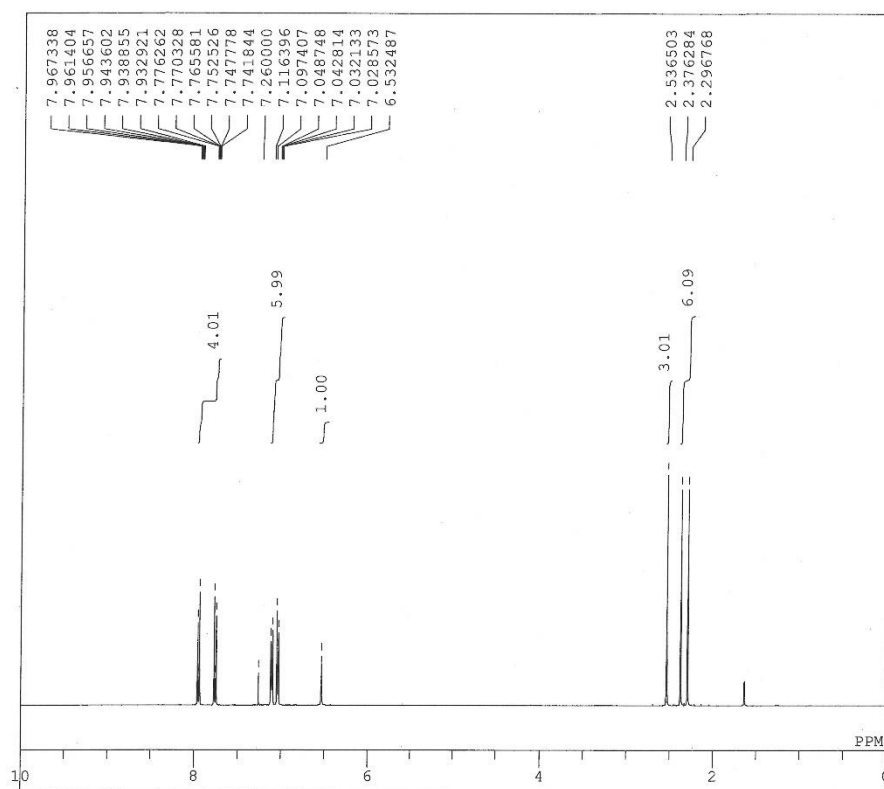

DFILE TT010 20210930-1.als  
 COMNT Qn-BOC 1H  
 DATIM 2021-09-30 10:19:17  
 OBNUC 1H  
 EXMOD single pulse.ex2  
 OBFRQ 399.78 MHz  
 OBSET 4.62 KHz  
 OBFIN 5.98 Hz  
 POINT 13107  
 FREQU 6218.81 Hz  
 SCANS 32  
 ACQTM 2.1076 sec  
 PD 5.0000 sec  
 PW1 5.17 usec  
 IRNUC 1H  
 CTEMP 19.1 c  
 SLVNT CDCL3  
 EXREF 7.26 ppm  
 BF 0.12 Hz  
 RGAIN 34

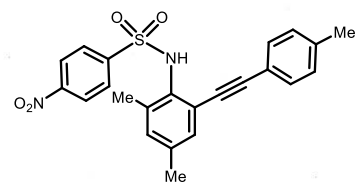

**1o**

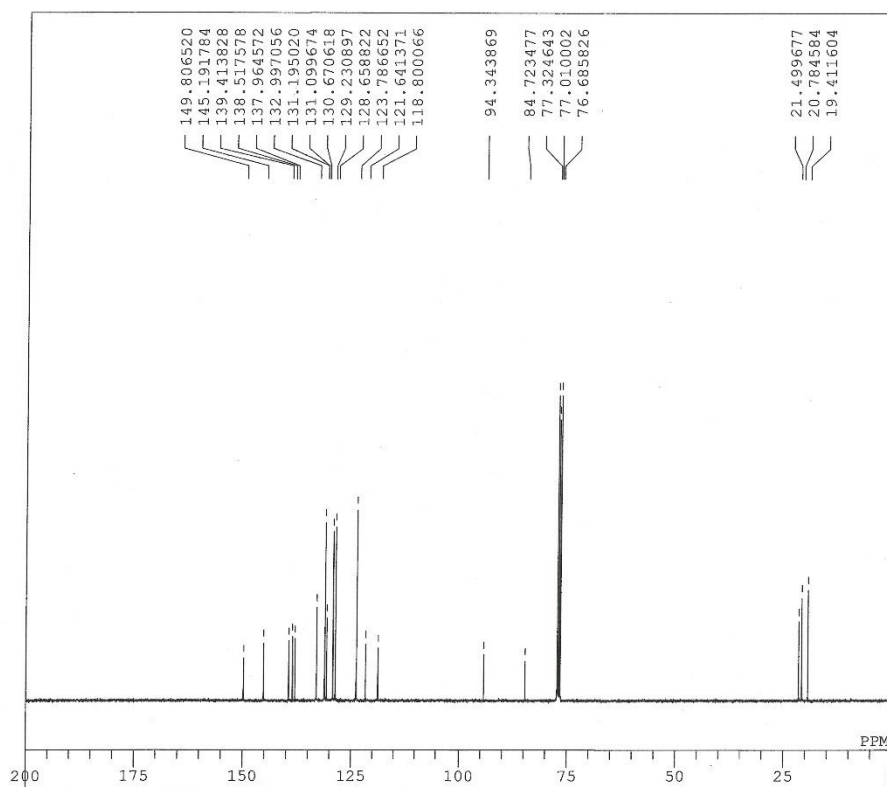

DFILE TT010-13C 20210930-1.als  
 COMNT  
 DATIM 2021-09-30 18:12:17  
 OBNUC 13C  
 EXMOD single pulse\_dec  
 OBFRQ 100.53 MHz  
 OBSET 5.35 KHz  
 OBFIN 5.86 Hz  
 POINT 26214  
 FREQU 25125.24 Hz  
 SCANS 1024  
 ACQTM 1.0433 sec  
 PD 2.0000 sec  
 PW1 3.03 usec  
 IRNUC 1H  
 CTEMP 20.3 c  
 SLVNT CDCL3  
 EXREF 77.01 ppm  
 BF 1.20 Hz  
 RGAIN 60

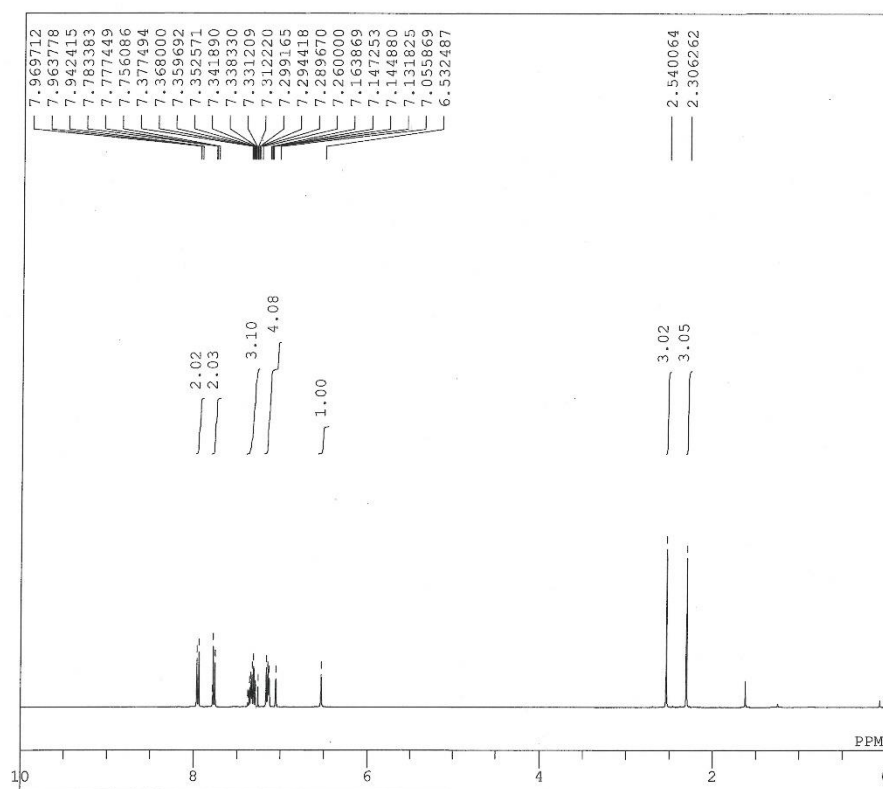

DFILE SF112 20211207-1.als  
 COMNT Qn-BOC 1H  
 DATIM 2021-12-06 15:50:34  
 OBNUC 1H  
 EXMOD single pulse.ex2  
 OBFRQ 399.78 MHz  
 OBSET 4.62 KHz  
 OBFIN 5.98 Hz  
 POINT 13107  
 FREQU 6218.81 Hz  
 SCANS 32  
 ACQTM 2.1076 sec  
 PD 5.0000 sec  
 PW1 5.80 usec  
 IRNUC 1H  
 CTEMP 18.0 c  
 SLVNT CDCL3  
 EXREF 7.26 ppm  
 BF 0.12 Hz  
 RGAIN 34

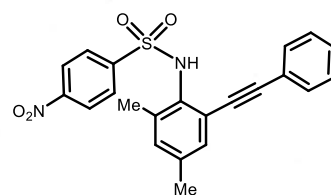

1p

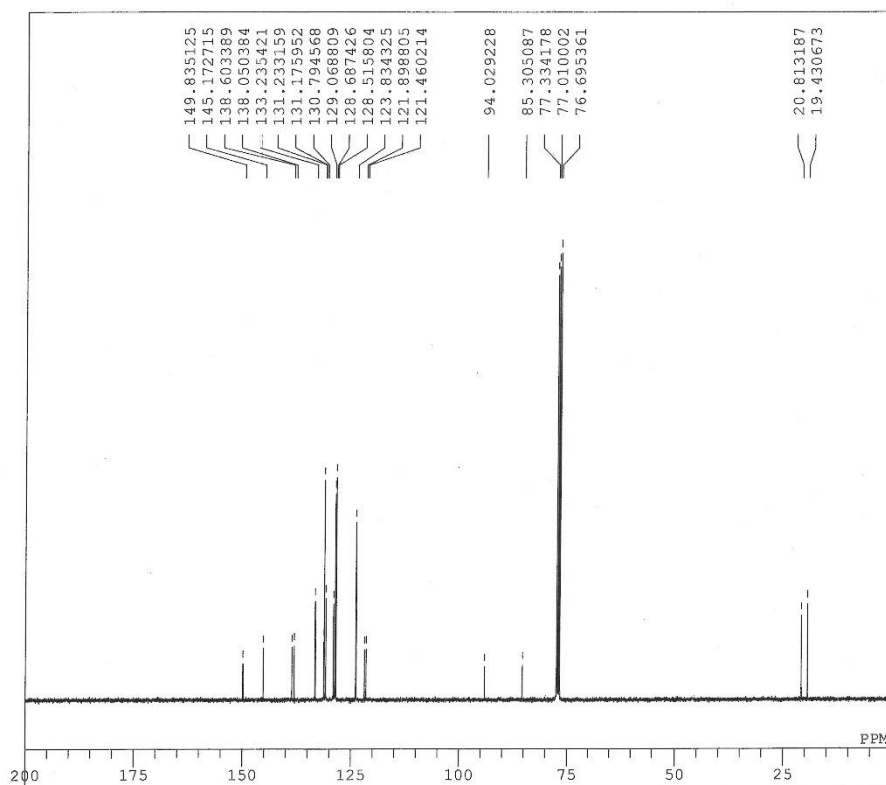

DFILE SF112 13C 20211207-1.als  
 COMNT  
 DATIM 2021-12-07 10:32:06  
 OBNUC 13C  
 EXMOD single pulse\_dec  
 OBFRQ 100.53 MHz  
 OBSET 5.35 KHz  
 OBFIN 5.86 Hz  
 POINT 26214  
 FREQU 25125.24 Hz  
 SCANS 1024  
 ACQTM 1.0433 sec  
 PD 2.0000 sec  
 PW1 3.23 usec  
 IRNUC 1H  
 CTEMP 18.1 c  
 SLVNT CDCL3  
 EXREF 77.01 ppm  
 BF 1.20 Hz  
 RGAIN 60

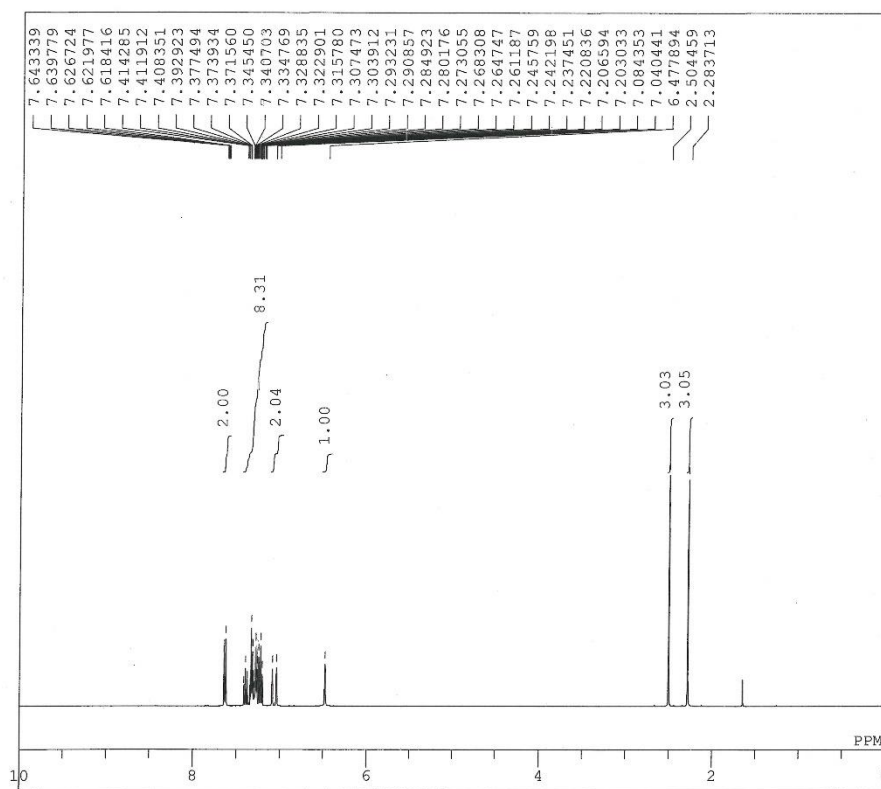

DFILE SF121 20210930-1.als  
 COMNT Qn-BOC 1H  
 DATIM 2021-09-30 10:30:05  
 OBNUC 1H  
 EXMOD single pulse.ex2  
 OBFRQ 399.78 MHz  
 OBSET 4.62 KHz  
 OBFIN 5.98 Hz  
 POINT 13107  
 FREQU 6218.81 Hz  
 SCANS 32  
 ACQTM 2.1076 sec  
 PD 5.0000 sec  
 PW1 5.17 usec  
 IRNUC 1H  
 CTEMP 18.9 c  
 SLVNT CDCL3  
 EXREF 7.26 ppm  
 BF 0.12 Hz  
 RGAIN 30

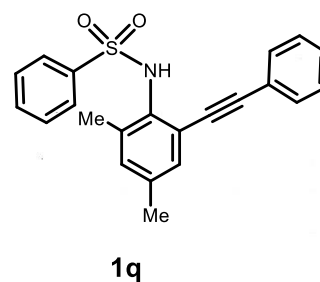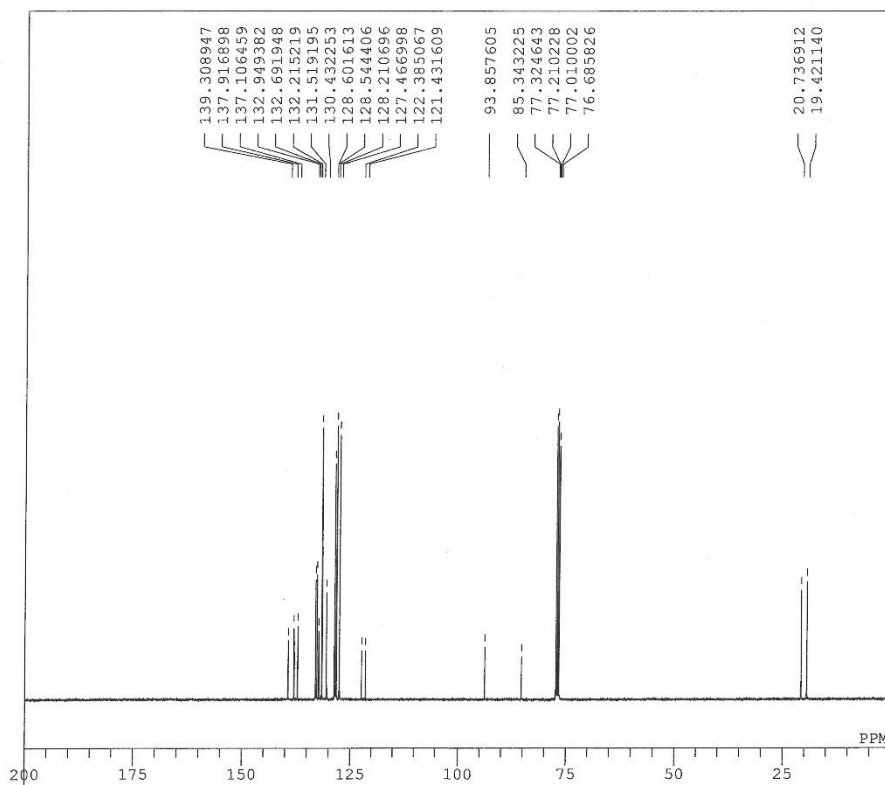

DFILE SF121-13C 20211002-1.als  
 COMNT  
 DATIM 2021-10-02 09:53:39  
 OBNUC 13C  
 EXMOD single\_pulse\_dec  
 OBFRQ 100.53 MHz  
 OBSET 5.35 KHz  
 OBFIN 5.86 Hz  
 POINT 26214  
 FREQU 25125.24 Hz  
 SCANS 1024  
 ACQTM 1.0433 sec  
 PD 2.0000 sec  
 PW1 3.03 usec  
 IRNUC 1H  
 CTEMP 19.0 c  
 SLVNT CDCL3  
 EXREF 77.01 ppm  
 BF 1.20 Hz  
 RGAIN 60



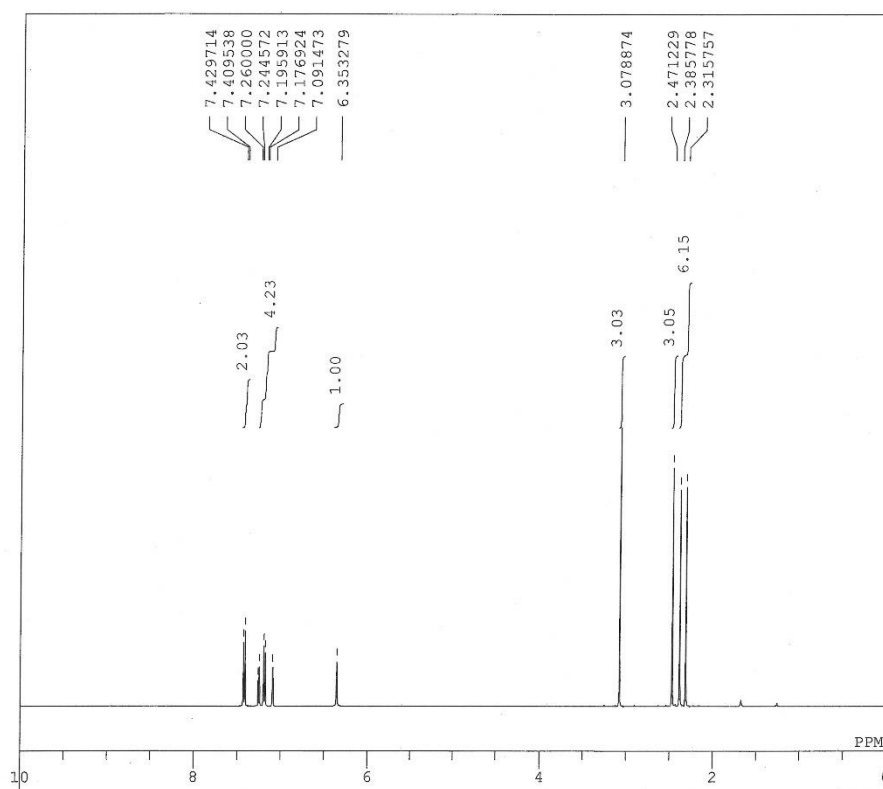

DFILE SF088 20211213-1.als  
 COMNT Qn-BOC 1H  
 DATIM 2021-12-13 13:28:17  
 OBNUC 1H  
 EXMOD single\_pulse.ex2  
 OBFRQ 399.78 MHz  
 OBSET 4.62 KHz  
 OBFIN 5.98 Hz  
 POINT 16384  
 FREQU 7773.63 Hz  
 SCANS 32  
 ACQTM 2.1076 sec  
 PD 5.0000 sec  
 PW1 5.80 usec  
 IRNUC 1H  
 CTEMP 18.5 c  
 SLVNT CDCL3  
 EXREF 7.26 ppm  
 BF 0.12 Hz  
 RGAIN 30

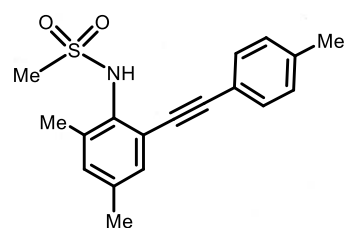

**1r**

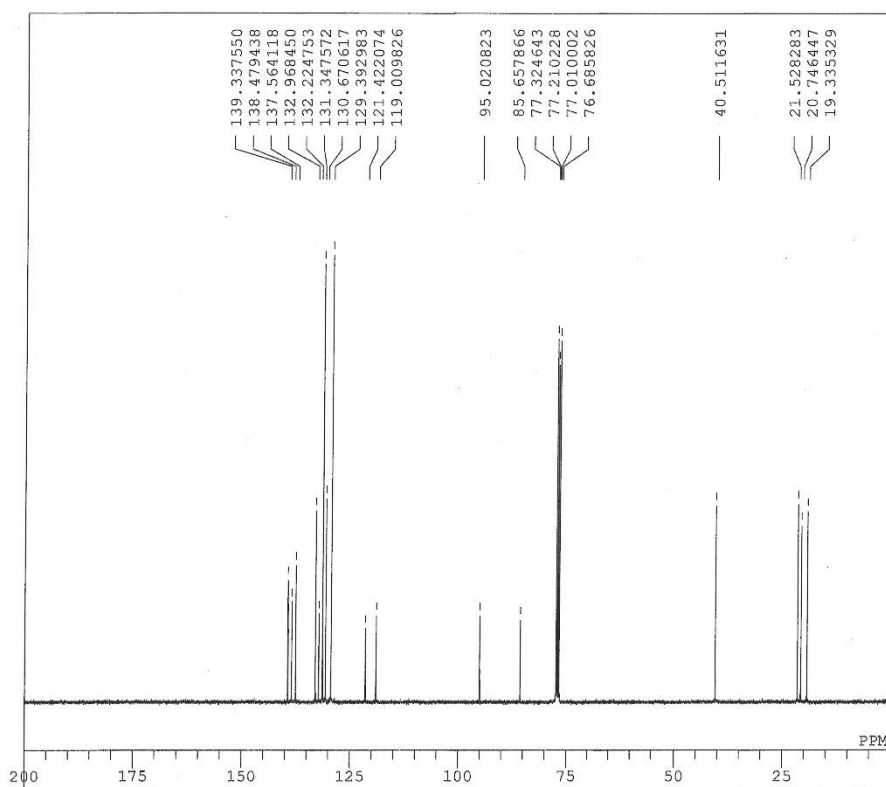

DFILE SF088 13C 20211213-1.als  
 COMNT  
 DATIM 2021-12-13 09:38:13  
 OBNUC 13C  
 EXMOD single\_pulse\_dec  
 OBFRQ 100.53 MHz  
 OBSET 5.35 KHz  
 OBFIN 5.86 Hz  
 POINT 32768  
 FREQU 31407.03 Hz  
 SCANS 1024  
 ACQTM 1.0433 sec  
 PD 2.0000 sec  
 PW1 3.23 usec  
 IRNUC 1H  
 CTEMP 18.5 c  
 SLVNT CDCL3  
 EXREF 77.01 ppm  
 BF 1.20 Hz  
 RGAIN 60

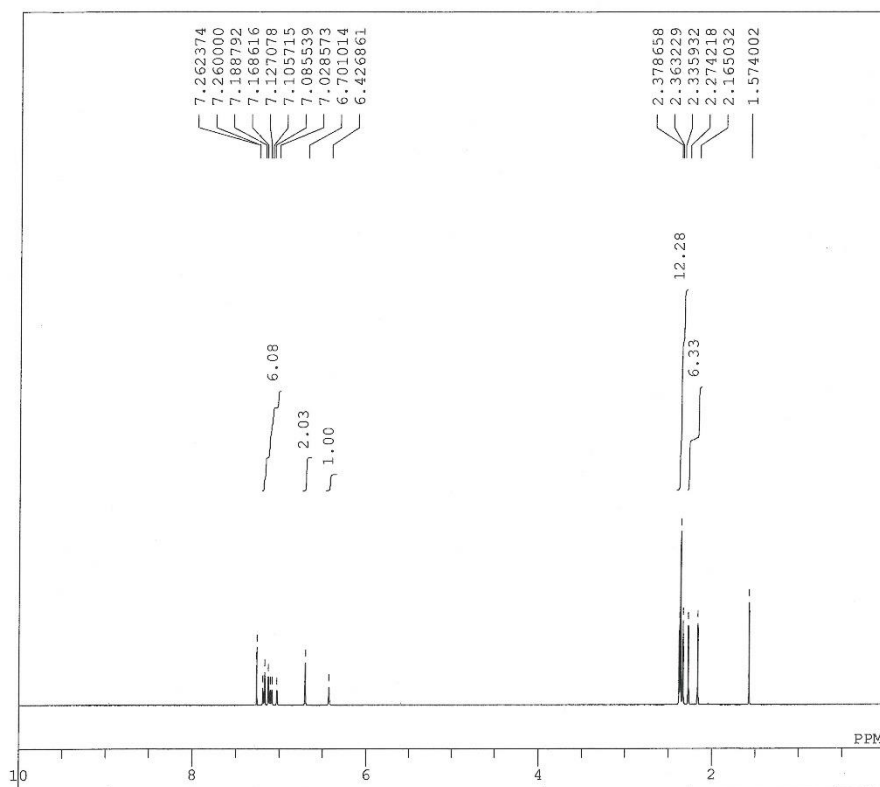

DFILE SF102 20211129-1.als  
 COMNT Qn-BOC 1H  
 DATIM 2021-11-29 11:57:15  
 OBNUC 1H  
 EXMOD single pulse.ex2  
 OBFRQ 399.78 MHz  
 OBSET 4.62 KHz  
 OBFIN 5.98 Hz  
 POINT 13107  
 FREQU 6218.81 Hz  
 SCANS 32  
 ACQTM 2.1076 sec  
 PD 5.0000 sec  
 PW1 5.80 usec  
 IRNUC 1H  
 CTEMP 17.8 c  
 SLVNT CDCL3  
 EXREF 7.26 ppm  
 BF 0.12 Hz  
 RGAIN 36

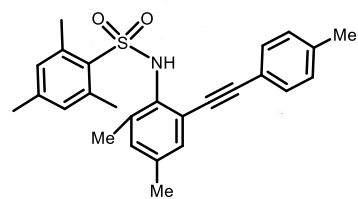

**1s**

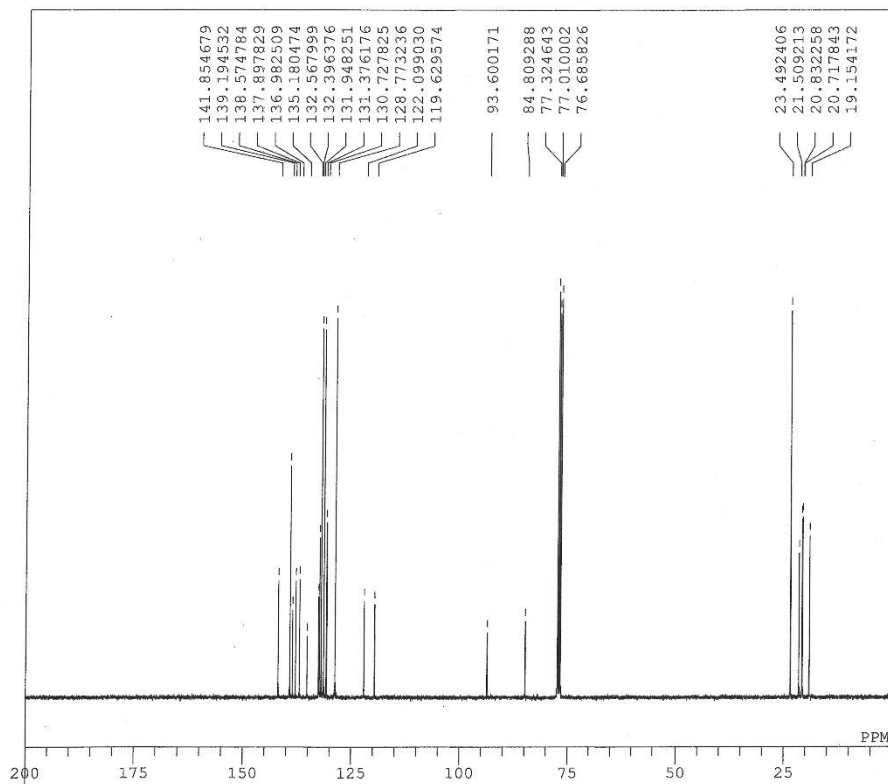

DFILE SF102 13C-2 20211130-1.a  
 COMNT  
 DATIM 2021-11-30 18:17:36  
 OBNUC 13C  
 EXMOD single pulse\_dec  
 OBFRQ 100.53 MHz  
 OBSET 5.35 KHz  
 OBFIN 5.86 Hz  
 POINT 26214  
 FREQU 25125.24 Hz  
 SCANS 1024  
 ACQTM 1.0433 sec  
 PD 2.0000 sec  
 PW1 3.23 usec  
 IRNUC 1H  
 CTEMP 19.8 c  
 SLVNT CDCL3  
 EXREF 77.01 ppm  
 BF 1.20 Hz  
 RGAIN 60



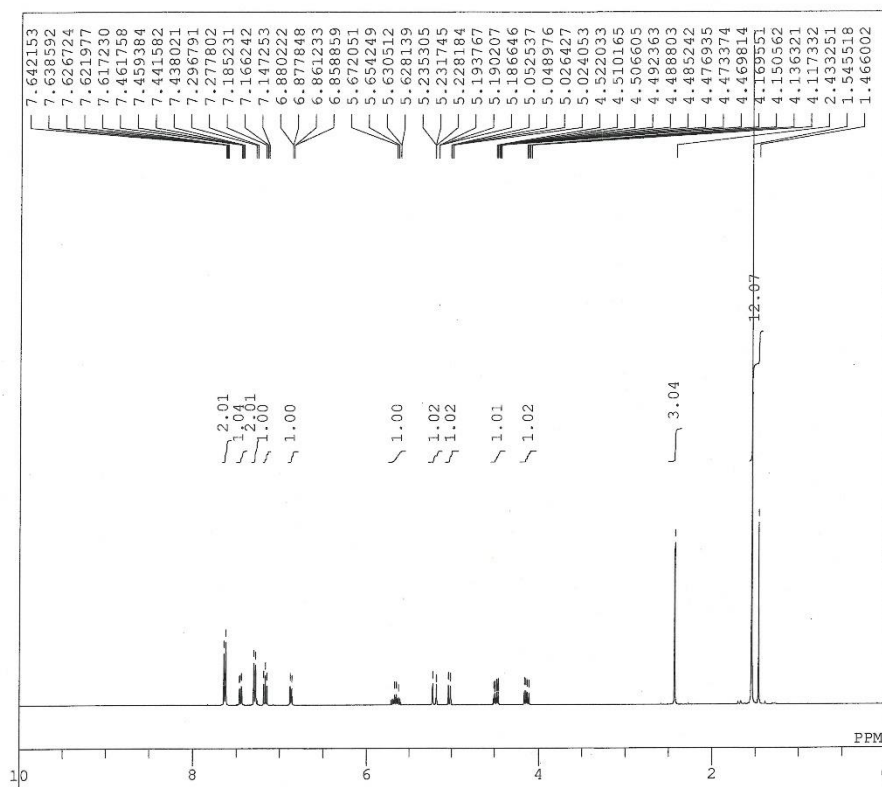

DFILE Y0015 20211008-1.als  
 COMNT Qn-BOC 1H  
 DATIM 2021-10-08 13:58:12  
 OBNUC 1H  
 EXMOD single pulse.ex2  
 OBFRQ 399.78 MHz  
 OBSET 4.62 KHz  
 OBFIN 5.98 Hz  
 POINT 13107  
 FREQU 6218.81 Hz  
 SCANS 32  
 ACQTM 2.1076 sec  
 PD 5.0000 sec  
 PW1 5.17 usec  
 IRNUC 1H  
 CTEMP 18.5 c  
 SLVNT CDCL3  
 EXREF 7.26 ppm  
 BF 0.12 Hz  
 RGAIN 20

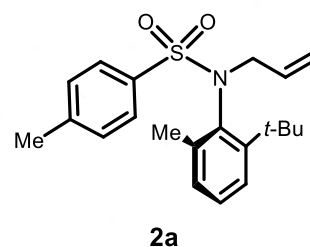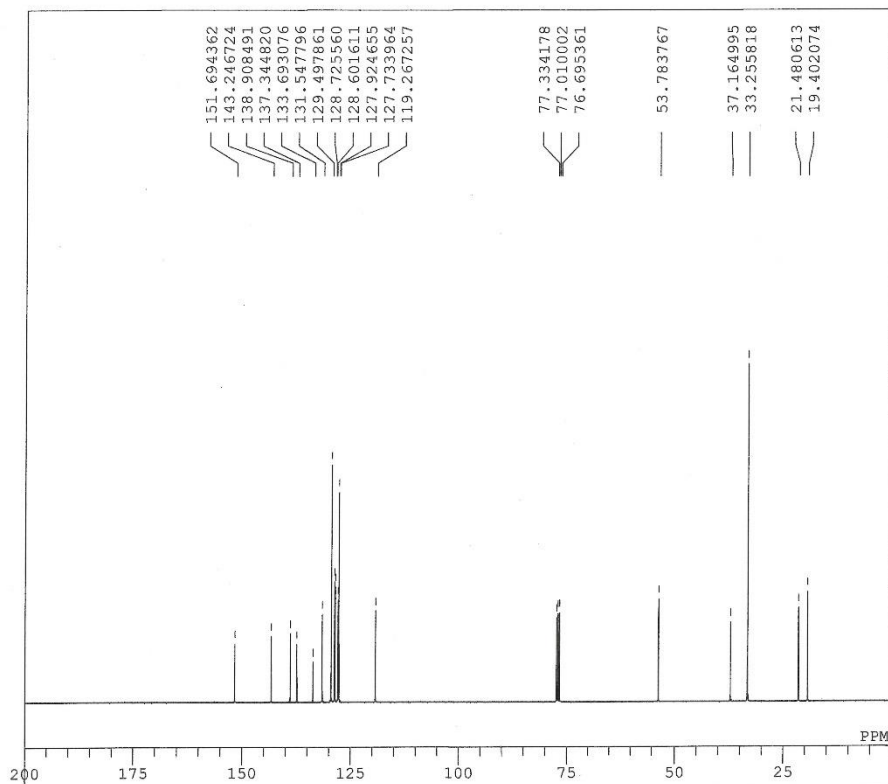

DFILE Y0015-13C 20211008-1.als  
 COMNT  
 DATIM 2021-10-08 17:31:11  
 OBNUC 13C  
 EXMOD single pulse\_dec  
 OBFRQ 100.53 MHz  
 OBSET 5.35 KHz  
 OBFIN 5.86 Hz  
 POINT 32768  
 FREQU 31407.03 Hz  
 SCANS 1024  
 ACQTM 1.0433 sec  
 PD 2.0000 sec  
 PW1 3.03 usec  
 IRNUC 1H  
 CTEMP 19.3 c  
 SLVNT CDCL3  
 EXREF 77.01 ppm  
 BF 1.20 Hz  
 RGAIN 60

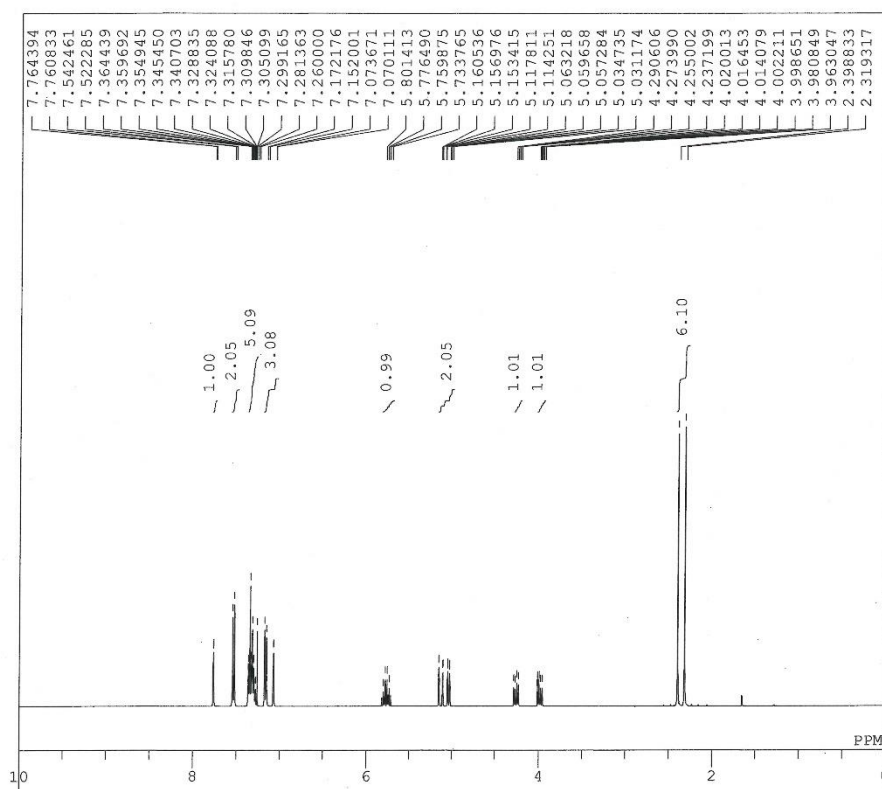

DFILE TT088 20211111-1.als  
 COMNT Qn-BOC 1H  
 DATIM 2021-11-11 15:20:11  
 OBNUC 1H  
 EXMOD single pulse.ex2  
 OBFRQ 399.78 MHz  
 OBSET 4.62 KHz  
 OBFIN 5.98 Hz  
 POINT 13107  
 FREQU 6218.81 Hz  
 SCANS 32  
 ACQTM 2.1076 sec  
 PD 5.0000 sec  
 PW1 5.17 usec  
 IRNUC 1H  
 CTEMP 19.1 c  
 SLVNT CDCL3  
 EXREF 7.26 ppm  
 BF 0.12 Hz  
 RGAIN 24

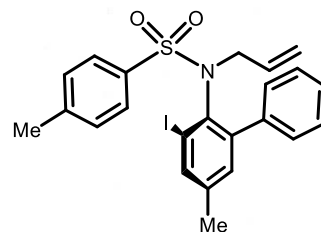

**2b**

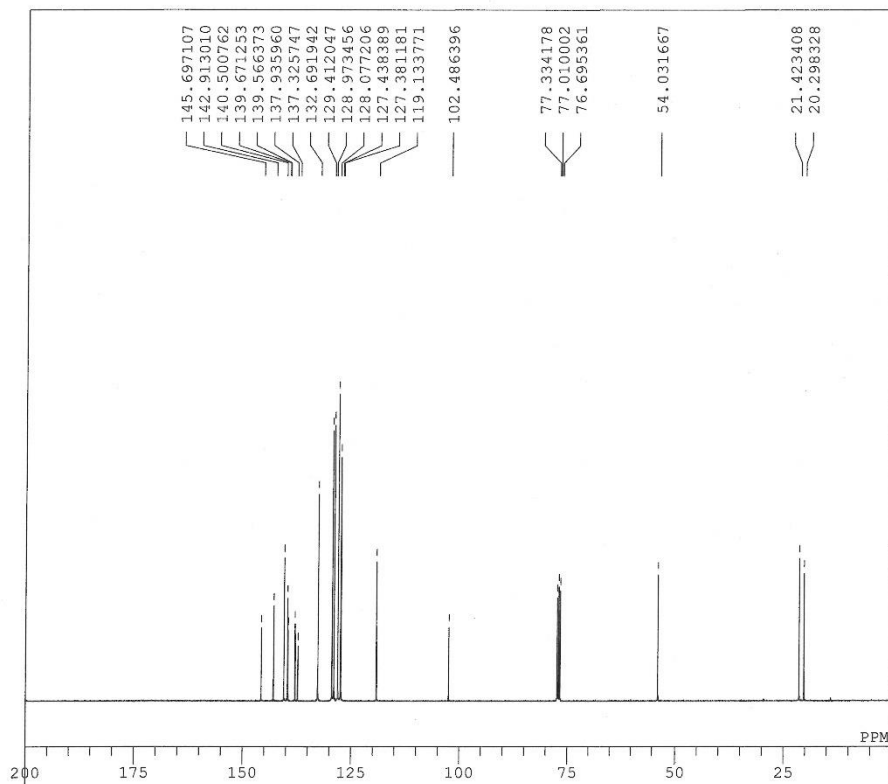

DFILE TT088 carbon 20211027-1.  
 COMNT  
 DATIM 2021-10-27 20:34:04  
 OBNUC 13C  
 EXMOD single pulse\_dec  
 OBFRQ 100.53 MHz  
 OBSET 5.35 KHz  
 OBFIN 5.86 Hz  
 POINT 26214  
 FREQU 25125.24 Hz  
 SCANS 1024  
 ACQTM 1.0433 sec  
 PD 2.0000 sec  
 PW1 3.03 usec  
 IRNUC 1H  
 CTEMP 18.5 c  
 SLVNT CDCL3  
 EXREF 77.01 ppm  
 BF 1.20 Hz  
 RGAIN 60

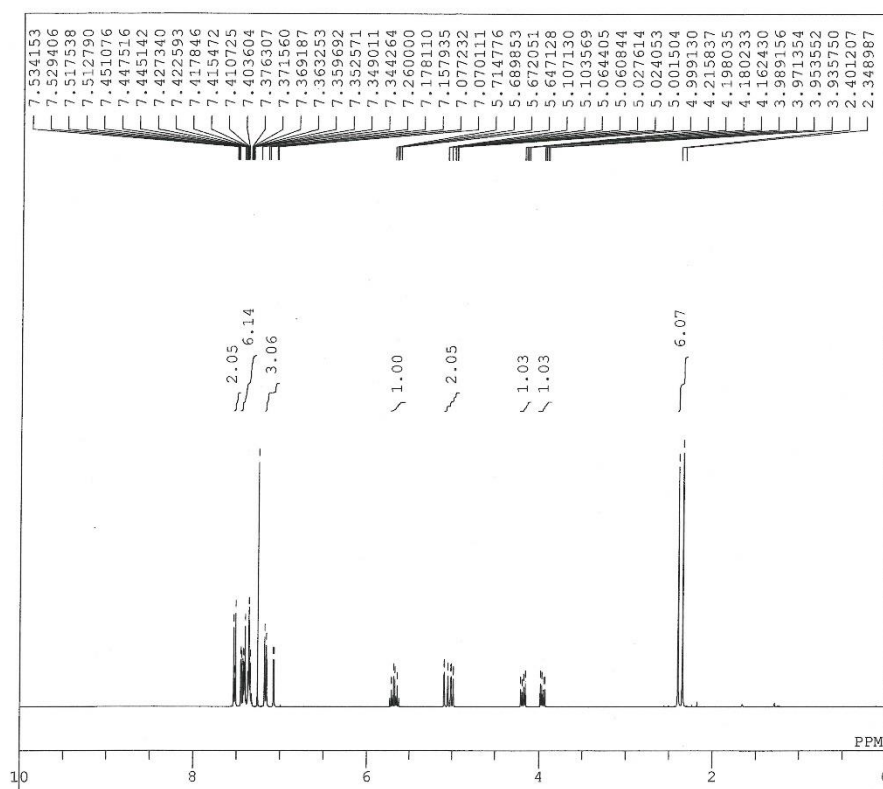

DFILE SF136 20211025-1.als  
 COMNT Qn-BOC 1H  
 DATIM 2021-10-25 15:16:18  
 OBNUC 1H  
 EXMOD single\_pulse.ex2  
 OBFRQ 399.78 MHz  
 OBSET 4.62 KHz  
 OBFIN 5.98 Hz  
 POINT 16384  
 FREQU 7773.63 Hz  
 SCANS 32  
 ACQTM 2.1076 sec  
 PD 5.0000 sec  
 PW1 5.17 usec  
 IRNUC 1H  
 CTEMP 17.6 c  
 SLVNT CDCL3  
 EXREF 7.26 ppm  
 BF 0.12 Hz  
 RGAIN 24

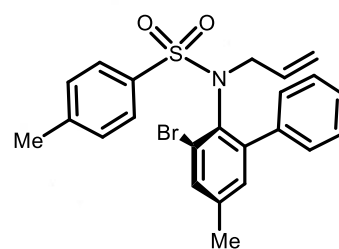

**2c**

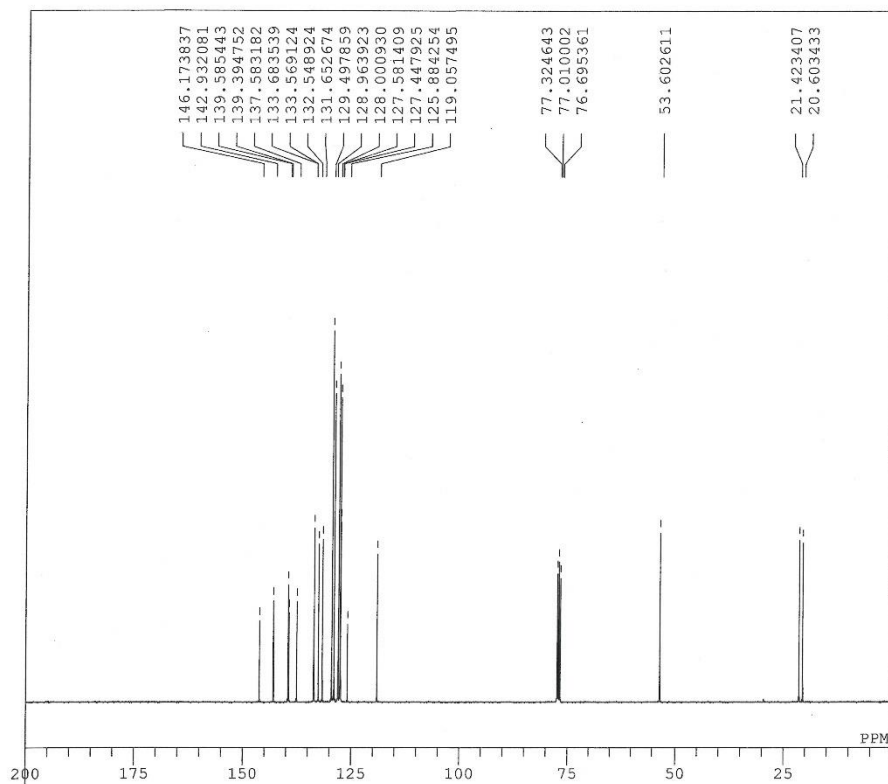

DFILE SF136-13C 20211025-1.als  
 COMNT  
 DATIM 2021-10-25 18:54:20  
 OBNUC 13C  
 EXMOD single\_pulse\_dec  
 OBFRQ 100.53 MHz  
 OBSET 5.35 KHz  
 OBFIN 5.86 Hz  
 POINT 32768  
 FREQU 31407.03 Hz  
 SCANS 1024  
 ACQTM 1.0433 sec  
 PD 2.0000 sec  
 PW1 3.03 usec  
 IRNUC 1H  
 CTEMP 18.1 c  
 SLVNT CDCL3  
 EXREF 77.01 ppm  
 BF 1.20 Hz  
 RGAIN 60

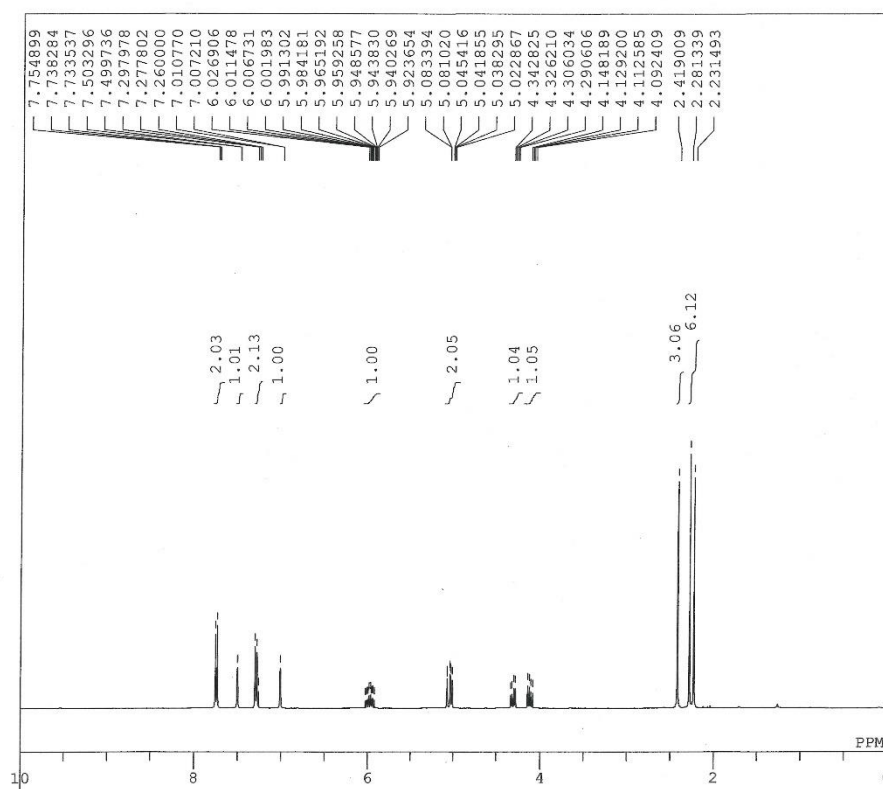

DFILE RK036 20211029-1.als  
 COMNT Qn-BOC 1H  
 DATIM 2021-10-29 16:08:06  
 OBNUC 1H  
 EXMOD single pulse.ex2  
 OBFRQ 399.78 MHz  
 OBSET 4.62 KHz  
 OBFIN 5.98 Hz  
 POINT 16384  
 FREQU 7773.63 Hz  
 SCANS 32  
 ACQTM 2.1076 sec  
 PD 5.0000 sec  
 PW1 5.17 usec  
 IRNUC 1H  
 CTEMP 18.7 c  
 SLVNT CDCL3  
 EXREF 7.26 ppm  
 BF 0.12 Hz  
 RGAIN 22

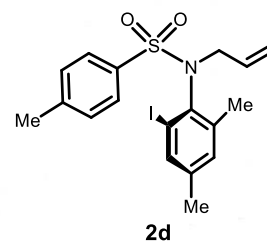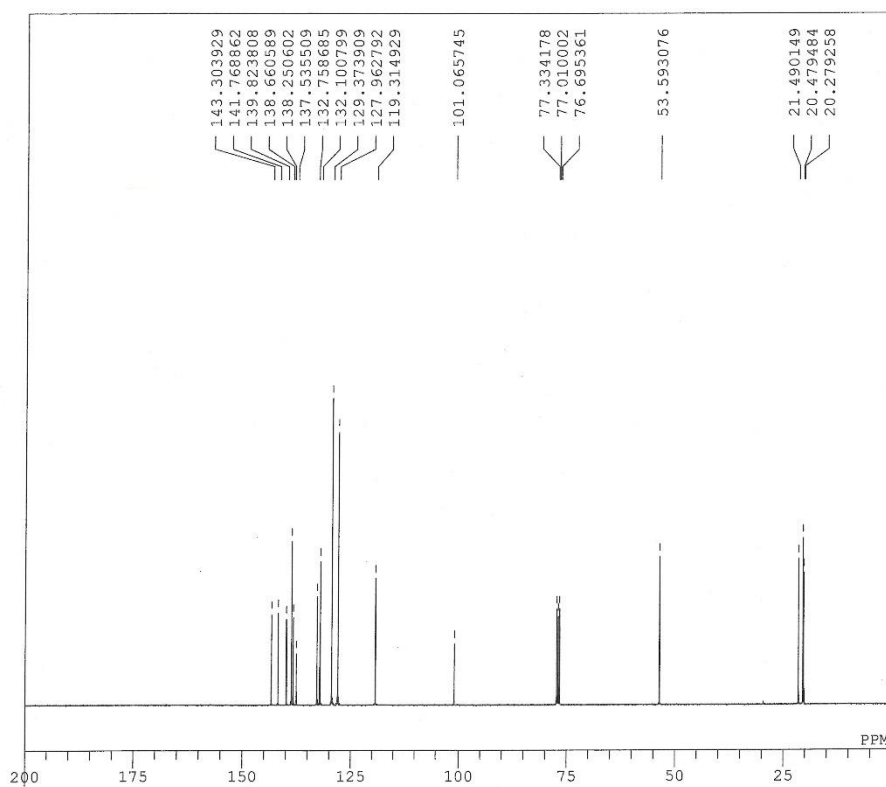

DFILE RK036-13C 20211102-1.als  
 COMNT 2021-11-02 09:27:43  
 OBNUC 13C  
 EXMOD single pulse\_dec  
 OBFRQ 100.53 MHz  
 OBSET 5.35 KHz  
 OBFIN 5.86 Hz  
 POINT 32768  
 FREQU 31407.03 Hz  
 SCANS 1024  
 ACQTM 1.0433 sec  
 PD 2.0000 sec  
 PW1 3.03 usec  
 IRNUC 1H  
 CTEMP 18.5 c  
 SLVNT CDCL3  
 EXREF 77.01 ppm  
 BF 1.20 Hz  
 RGAIN 60

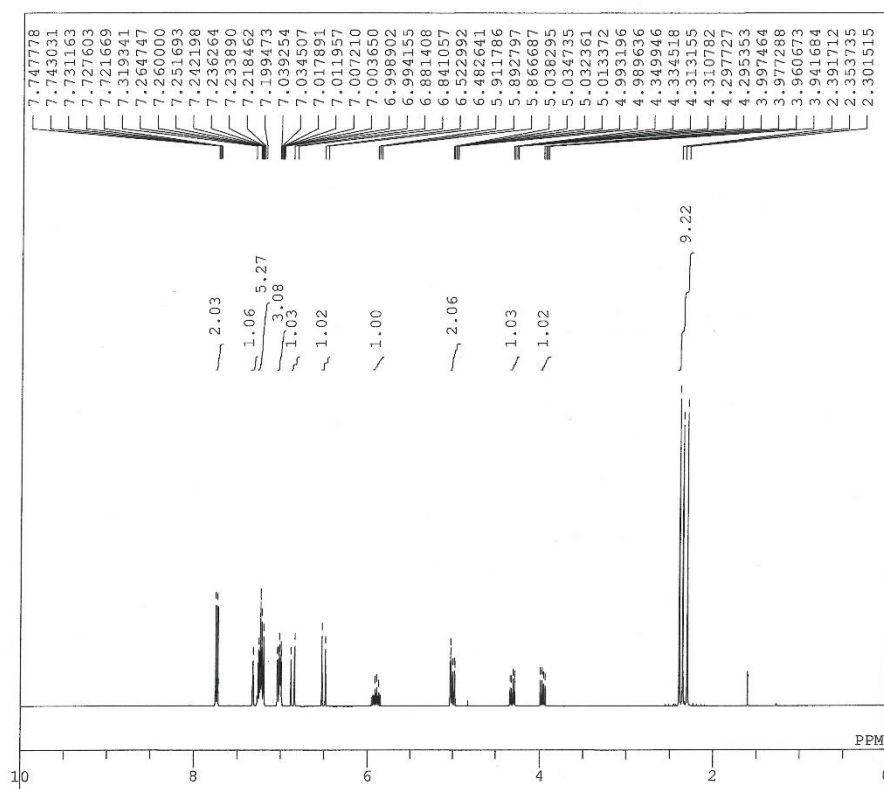

DFILE TT083 20211014-1.als  
 COMNT Qn-BOC 1H  
 DATIM 2021-10-14 15:49:22  
 OBNUC 1H  
 EXMOD single\_pulse.ex2  
 OBFRQ 399.78 MHz  
 OBSET 4.62 KHz  
 OBFIN 5.98 Hz  
 POINT 16384  
 FREQU 7773.63 Hz  
 SCANS 32  
 ACQTM 2.1076 sec  
 PD 5.0000 sec  
 PW1 5.17 usec  
 IRNUC 1H  
 CTEMP 18.6 c  
 SLVNT CDCL3  
 EXREF 7.26 ppm  
 BF 0.12 Hz  
 RGAIN 30

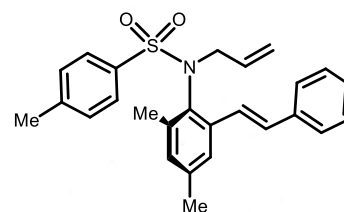

2e

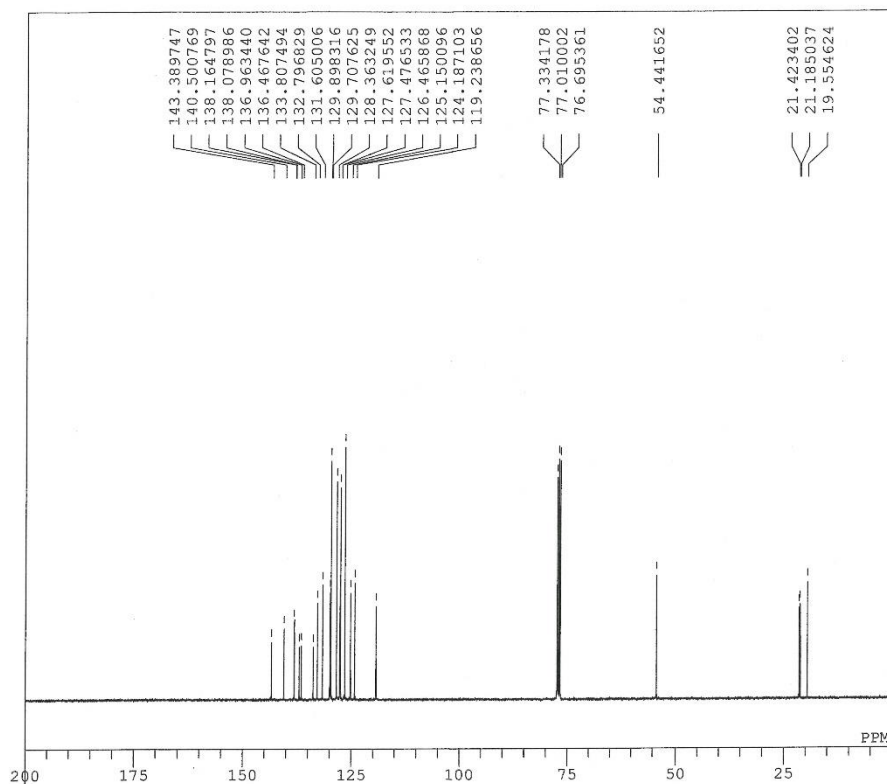

DFILE TT083-13C 20211015-1.als  
 COMNT  
 DATIM 2021-10-15 09:11:14  
 OBNUC 13C  
 EXMOD single\_pulse\_dec  
 OBFRQ 100.53 MHz  
 OBSET 5.35 KHz  
 OBFIN 5.86 Hz  
 POINT 32768  
 FREQU 31407.03 Hz  
 SCANS 1024  
 ACQTM 1.0433 sec  
 PD 2.0000 sec  
 PW1 3.03 usec  
 IRNUC 1H  
 CTEMP 19.0 c  
 SLVNT CDCL3  
 EXREF 77.01 ppm  
 BF 1.20 Hz  
 RGAIN 60

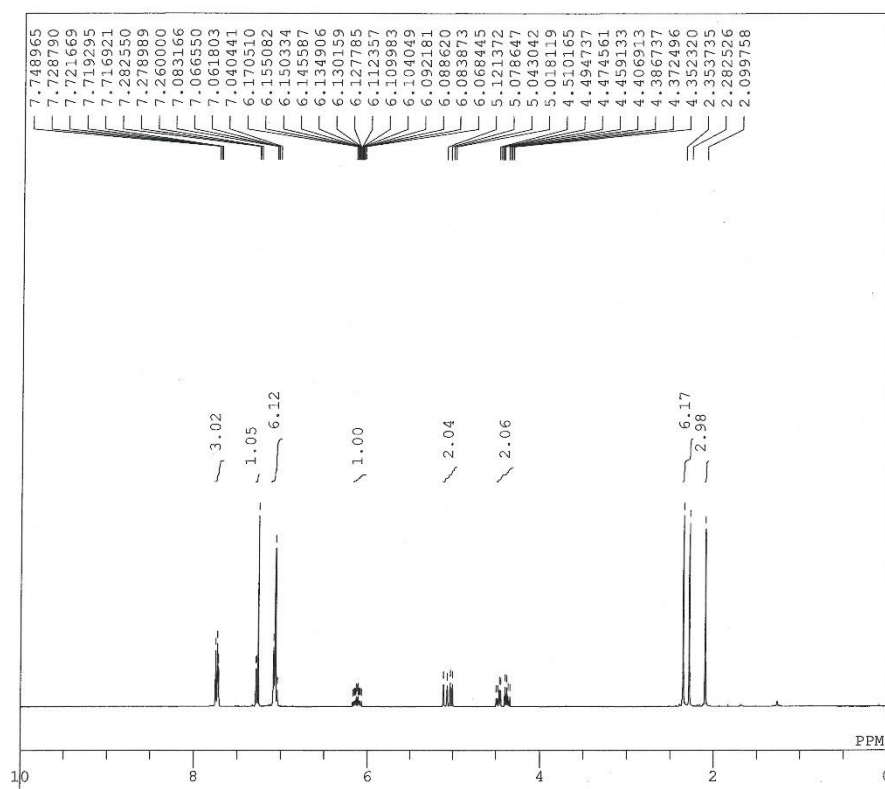

DFILE RK040 20211125-1.als  
 COMNT Qn-BOC 1H  
 DATIM 2021-11-25 14:03:08  
 OBNUC 1H  
 EXMOD single pulse.ex2  
 OBFRQ 399.78 MHz  
 OBSET 4.62 KHz  
 OBFIN 5.98 Hz  
 POINT 16384  
 FREQU 7773.63 Hz  
 SCANS 32  
 ACQTM 2.1076 sec  
 PD 5.0000 sec  
 PW1 5.80 usec  
 IRNUC 1H  
 CTEMP 18.6 c  
 SLVNT CDCL3  
 EXREF 7.26 ppm  
 BF 0.12 Hz  
 RGAIN 26

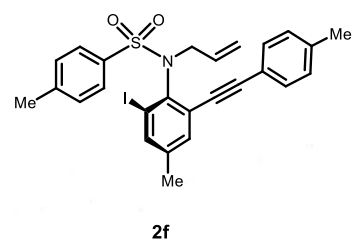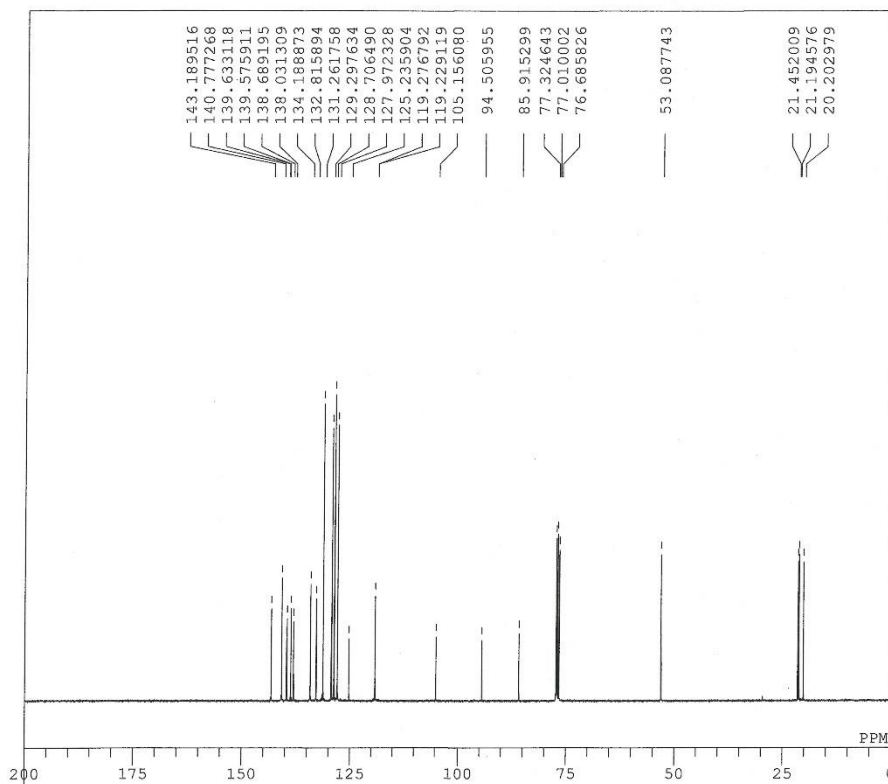

DFILE RK040-13C 20211126-1.jdf  
 COMNT 2021-11-26 17:57:28  
 OBNUC 13C  
 EXMOD single pulse dec  
 OBFRQ 100.53 MHz  
 OBSET 5.35 KHz  
 OBFIN 5.86 Hz  
 POINT 32768  
 FREQU 31407.03 Hz  
 SCANS 1024  
 ACQTM 1.0433 sec  
 PD 2.0000 sec  
 PW1 3.23 usec  
 IRNUC 1H  
 CTEMP 19.3 c  
 SLVNT CDCL3  
 EXREF 77.01 ppm  
 BF 1.20 Hz  
 RGAIN 60



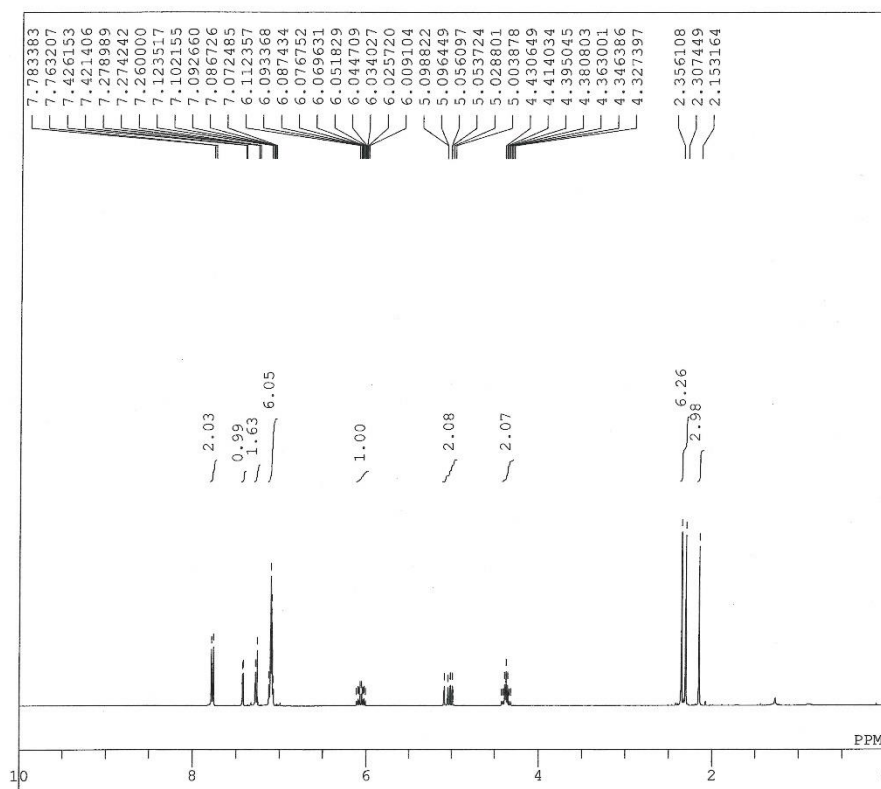

DFILE RK033 20211023-1.als  
 COMNT Qn-BOC 1H  
 DATIM 2021-10-23 12:56:30  
 OBNUC 1H  
 EXMOD single pulse.ex2  
 OBFRQ 399.78 MHz  
 OBSET 4.62 KHz  
 OBFIN 5.98 Hz  
 POINT 13107  
 FREQU 6218.81 Hz  
 SCANS 32  
 ACQTM 2.1076 sec  
 PD 5.0000 sec  
 PW1 5.17 usec  
 IRNUC 1H  
 CTEMP 18.1 c  
 SLVNT CDCL3  
 EXREF 7.26 ppm  
 BF 0.12 Hz  
 RGAIN 22

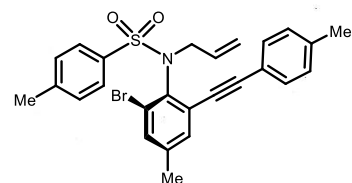

2g

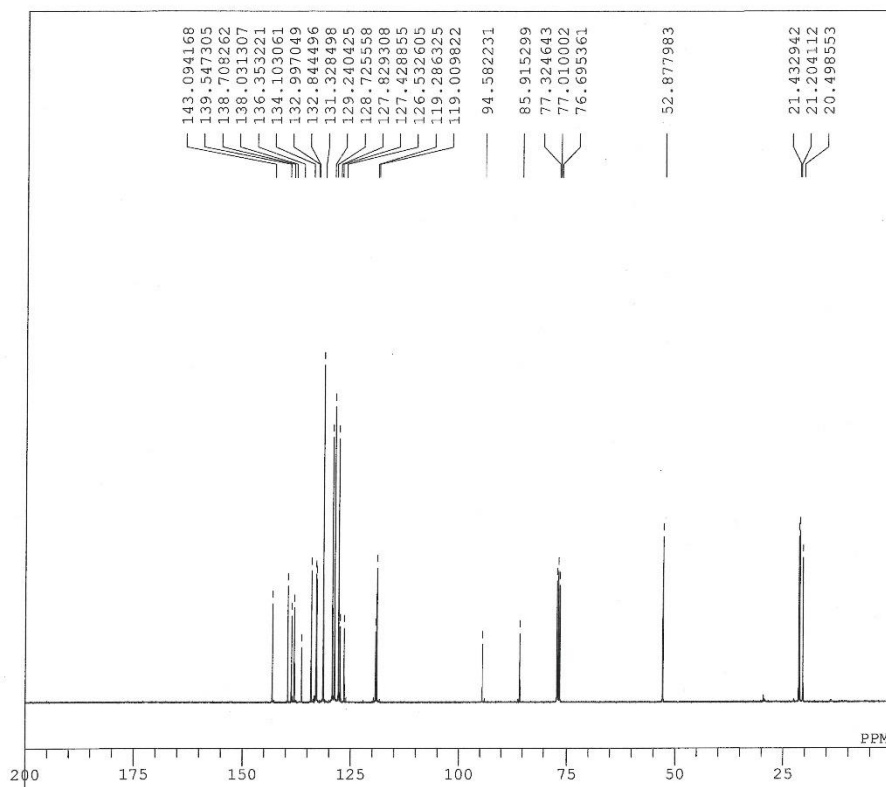

DFILE RK033-13C 20211023-1.als  
 COMNT  
 DATIM 2021-10-23 10:49:27  
 OBNUC 13C  
 EXMOD single pulse\_dec  
 OBFRQ 100.53 MHz  
 OBSET 5.35 KHz  
 OBFIN 5.86 Hz  
 POINT 26214  
 FREQU 25125.24 Hz  
 SCANS 1024  
 ACQTM 1.0433 sec  
 PD 2.0000 sec  
 PW1 3.03 usec  
 IRNUC 1H  
 CTEMP 18.0 c  
 SLVNT CDCL3  
 EXREF 77.01 ppm  
 BF 1.20 Hz  
 RGAIN 60

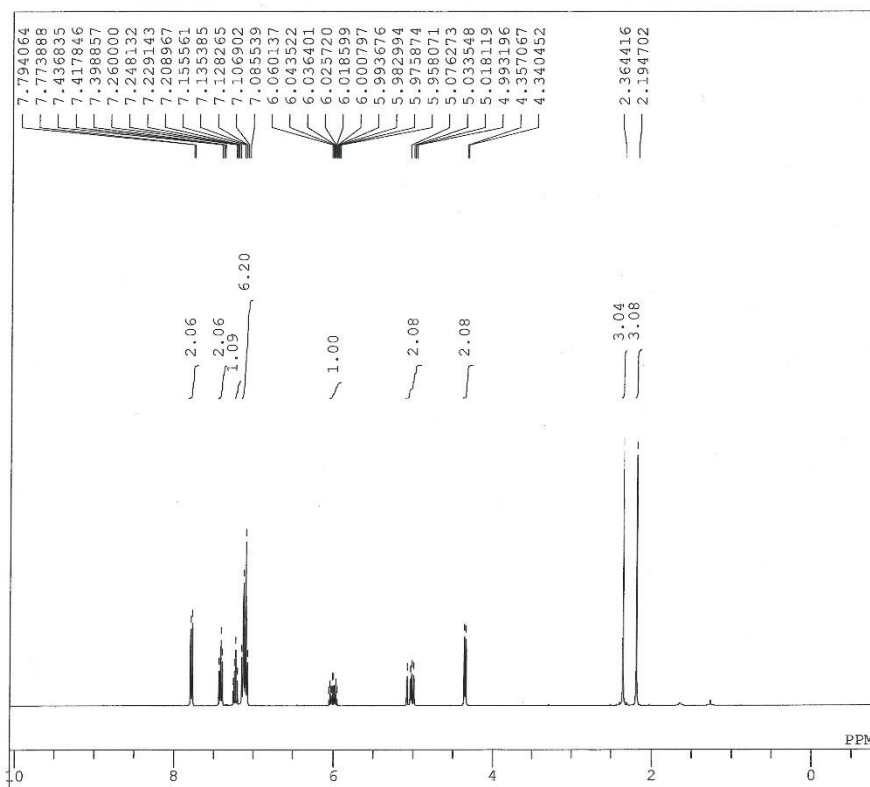

DFILE SF108 20210916-1.als  
 COMNT Qn-BOC 1H  
 DATIM 2021-09-16 15:42:12  
 OBNUC 1H  
 EXMOD single pulse.ex2  
 OBFRQ 399.78 MHz  
 OBSET 4.62 KHz  
 OBFIN 5.98 Hz  
 POINT 16384  
 FREQU 7773.63 Hz  
 SCANS 32  
 ACQTM 2.1076 sec  
 PD 5.0000 sec  
 PW1 5.17 usec  
 IRNUC 1H  
 CTEMP 19.1 c  
 SLVNT CDCL3  
 EXREF 7.26 ppm  
 BF 0.12 Hz  
 RGAIN 30

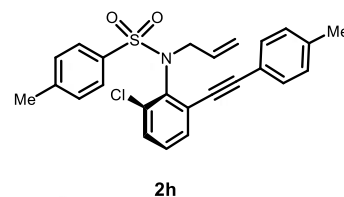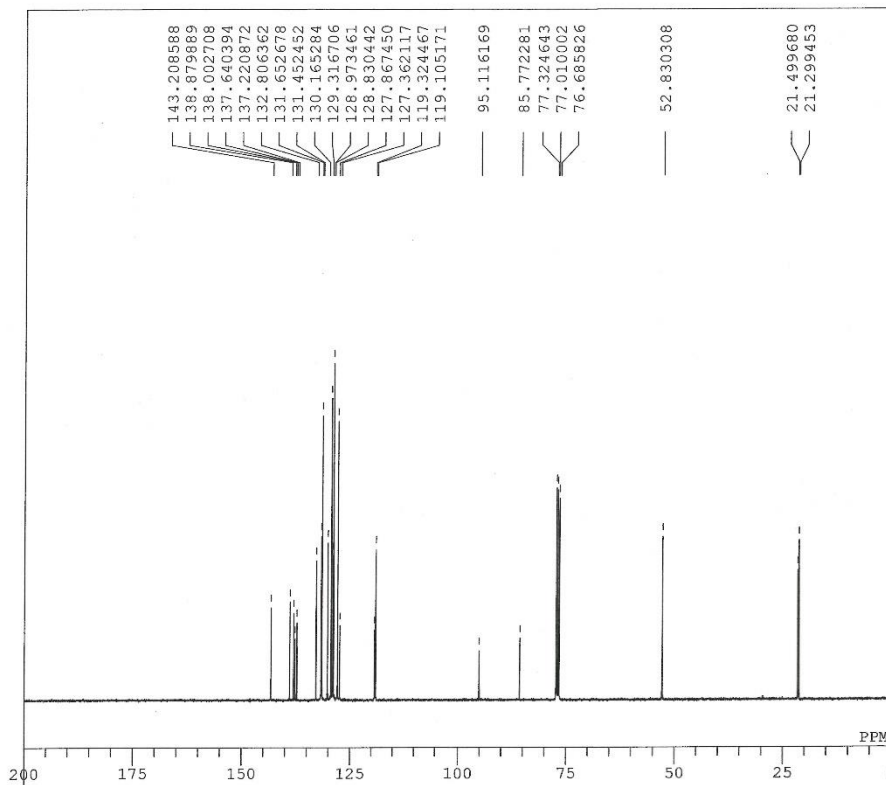

DFILE SF108-13C 20210916-1.als  
 COMNT  
 DATIM 2021-09-16 18:27:37  
 OBNUC 13C  
 EXMOD single pulse\_dec  
 OBFRQ 100.53 MHz  
 OBSET 5.35 KHz  
 OBFIN 5.86 Hz  
 POINT 32768  
 FREQU 31407.03 Hz  
 SCANS 1024  
 ACQTM 1.0433 sec  
 PD 2.0000 sec  
 PW1 3.03 usec  
 IRNUC 1H  
 CTEMP 19.3 c  
 SLVNT CDCL3  
 EXREF 77.01 ppm  
 BF 1.20 Hz  
 RGAIN 60



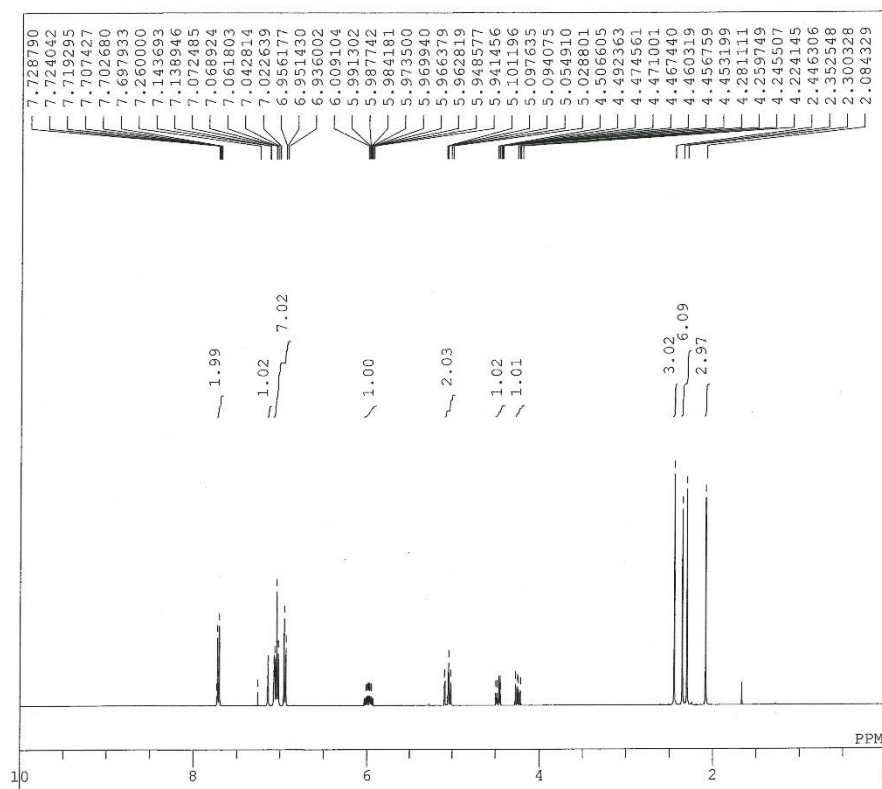

DFILE SF075 20211008-1.als  
 COMNT Qn-BOC 1H  
 DATIM 2021-10-08 14:09:18  
 OBNUC 1H  
 EXMOD single\_pulse.ex2  
 OBFRQ 399.78 MHz  
 OBSET 4.62 KHz  
 OBFIN 5.98 Hz  
 POINT 16384  
 FREQU 7773.63 Hz  
 SCANS 32  
 ACQTM 2.1076 sec  
 PD 5.0000 sec  
 PW1 5.17 usec  
 IRNUC 1H  
 CTEMP 18.5 c  
 SLVNT CDCL3  
 EXREF 7.26 ppm  
 BF 0.12 Hz  
 RGAIN 26

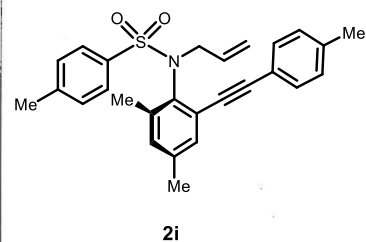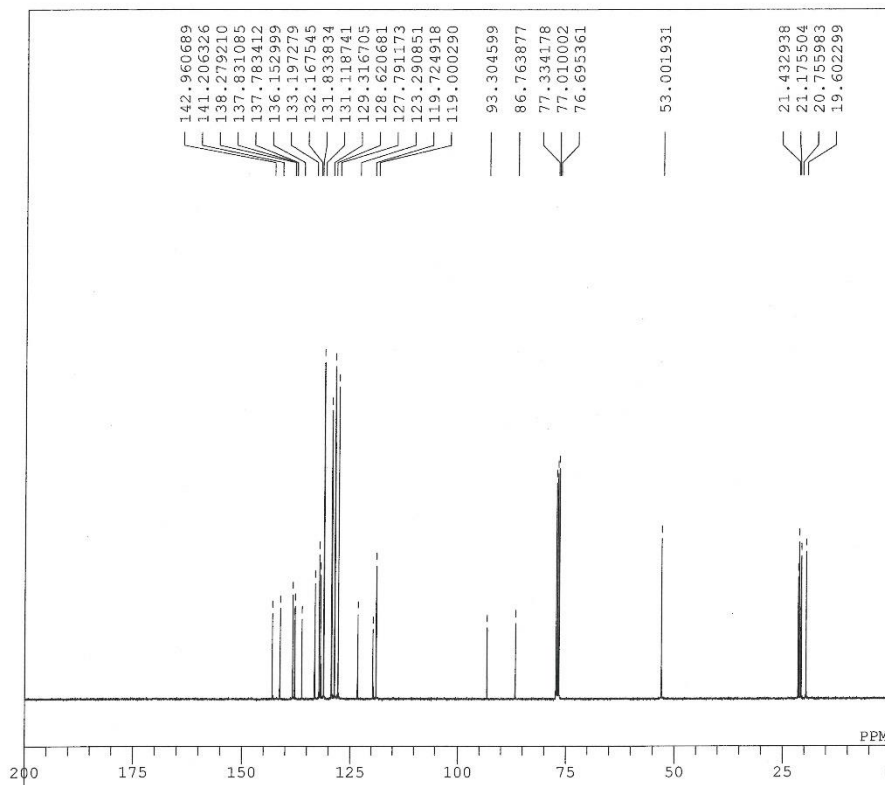

DFILE SF075-13C 20211004-1.als  
 COMNT  
 DATIM 2021-10-04 18:03:09  
 OBNUC 13C  
 EXMOD single\_pulse\_dec  
 OBFRQ 100.53 MHz  
 OBSET 5.35 KHz  
 OBFIN 5.86 Hz  
 POINT 32768  
 FREQU 31407.03 Hz  
 SCANS 1024  
 ACQTM 1.0433 sec  
 PD 2.0000 sec  
 PW1 3.03 usec  
 IRNUC 1H  
 CTEMP 18.5 c  
 SLVNT CDCL3  
 EXREF 77.01 ppm  
 BF 1.20 Hz  
 RGAIN 60

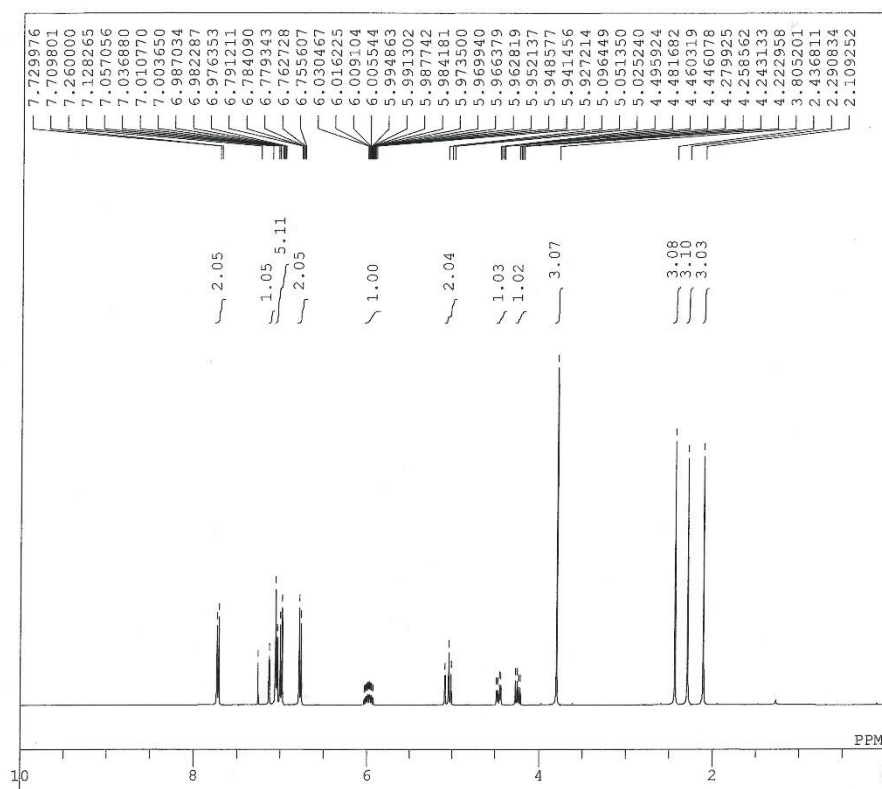

DFILE TF012 20210930-1.als  
 COMNT Qn-BOC 1H  
 DATIM 2021-09-30 10:08:27  
 OBNUC 1H  
 EXMOD single\_pulse.ex2  
 OBFRQ 399.78 MHz  
 OBSET 4.62 KHz  
 OBFIN 5.98 Hz  
 POINT 16384  
 FREQU 7773.63 Hz  
 SCANS 32  
 ACQTM 2.1076 sec  
 PD 5.0000 sec  
 PW1 5.17 usec  
 IRNUC 1H  
 CTEMP 19.0 c  
 SLVNT CDCL3  
 EXREF 7.26 ppm  
 BF 0.12 Hz  
 RGAIN 22

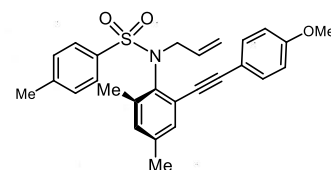

2j

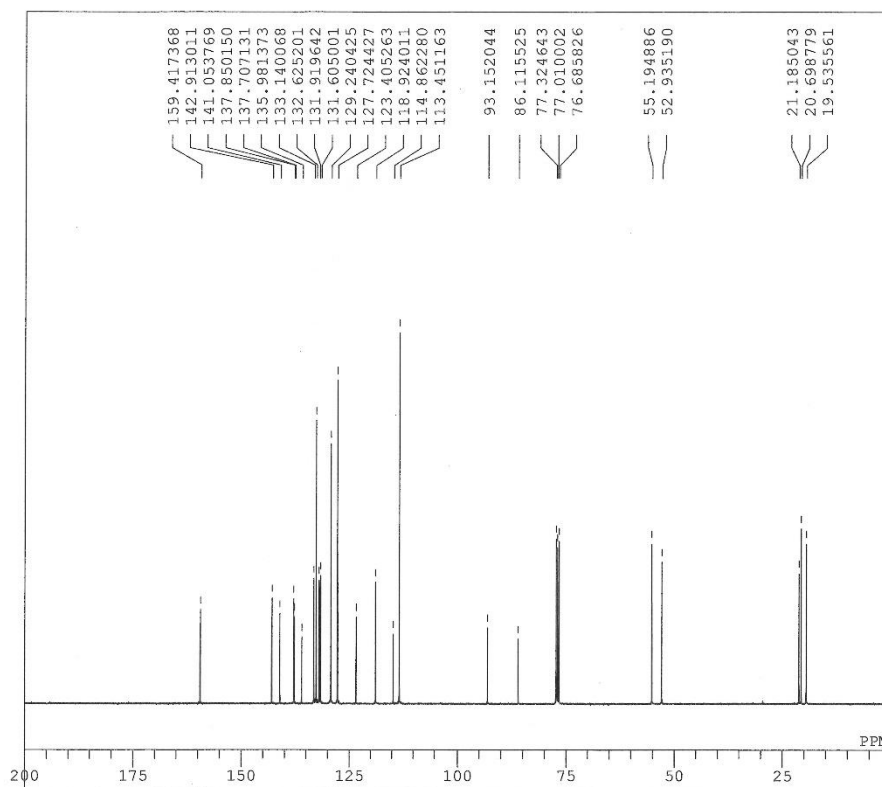

DFILE TF012-13C 20211002-1.als  
 COMNT  
 DATIM 2021-10-02 10:52:49  
 OBNUC 13C  
 EXMOD single\_pulse\_dec  
 OBFRQ 100.53 MHz  
 OBSET 5.35 KHz  
 OBFIN 5.86 Hz  
 POINT 26214  
 FREQU 25125.24 Hz  
 SCANS 1024  
 ACQTM 1.0433 sec  
 PD 2.0000 sec  
 PW1 3.03 usec  
 IRNUC 1H  
 CTEMP 18.5 c  
 SLVNT CDCL3  
 EXREF 77.01 ppm  
 BF 1.20 Hz  
 RGAIN 60

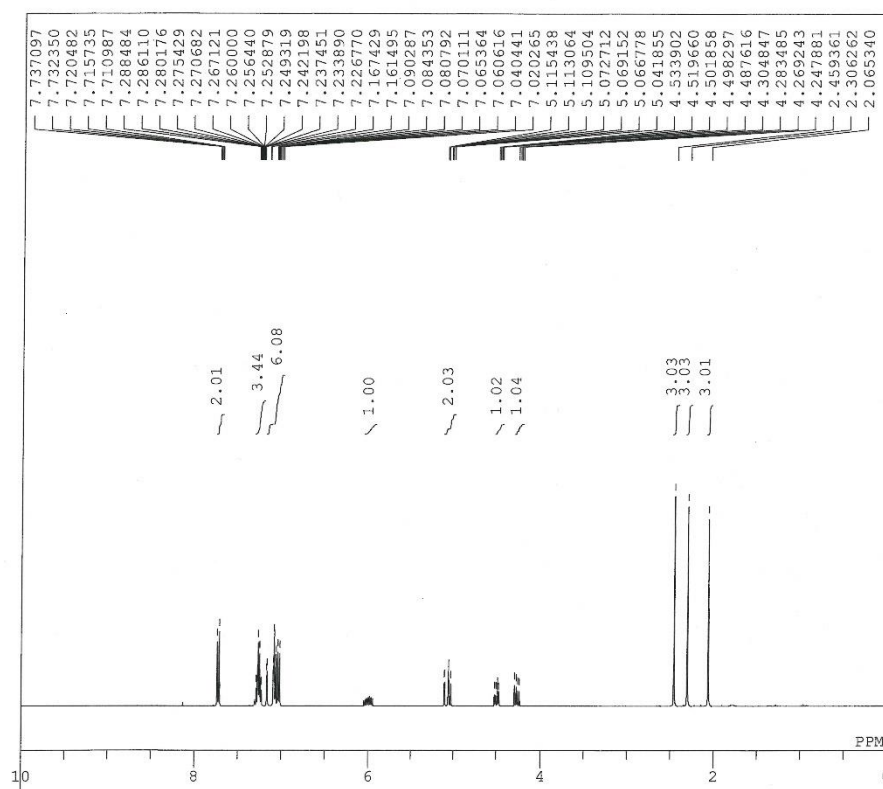

DFILE Y0021 20210927-1.als  
 COMNT Qn-BOC 1H  
 DATIM 2021-09-27 11:10:30  
 OBNUC 1H  
 EXMOD single pulse.ex2  
 OBFRQ 399.78 MHz  
 OBSET 4.62 KHz  
 OBFIN 5.98 Hz  
 POINT 16384  
 FREQU 7773.63 Hz  
 SCANS 32  
 ACQTM 2.1076 sec  
 PD 5.0000 sec  
 PW1 5.17 usec  
 IRNUC 1H  
 CTEMP 18.7 c  
 SLVNT CDCL3  
 EXREF 7.26 ppm  
 BF 0.12 Hz  
 RGAIN 20

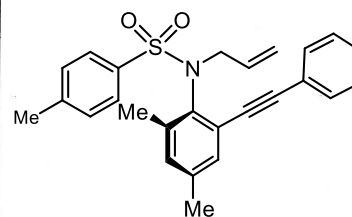

**2k**

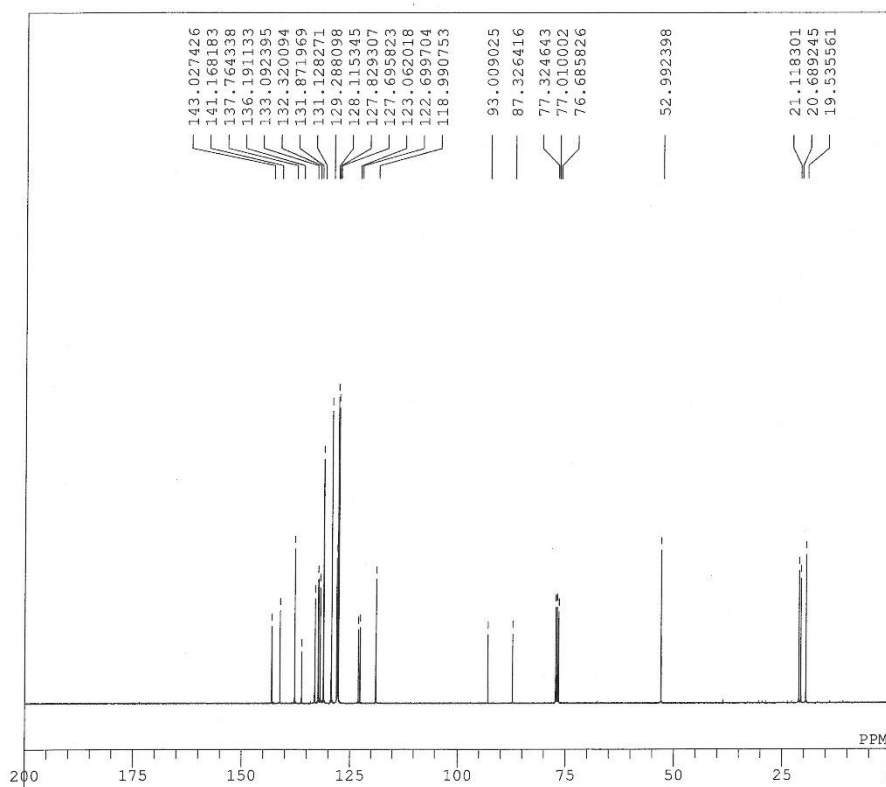

DFILE Y0021-13C 20210924-1.ais  
 COMNT  
 DATIM 2021-09-24 18:08:11  
 OBNUC 13C  
 EXMOD single pulse\_dec  
 OBFRQ 100.53 MHz  
 OBSET 5.35 KHz  
 OBFIN 5.86 Hz  
 POINT 32768  
 FREQU 31407.03 Hz  
 SCANS 1024  
 ACQTM 1.0433 sec  
 PD 2.0000 sec  
 PW1 3.03 usec  
 IRNUC 1H  
 CTEMP 19.5 c  
 SLVNT CDCL3  
 EXREF 77.01 ppm  
 BF 1.20 Hz  
 RGAIN 60

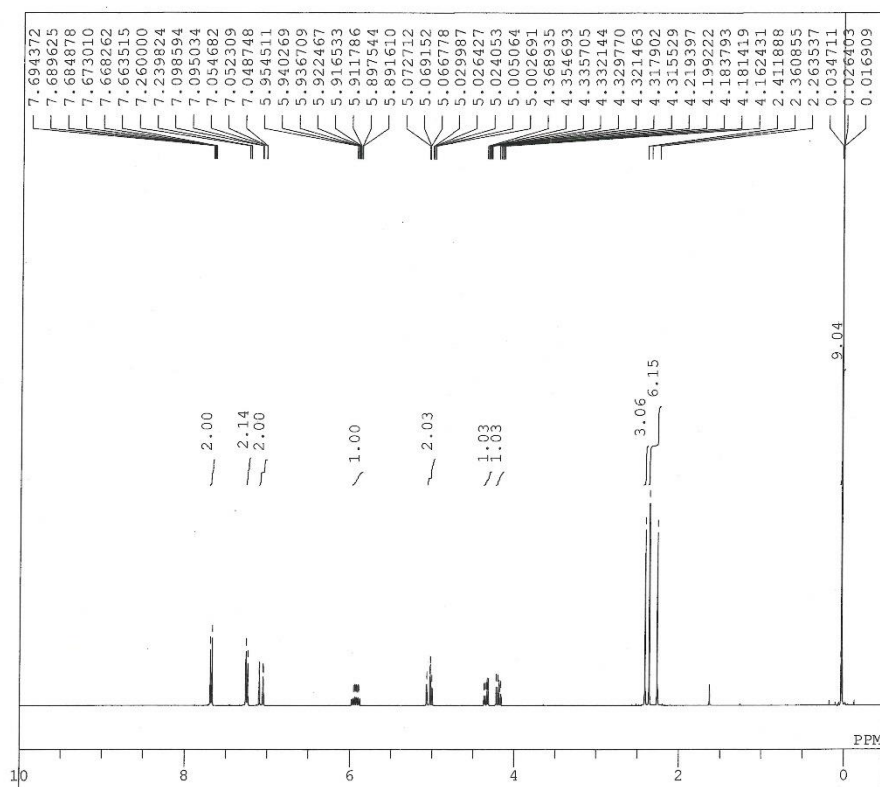

DFILE TT064 20211123-1.als  
 COMNT Qn-BOC 1H  
 DATIM 2021-11-23 14:49:48  
 OBNUC 1H  
 EXMOD single\_pulse.ex2  
 OBFREQ 399.78 MHz  
 OBSET 4.62 KHz  
 OBFIN 5.98 Hz  
 POINT 13107  
 FREQU 6218.81 Hz  
 SCANS 32  
 ACQTM 2.1076 sec  
 PD 5.0000 sec  
 PW1 5.80 usec  
 IRNUC 1H  
 CTEMP 18.8 c  
 SLVNT CDCL3  
 EXREF 7.26 ppm  
 BF 0.12 Hz  
 RGAIN 30

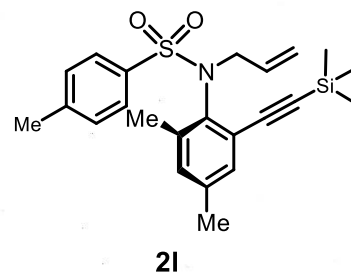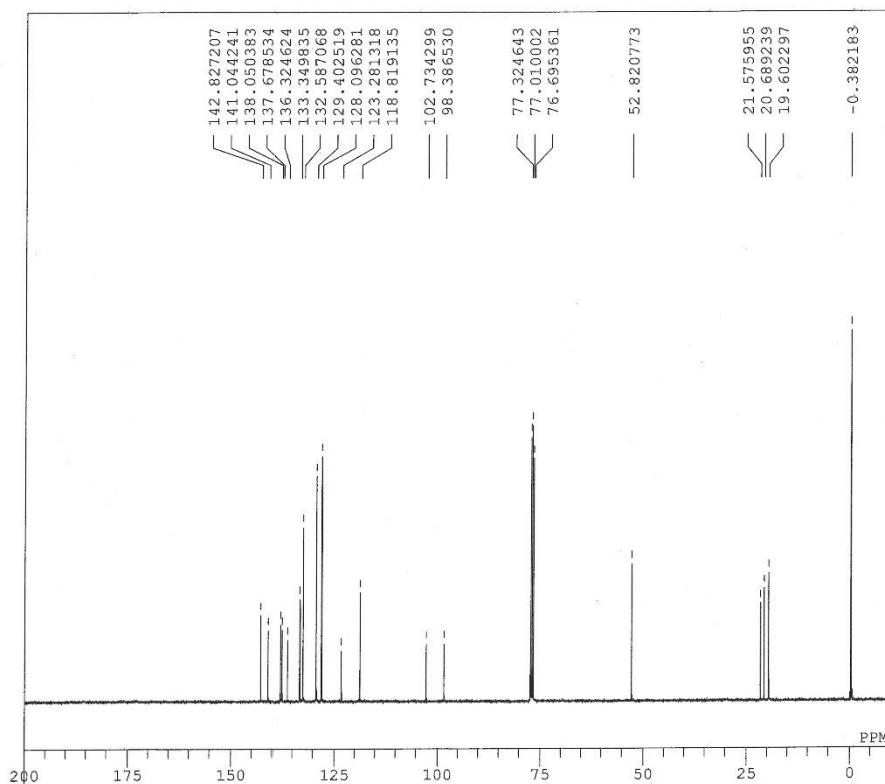

DFILE TT064-13C 20211123-1.als  
 COMNT  
 DATIM 2021-11-23 18:01:60  
 OBNUC 13C  
 EXMOD single\_pulse\_dec  
 OBFREQ 100.53 MHz  
 OBSET 5.35 KHz  
 OBFIN 5.86 Hz  
 POINT 32768  
 FREQU 31407.03 Hz  
 SCANS 1024  
 ACQTM 1.0433 sec  
 PD 2.0000 sec  
 PW1 3.23 usec  
 IRNUC 1H  
 CTEMP 19.1 c  
 SLVNT CDCL3  
 EXREF 77.01 ppm  
 BF 1.20 Hz  
 RGAIN 60

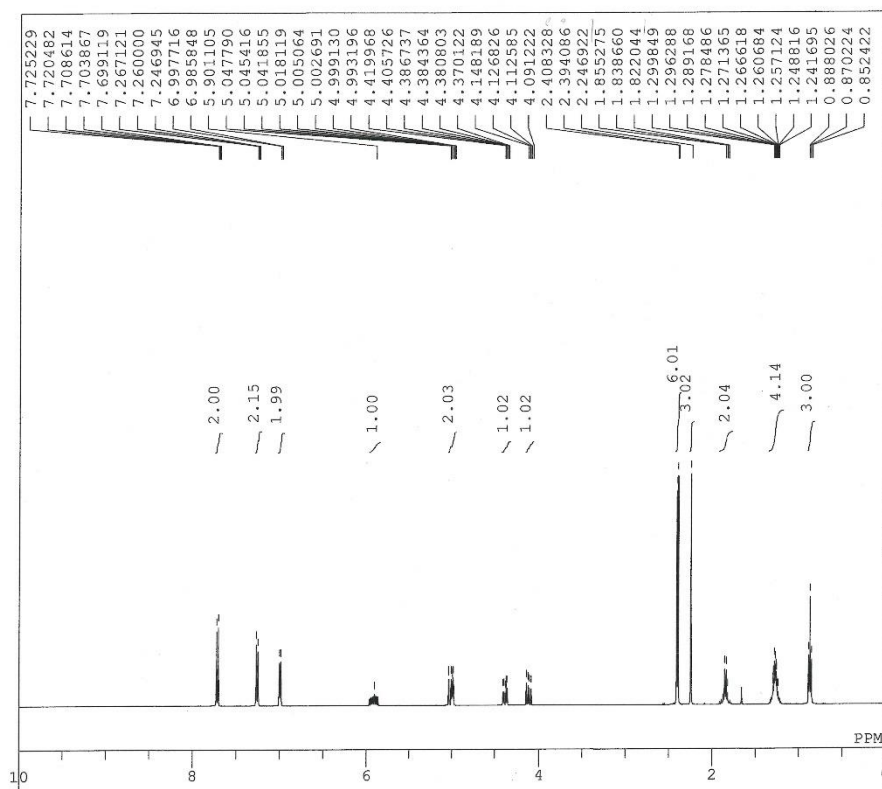

DFILE SF138 20211121-1.jdf  
 COMNT Qn-BOC 1H  
 DATIM 2021-11-21 17:14:58  
 OBNUC 1H  
 EXMOD single pulse.ex2  
 OBFRQ 399.78 MHz  
 OBSET 4.62 KHz  
 OBFIN 5.98 Hz  
 POINT 16384  
 FREQU 7773.63 Hz  
 SCANS 32  
 ACQTM 2.1076 sec  
 PD 5.0000 sec  
 PW1 5.80 usec  
 IRNUC 1H  
 CTEMP 18.5 c  
 SLVNT CDCL3  
 EXREF 7.26 ppm  
 BF 0.12 Hz  
 RGAIN 26

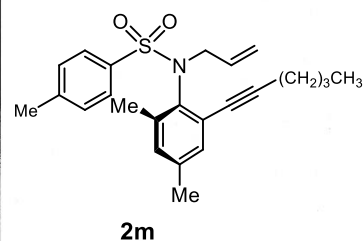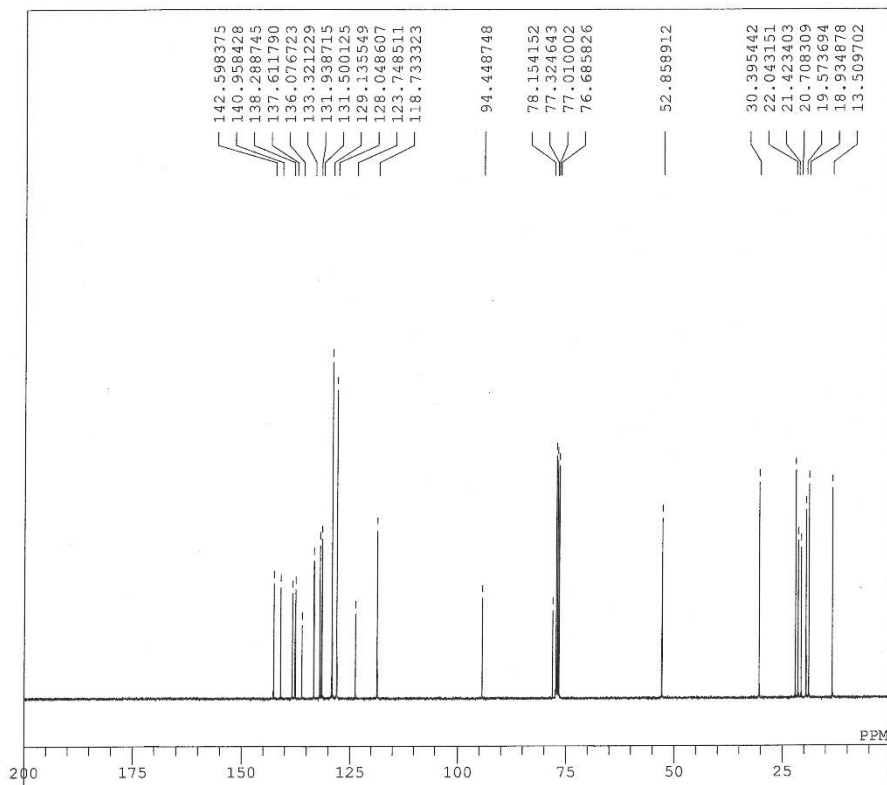

DFILE SF138-13C 20211121-1.jdf  
 COMNT  
 DATIM 2021-11-21 17:01:13  
 OBNUC 13C  
 EXMOD single pulse\_dec  
 OBFRQ 100.53 MHz  
 OBSET 5.35 KHz  
 OBFIN 5.86 Hz  
 POINT 32768  
 FREQU 31407.03 Hz  
 SCANS 1024  
 ACQTM 1.0433 sec  
 PD 2.0000 sec  
 PW1 3.23 usec  
 IRNUC 1H  
 CTEMP 19.0 c  
 SLVNT CDCL3  
 EXREF 77.01 ppm  
 BF 1.20 Hz  
 RGAIN 60

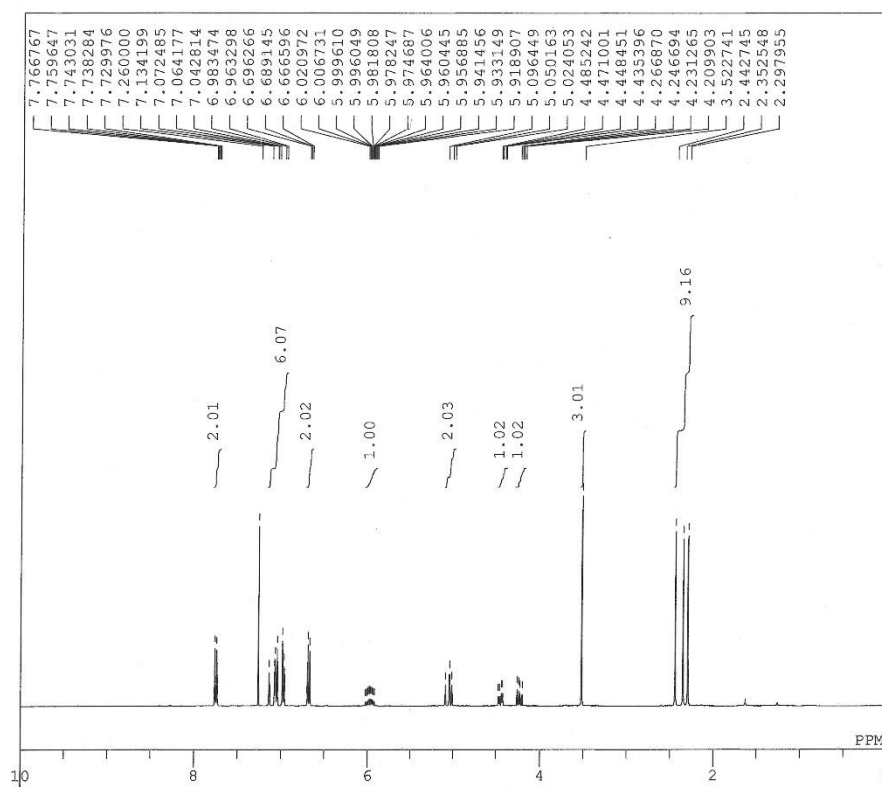

DFILE TF008 20211203 sin-1.als  
 COMNT Qn-BOC 1H  
 DATIM 2021-12-03 15:28:44  
 OBNUC 1H  
 EXMOD single\_pulse.ex2  
 OBFRQ 399.78 MHz  
 OBSET 4.62 KHz  
 OBFIN 5.98 Hz  
 POINT 13107  
 FREQU 6218.81 Hz  
 SCANS 32  
 ACQTM 2.1076 sec  
 PD 5.0000 sec  
 PW1 5.80 usec  
 IRNUC 1H  
 CTEMP 18.6 c  
 SLVNT CDCL3  
 EXREF 7.26 ppm  
 BF 0.12 Hz  
 RGAIN 30

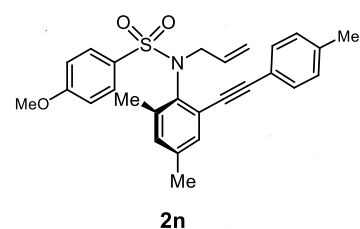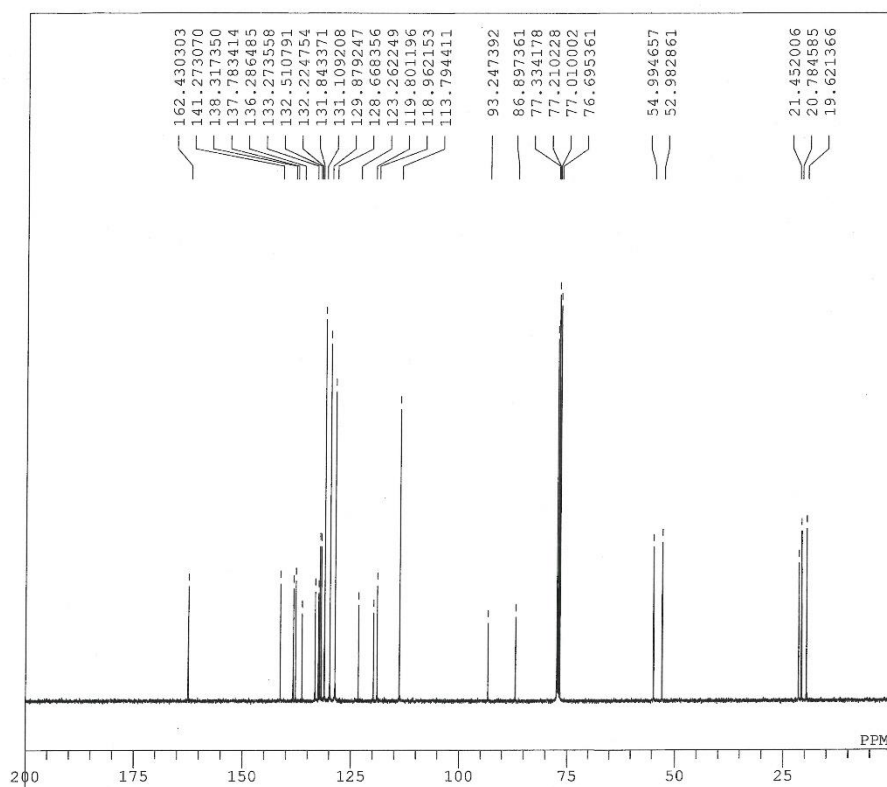

DFILE TF008 13C 20211204-1.als  
 COMNT 2021-12-04 10:39:27  
 OBNUC 13C  
 EXMOD single\_pulse\_dec  
 OBFRQ 100.53 MHz  
 OBSET 5.35 KHz  
 OBFIN 5.86 Hz  
 POINT 32768  
 FREQU 31407.03 Hz  
 SCANS 1024  
 ACQTM 1.0433 sec  
 PD 2.0000 sec  
 PW1 3.23 usec  
 IRNUC 1H  
 CTEMP 18.4 c  
 SLVNT CDCL3  
 EXREF 77.01 ppm  
 BF 1.20 Hz  
 RGAIN 60



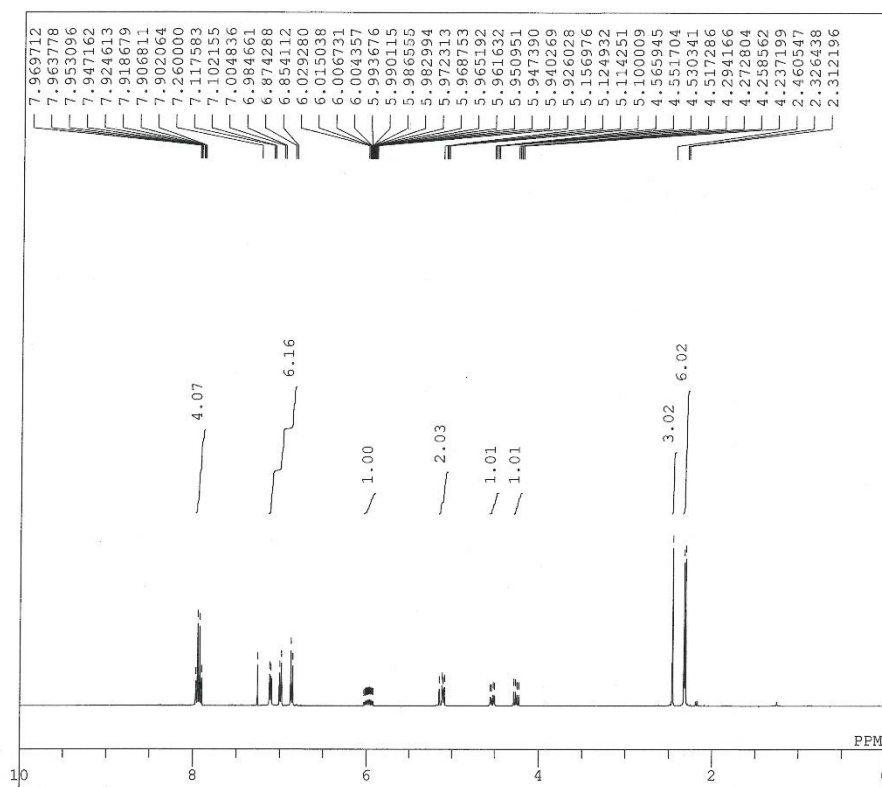

DFILE TT011 20211204-1.als  
 COMNT Qn-BOC 1H  
 DATIM 2021-12-04 10:51:14  
 OBNUC 1H  
 EXMOD single pulse.ex2  
 OBFRQ 399.78 MHz  
 OBSET 4.62 KHz  
 OBFIN 5.98 Hz  
 POINT 13107  
 FREQU 6218.81 Hz  
 SCANS 32  
 ACQTM 2.1076 sec  
 PD 5.0000 sec  
 PW1 5.80 usec  
 IRNUC 1H  
 CTEMP 18.0 c  
 SLVNT CDCL3  
 EXREF 7.26 ppm  
 BF 0.12 Hz  
 RGAIN 30

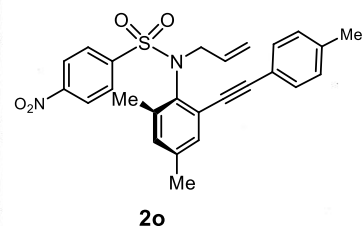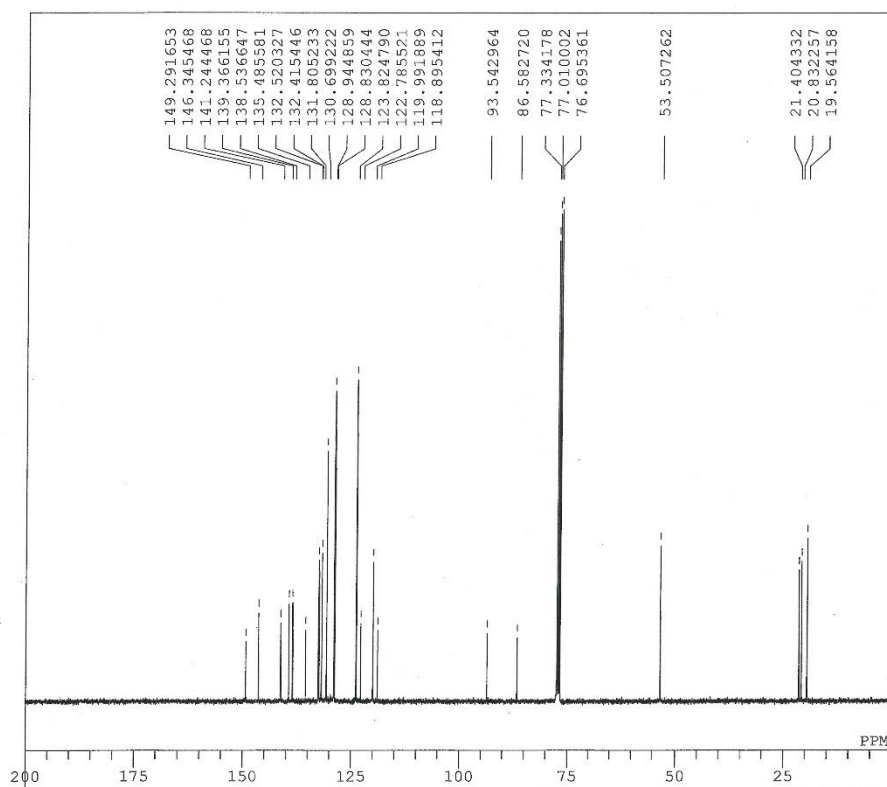

DFILE TT011 13C 20211203-1.als  
 COMNT  
 DATIM 2021-12-03 09:32:53  
 OBNUC 13C  
 EXMOD single pulse\_dec  
 OBFRQ 100.53 MHz  
 OBSET 5.35 KHz  
 OBFIN 5.86 Hz  
 POINT 26214  
 FREQU 25125.24 Hz  
 SCANS 1024  
 ACQTM 1.0433 sec  
 PD 2.0000 sec  
 PW1 3.23 usec  
 IRNUC 1H  
 CTEMP 17.6 c  
 SLVNT CDCL3  
 EXREF 77.01 ppm  
 BF 1.20 Hz  
 RGAIN 60

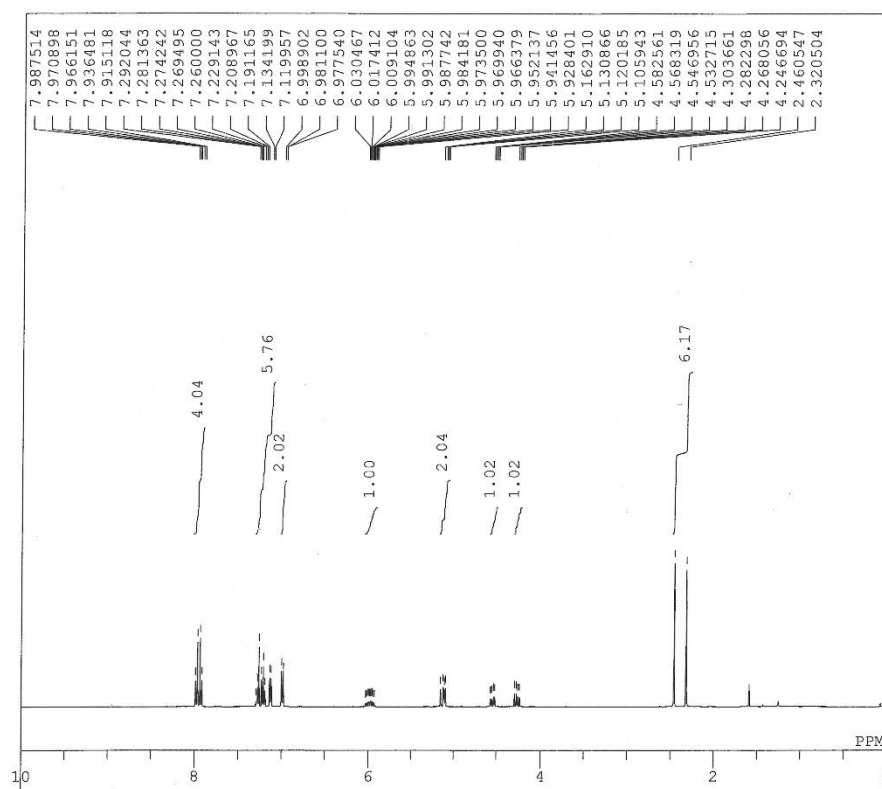

DFILE RK020 20211129-1.als  
 COMNT Qn-BOC 1H  
 DATIM 2021-11-29 12:21:25  
 OBNUC 1H  
 EXMOD single\_pulse.ex2  
 OBFRQ 399.78 MHz  
 OBSET 4.62 KHz  
 OBFIN 5.98 Hz  
 POINT 13107  
 FREQU 6218.81 Hz  
 SCANS 32  
 ACQTM 2.1076 sec  
 PD 5.0000 sec  
 PW1 5.80 usec  
 IRNUC 1H  
 CTEMP 17.9 c  
 SLVNT CDCL3  
 EXREF 7.26 ppm  
 BF 0.12 Hz  
 RGAIN 30

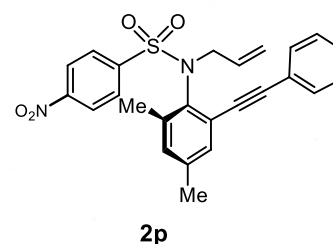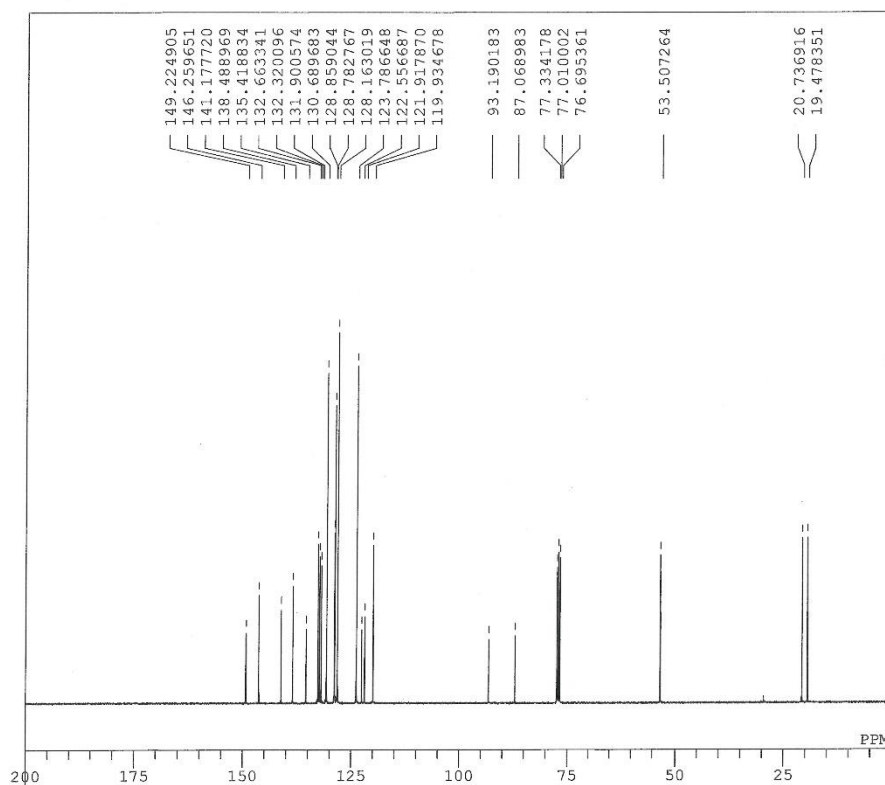

DFILE SF094 13C 20211202-1.als  
 COMNT  
 DATIM 2021-12-02 09:37:24  
 OBNUC 13C  
 EXMOD single\_pulse\_dec  
 OBFRQ 100.53 MHz  
 OBSET 5.35 KHz  
 OBFIN 5.86 Hz  
 POINT 26214  
 FREQU 25125.24 Hz  
 SCANS 1024  
 ACQTM 1.0433 sec  
 PD 2.0000 sec  
 PW1 3.23 usec  
 IRNUC 1H  
 CTEMP 17.9 c  
 SLVNT CDCL3  
 EXREF 77.01 ppm  
 BF 1.20 Hz  
 RGAIN 60



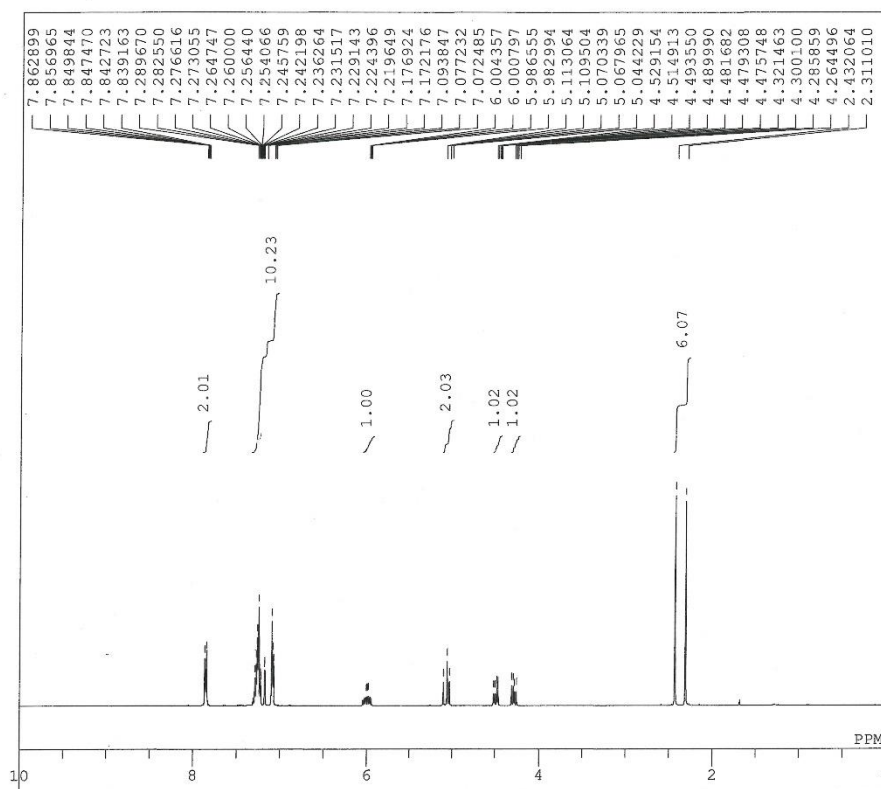

DFILE SF122 20210927-1.als  
 COMNT Qn-BOC 1H  
 DATIM 2021-09-27 11:33:23  
 OBNUC 1H  
 EXMOD single pulse.ex2  
 OBFRQ 399.78 MHz  
 OBSET 4.62 KHz  
 OBFIN 5.98 Hz  
 POINT 13107  
 FREQU 6218.81 Hz  
 SCANS 32  
 ACQTM 2.1076 sec  
 PD 5.0000 sec  
 PW1 5.17 usec  
 IRNUC 1H  
 CTEMP 18.9 c  
 SLVNT CDCL3  
 EXREF 7.26 ppm  
 BF 0.12 Hz  
 RGAIN 22

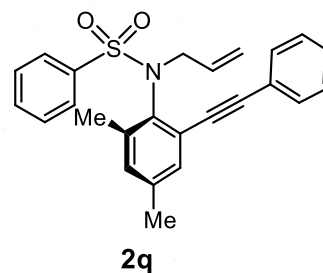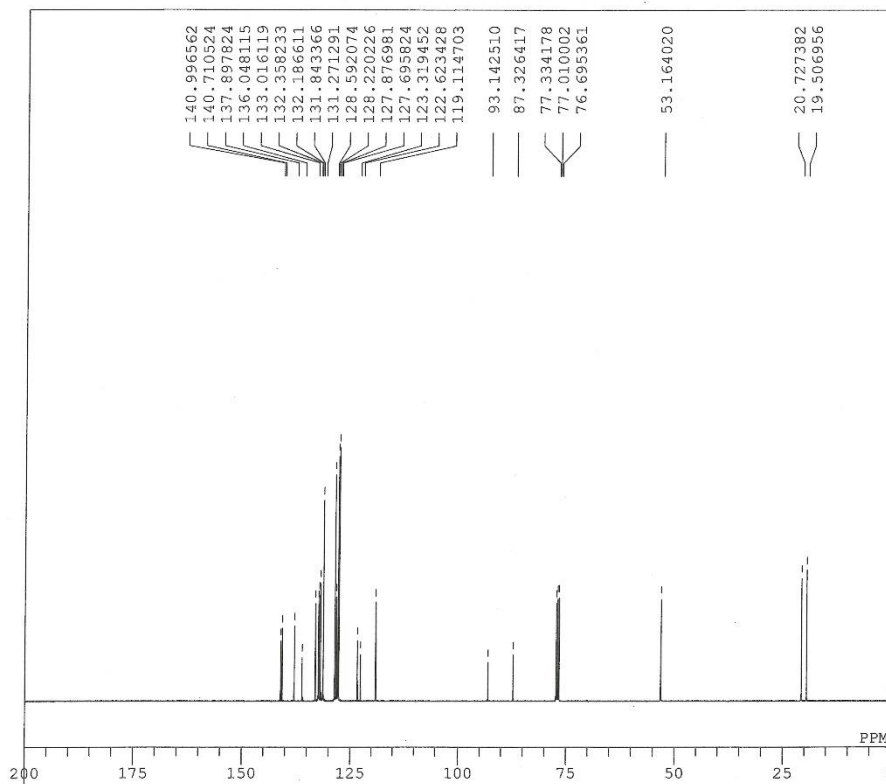

DFILE SF122-13C 20210928-1.als  
 COMNT 2021-09-28 09:45:01  
 OBNUC 13C  
 EXMOD single pulse\_dec  
 OBFRQ 100.53 MHz  
 OBSET 5.35 KHz  
 OBFIN 5.86 Hz  
 POINT 26214  
 FREQU 25125.24 Hz  
 SCANS 1024  
 ACQTM 1.0433 sec  
 PD 2.0000 sec  
 PW1 3.03 usec  
 IRNUC 1H  
 CTEMP 19.2 c  
 SLVNT CDCL3  
 EXREF 77.01 ppm  
 BF 1.20 Hz  
 RGAIN 60

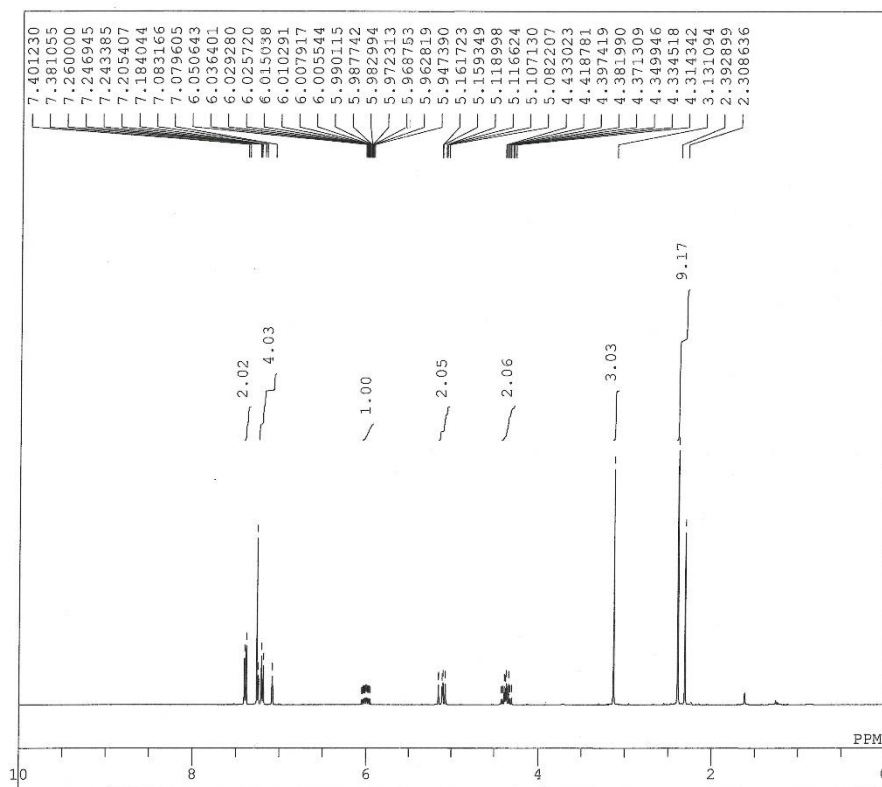

DFILE SF094 20211129-1.als  
 COMNT Qn-BOC 1H  
 DATIM 2021-11-29 12:09:12  
 OBNUC 1H  
 EXMOD single pulse.ex2  
 OBFRQ 399.78 MHz  
 OBSET 4.62 KHz  
 OBFIN 5.98 Hz  
 POINT 13107  
 FREQU 6218.81 Hz  
 SCANS 32  
 ACQTM 2.1076 sec  
 PD 5.0000 sec  
 PW1 5.80 usec  
 IRNUC 1H  
 CTEMP 17.6 c  
 SLVNT CDCL3  
 EXREF 7.26 ppm  
 BF 0.12 Hz  
 RGAIN 30

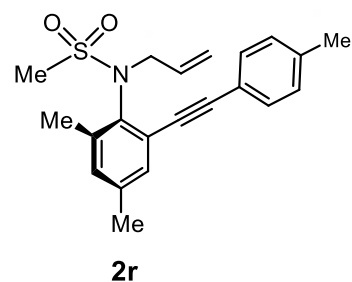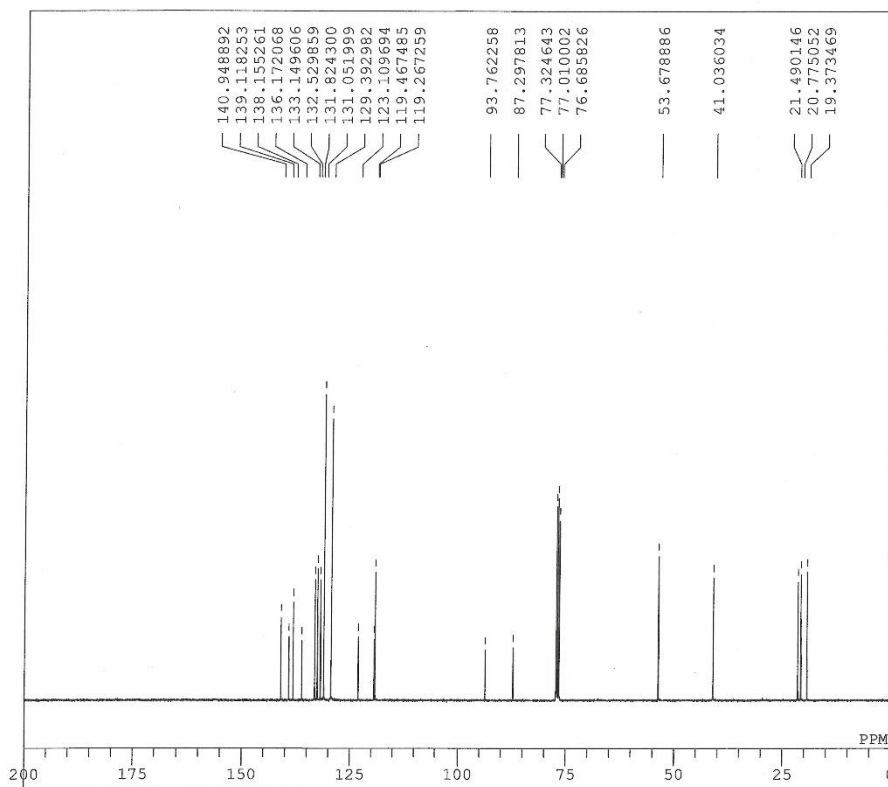

DFILE RK020 13C 20211201-1.als  
 COMNT 2021-12-01 19:42:38  
 OBNUC 13C  
 EXMOD single pulse\_dec  
 OBFRQ 100.53 MHz  
 OBSET 5.35 KHz  
 OBFIN 5.86 Hz  
 POINT 26214  
 FREQU 25125.24 Hz  
 SCANS 1024  
 ACQTM 1.0433 sec  
 PD 2.0000 sec  
 PW1 3.23 usec  
 IRNUC 1H  
 CTEMP 18.8 c  
 SLVNT CDCL3  
 EXREF 77.01 ppm  
 BF 1.20 Hz  
 RGAIN 60

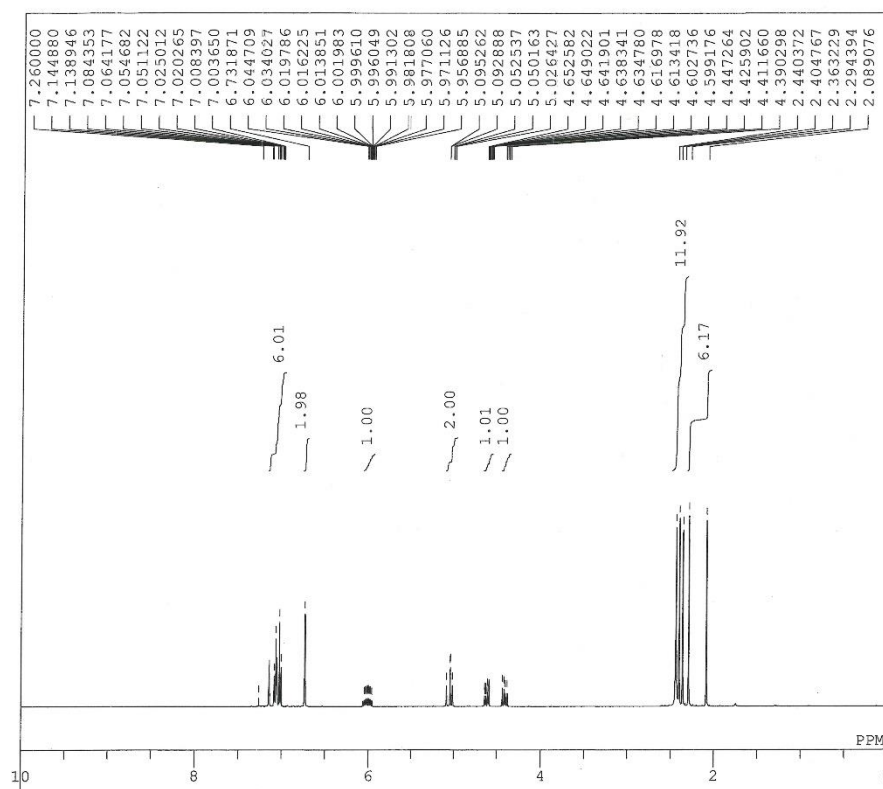

DFILE TT020 20210922-1.als  
 COMNT Qn-BOC 1H  
 DATIM 2021-09-22 17:22:21  
 OBNUC 1H  
 EXMOD single pulse.ex2  
 OBFRQ 399.78 MHz  
 OBSET 4.62 KHz  
 OBFIN 5.98 Hz  
 POINT 13107  
 FREQU 6218.81 Hz  
 SCANS 32  
 ACQTM 2.1076 sec  
 PD 5.0000 sec  
 PW1 5.17 usec  
 IRNUC 1H  
 CTEMP 20.4 c  
 SLVNT CDCL3  
 EXREF 7.26 ppm  
 BF 0.12 Hz  
 RGAIN 30

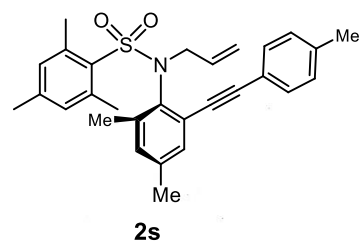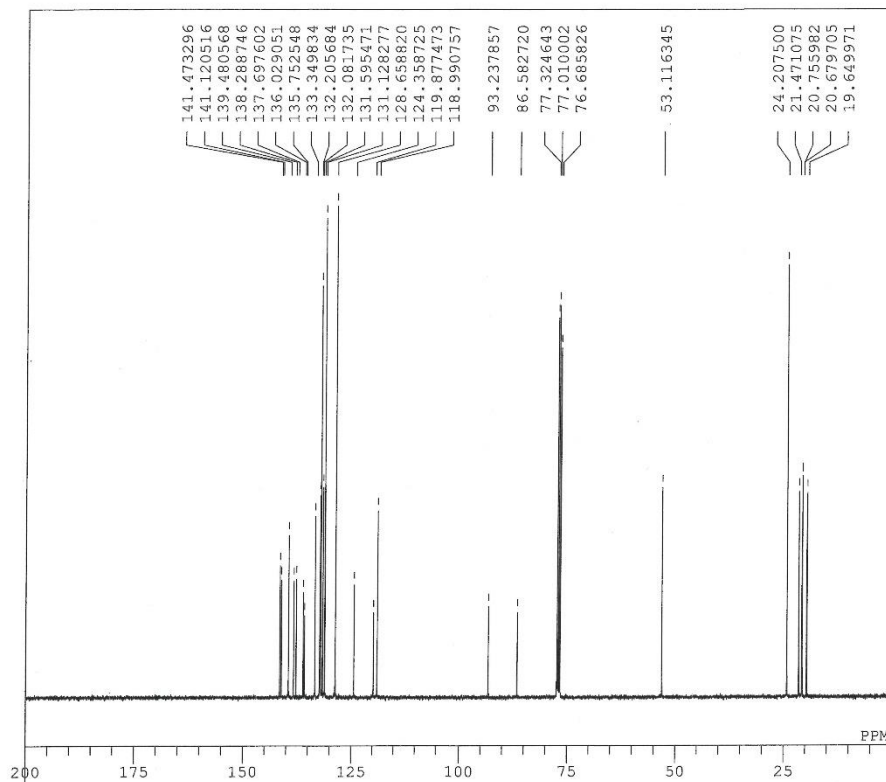

DFILE TT020 13C 20211217-1.als  
 COMNT 2021-12-17 09:43:06  
 OBNUC 13C  
 EXMOD single pulse\_dec  
 OBFRQ 100.53 MHz  
 OBSET 5.35 KHz  
 OBFIN 5.86 Hz  
 POINT 32768  
 FREQU 31407.03 Hz  
 SCANS 1024  
 ACQTM 1.0433 sec  
 PD 2.0000 sec  
 PW1 3.23 usec  
 IRNUC 1H  
 CTEMP 18.0 c  
 SLVNT CDCL3  
 EXREF 77.01 ppm  
 BF 1.20 Hz  
 RGAIN 60

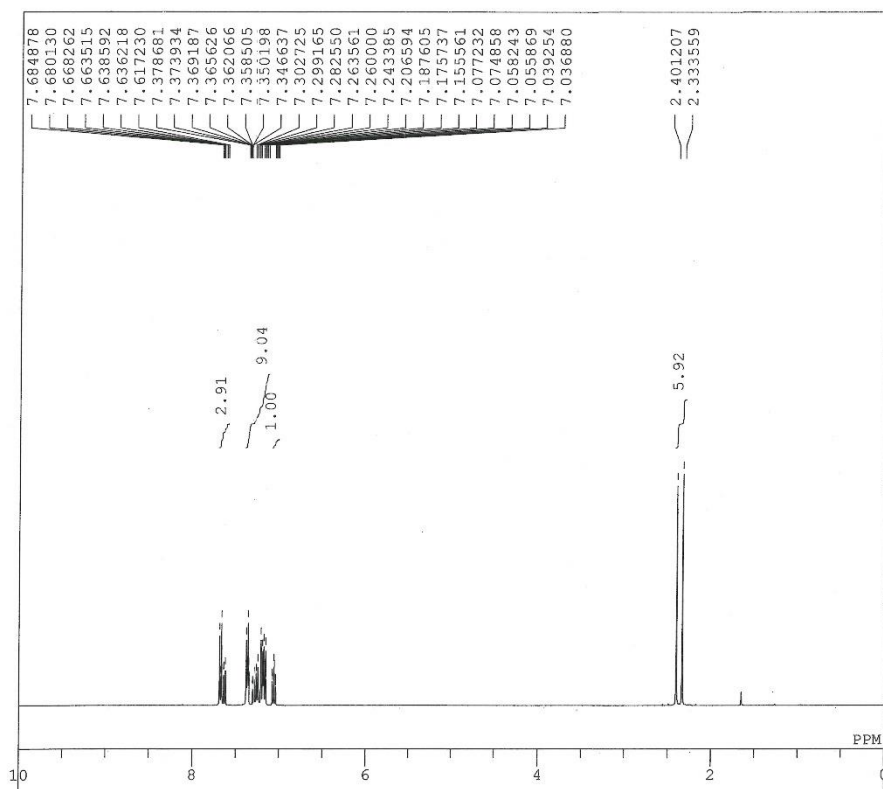

DFILE Y0024-2 20211209-1.als  
COMNT Qn-BOC 1H  
DATIM 2021-12-09 15:50:05  
OBNUC 1H  
EXMOD single\_pulse.ex2  
OBFRQ 399.78 MHz  
OBSET 4.62 KHz  
OBFIN 5.98 Hz  
POINT 16384  
FREQU 7773.63 Hz  
SCANS 32  
ACQTM 2.1076 sec  
PD 5.0000 sec  
PW1 5.80 usec  
IRNUC 1H  
CTEMP 18.8 c  
SLVNT CDCL3  
EXREF 7.26 ppm  
BF 0.12 Hz  
RGAIN 30

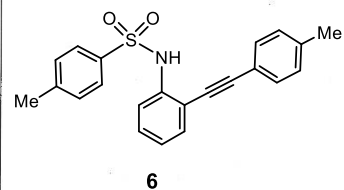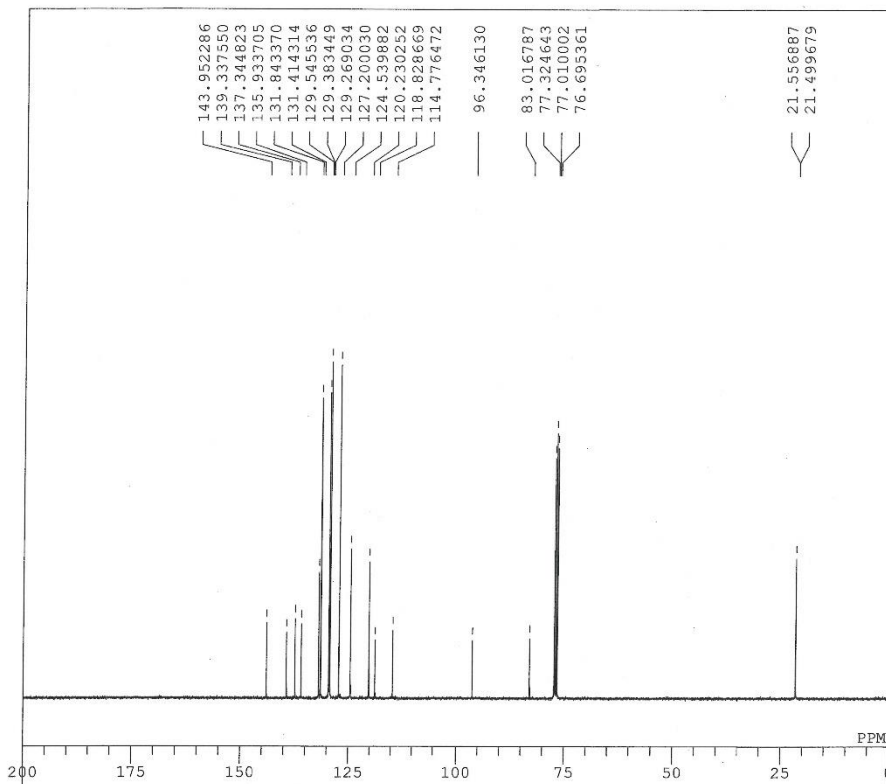

DFILE Y0024-13C 20211209-1.jdf  
COMNT  
DATIM 2021-12-09 18:15:52  
OBNUC 13C  
EXMOD single\_pulse\_dec  
OBFRQ 100.53 MHz  
OBSET 5.35 KHz  
OBFIN 5.86 Hz  
POINT 32768  
FREQU 31407.03 Hz  
SCANS 1024  
ACQTM 1.0433 sec  
PD 2.0000 sec  
PW1 3.23 usec  
IRNUC 1H  
CTEMP 18.7 c  
SLVNT CDCL3  
EXREF 77.01 ppm  
BF 1.20 Hz  
RGAIN 60

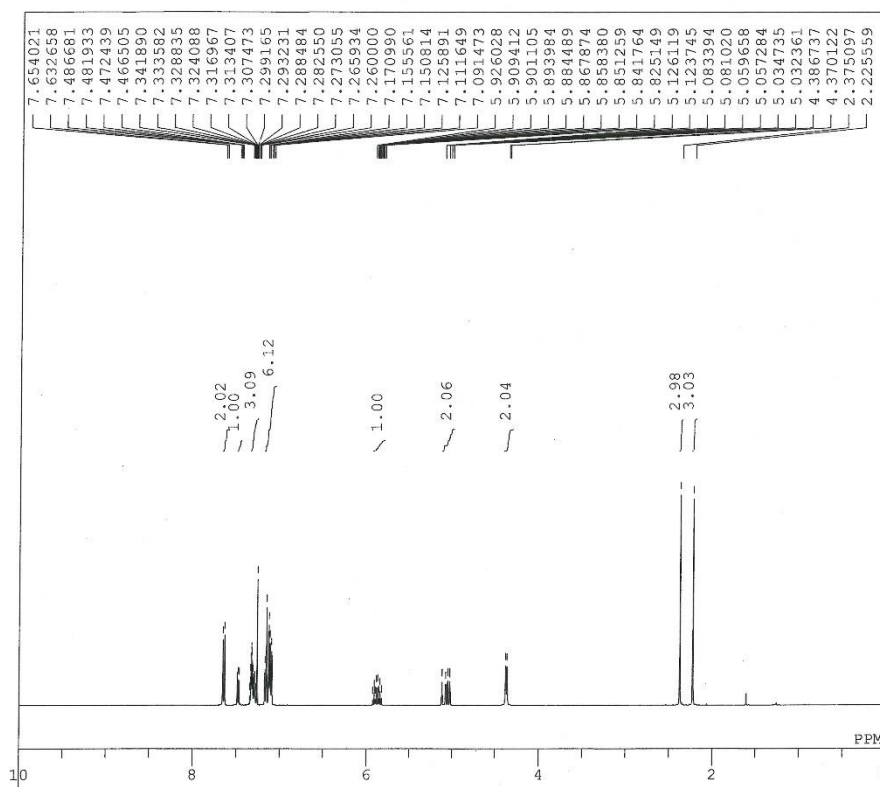

DFILE Y0027 acetone removal 20  
 COMNT Qn-BOC 1H  
 DATIM 2021-12-15 14:44:50  
 OBNUC 1H  
 EXMOD single pulse.ex2  
 OBFRQ 399.78 MHz  
 OBSET 4.62 KHz  
 OBFIN 5.98 Hz  
 POINT 16384  
 FREQU 7773.63 Hz  
 SCANS 32  
 ACQTM 2.1076 sec  
 PD 5.0000 sec  
 PW1 5.80 usec  
 IRNUC 1H  
 CTEMP 17.6 c  
 SLVNT CDCL3  
 EXREF 7.26 ppm  
 BF 0.12 Hz  
 RGAIN 30

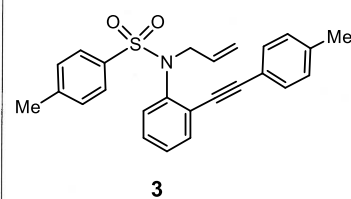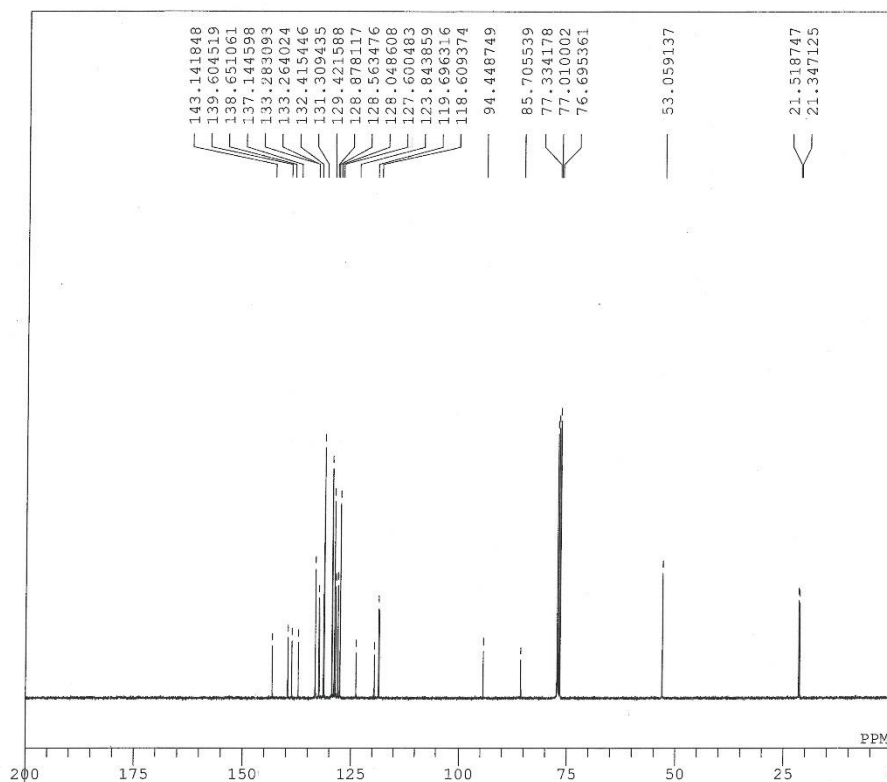

DFILE Y0027 13C 20211215-1.als  
 COMNT 2021-12-15 17:57:60  
 OBNUC 13C  
 EXMOD single pulse\_dec  
 OBFRQ 100.53 MHz  
 OBSET 5.35 KHz  
 OBFIN 5.86 Hz  
 POINT 32768  
 FREQU 31407.03 Hz  
 SCANS 1024  
 ACQTM 1.0433 sec  
 PD 2.0000 sec  
 PW1 3.23 usec  
 IRNUC 1H  
 CTEMP 18.9 c  
 SLVNT CDCL3  
 EXREF 77.01 ppm  
 BF 1.20 Hz  
 RGAIN 60

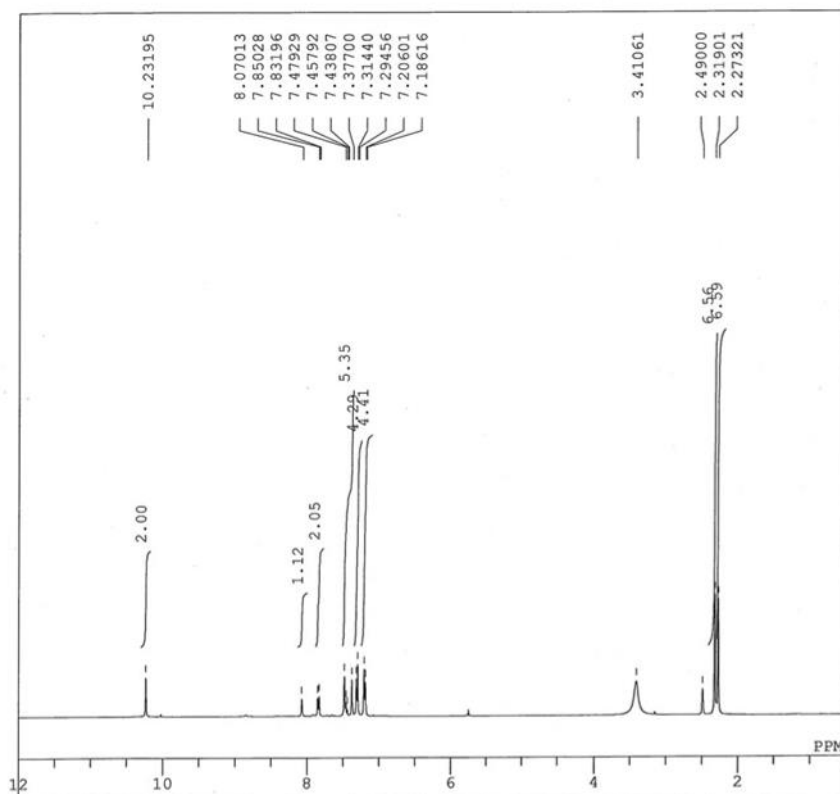

DFILE Y0013 20201215 DMSO 2-1.a)  
 COMNT Qn-BOC 1H  
 DATIM 2020-12-15 10:49:15  
 OBNUC 1H  
 EXMOD single pulse.ex2  
 OBFRQ 399.78 MHz  
 OBSET 5.19 KHz  
 OBFIN 6.74 Hz  
 POINT 13107  
 FREQU 7999.88 Hz  
 SCANS 32  
 ACQTM 1.6384 sec  
 PD 5.0000 sec  
 PW1 5.17 usec  
 IRNUC 1H  
 CTEMP 17.1 c  
 SLVNT DMSO  
 EXREF 2.49 ppm  
 BF 0.12 Hz  
 RGAIN 36

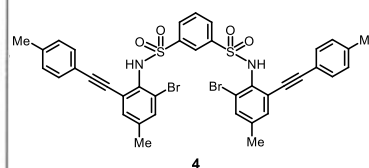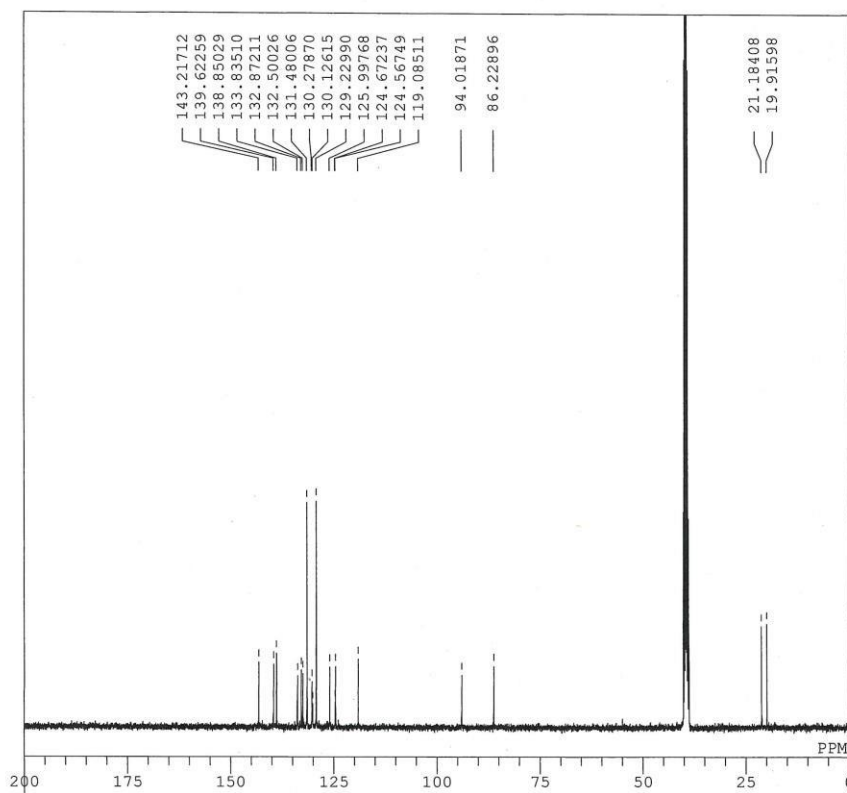

DFILE Y0013 20201216 DMSO 13C-1.  
 COMNT  
 DATIM 2020-12-16 12:58:59  
 OBNUC 13C  
 EXMOD single pulse\_dec  
 OBFRQ 100.53 MHz  
 OBSET 5.35 KHz  
 OBFIN 5.86 Hz  
 POINT 26214  
 FREQU 25125.24 Hz  
 SCANS 1024  
 ACQTM 1.0433 sec  
 PD 2.0000 sec  
 PW1 2.87 usec  
 IRNUC 1H  
 CTEMP 16.4 c  
 SLVNT DMSO  
 EXREF 39.50 ppm  
 BF 1.20 Hz  
 RGAIN 60



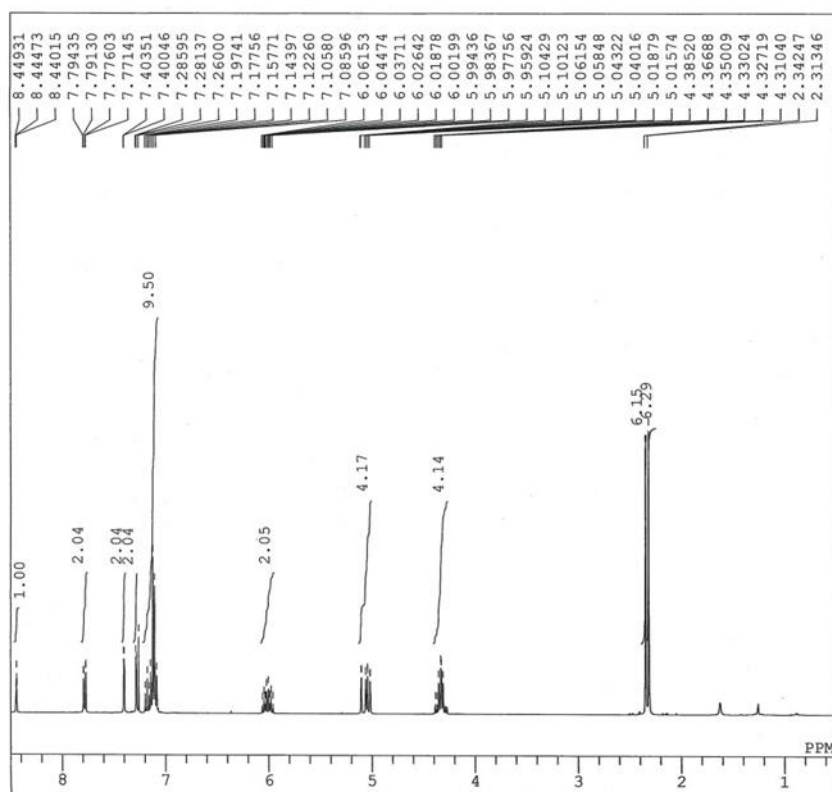

DFILE CN125 jyunnchiral 20201124  
 COMNT Qn-BOC 1H  
 DATIM 2020-11-24 13:26:23  
 OBNUC 1H  
 EXMOD single\_pulse.ex2  
 OBFRQ 399.78 MHz  
 OBSET 5.19 KHz  
 OBFIN 6.74 Hz  
 POINT 13107  
 FREQU 7999.88 Hz  
 SCANS 32  
 ACQTM 1.6384 sec  
 PD 5.0000 sec  
 PW1 5.17 usec  
 IRNUC 1H  
 CTEMP 16.1 c  
 SLVNT CDCL3  
 EXREF 7.26 ppm  
 BF 0.12 Hz  
 RGAIN 30

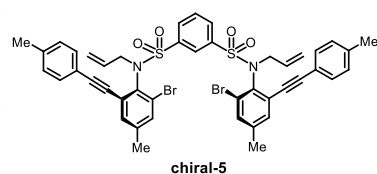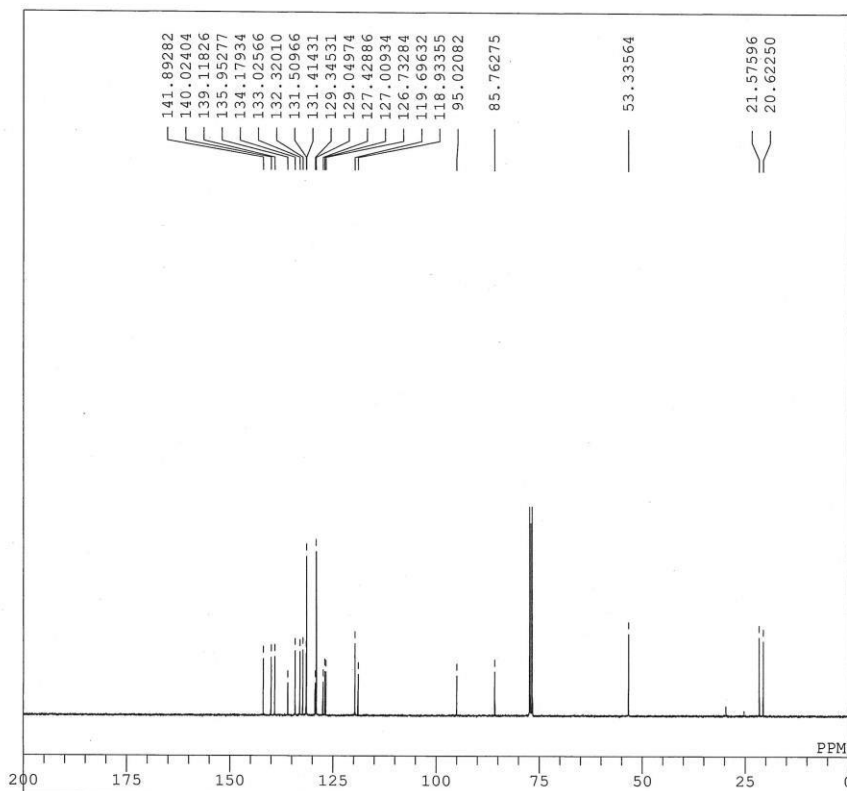

DFILE CN122 mplc 1st rac 13c 20  
 COMNT  
 DATIM 2020-09-29 13:42:03  
 OBNUC 13C  
 EXMOD single\_pulse\_dec  
 OBFRQ 100.53 MHz  
 OBSET 5.35 KHz  
 OBFIN 5.86 Hz  
 POINT 26214  
 FREQU 25125.24 Hz  
 SCANS 1024  
 ACQTM 1.0433 sec  
 PD 2.0000 sec  
 PW1 2.87 usec  
 IRNUC 1H  
 CTEMP 15.9 c  
 SLVNT CDCL3  
 EXREF 77.01 ppm  
 BF 1.20 Hz  
 RGAIN 60



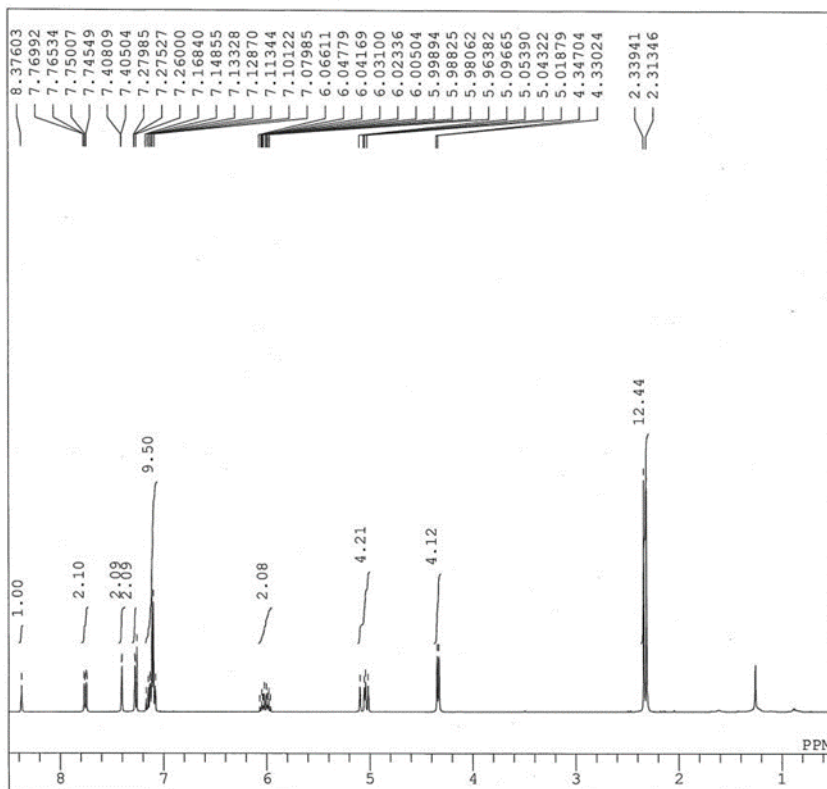

DFILE CN122 2nd 20201222-1.jdf  
 COMNT Qn-BOC 1H  
 DATIM 2020-12-22 13:48:33  
 OBNUC 1H  
 EXMOD single\_pulse.ex2  
 OBFRQ 399.78 MHz  
 OBSET 5.19 KHz  
 OBFIN 6.74 Hz  
 POINT 16384  
 FREQU 10000.00 Hz  
 SCANS 32  
 ACQTM 1.6384 sec  
 PD 5.0000 sec  
 PW1 5.17 usec  
 IRNUC 1H  
 CTEMP 15.8 c  
 SLVNT CDCL3  
 EXREF 7.26 ppm  
 BF 0.12 Hz  
 RGAIN 30

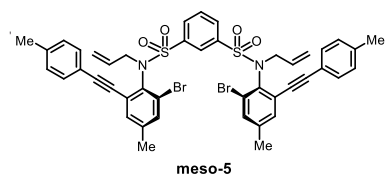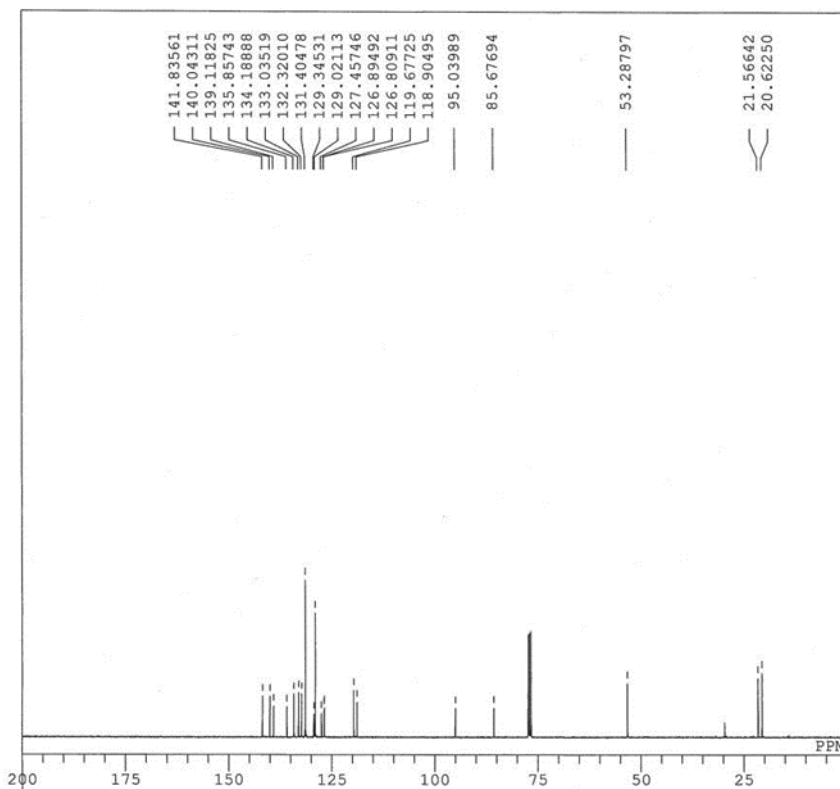

DFILE CN122 2nd 13c 20201222-1.a  
 COMNT  
 DATIM 2020-12-22 14:48:04  
 OBNUC 13C  
 EXMOD single\_pulse\_dec  
 OBFRQ 100.53 MHz  
 OBSET 5.35 KHz  
 OBFIN 5.86 Hz  
 POINT 26214  
 FREQU 25125.24 Hz  
 SCANS 1024  
 ACQTM 1.0433 sec  
 PD 2.0000 sec  
 PW1 2.87 usec  
 IRNUC 1H  
 CTEMP 16.8 c  
 SLVNT CDCL3  
 EXREF 77.01 ppm  
 BF 1.20 Hz  
 RGAIN 60

## HPLC analysis using a chiral column for the determination of the ee

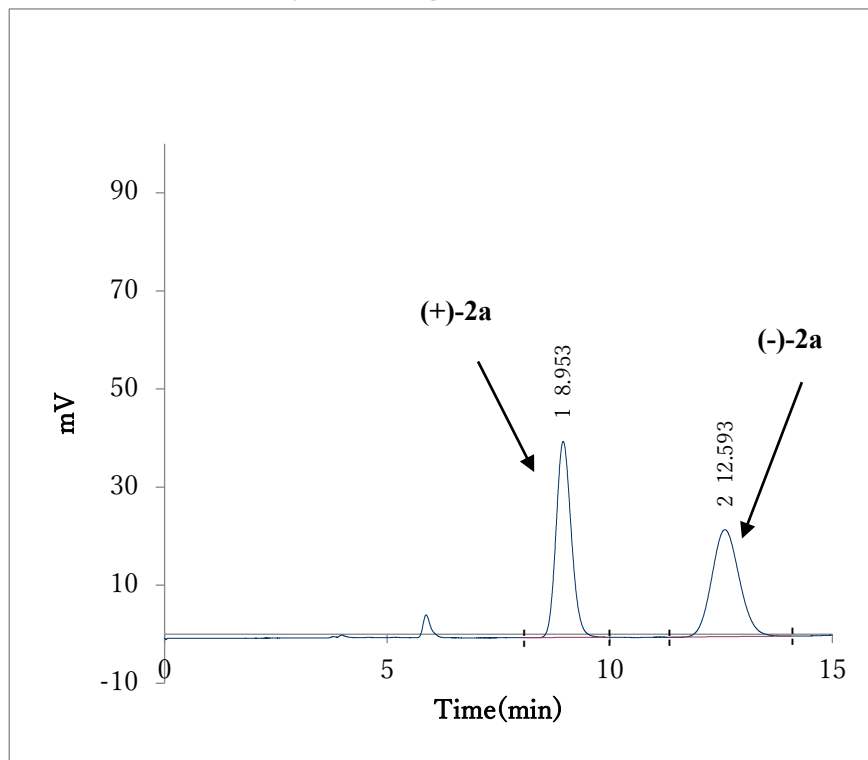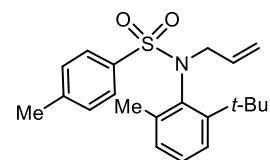

**rac-2a**

AS-H  
eluent : 15% IPA in hexane  
flow rate : 0.800 ml/min

| No. | Rt     | Area     | Area(%) | Height |
|-----|--------|----------|---------|--------|
| 1   | 8.953  | 946346.6 | 50.3    | 39991  |
| 2   | 12.593 | 934059.8 | 49.7    | 21825  |
|     |        | 1880406  | 100     | 61816  |

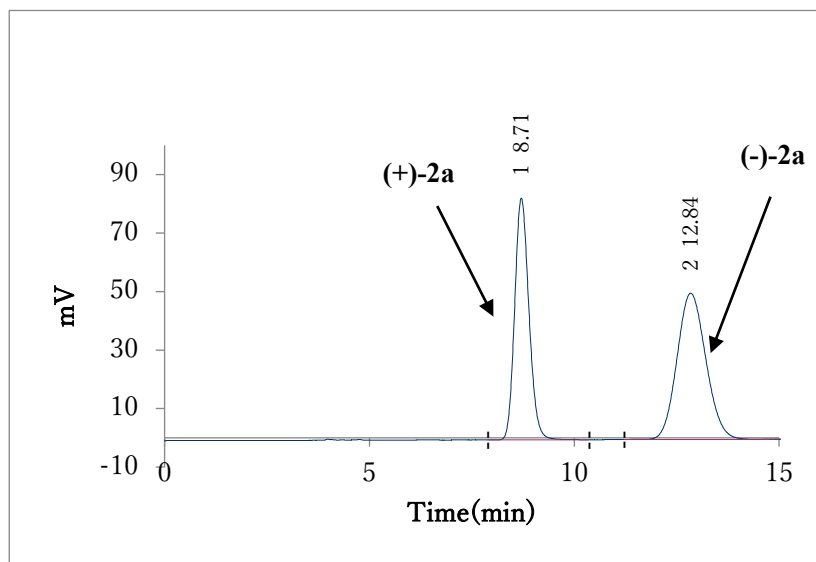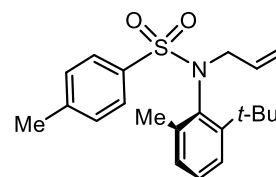

**2a**

AS-H  
eluent : 15% IPA in hexane  
flow rate : 0.800 ml/min

| No. | Rt    | Area    | Area(%) | Height |
|-----|-------|---------|---------|--------|
| 1   | 8.71  | 1998473 | 45      | 82653  |
| 2   | 12.84 | 2447382 | 55      | 50024  |
|     |       | 4445855 | 100     | 132677 |

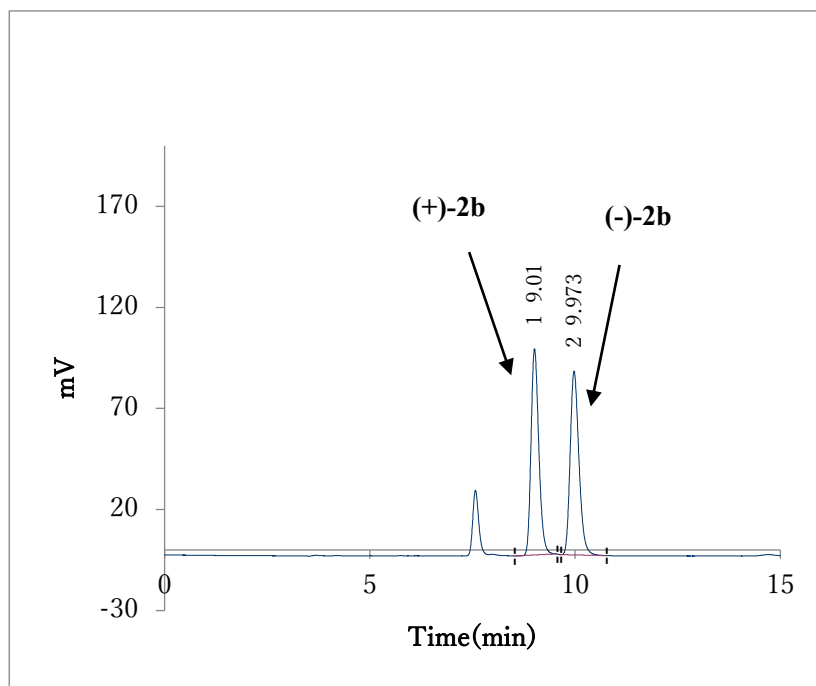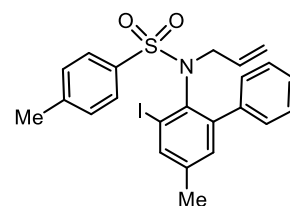

**rac-2b**

OD-3  
eluent : 15% IPA in hexane  
flow rate : 0.800 ml/min

| No. | Rt    | Area    | Area(%) | Height |
|-----|-------|---------|---------|--------|
| 1   | 9.01  | 1335462 | 49.8    | 102013 |
| 2   | 9.973 | 1348567 | 50.2    | 90983  |
|     |       | 2684030 | 100     | 192996 |

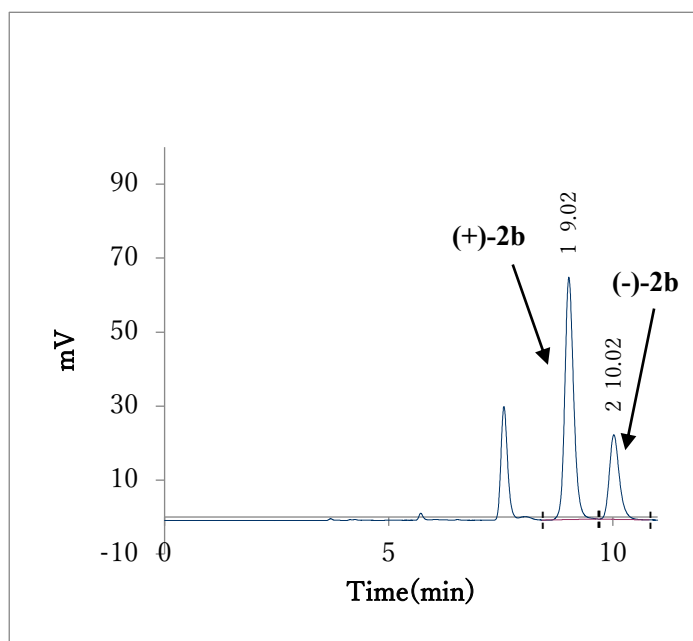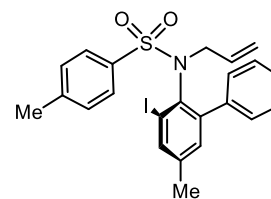

**2b**

OD-3  
eluent : 15% IPA in hexane  
flow rate : 0.800 ml/min

| No. | Rt    | Area     | Area(%) | Height |
|-----|-------|----------|---------|--------|
| 1   | 9.02  | 897741.6 | 71.7    | 65538  |
| 2   | 10.02 | 353680.6 | 28.3    | 22887  |
|     |       | 1251422  | 100     | 88425  |

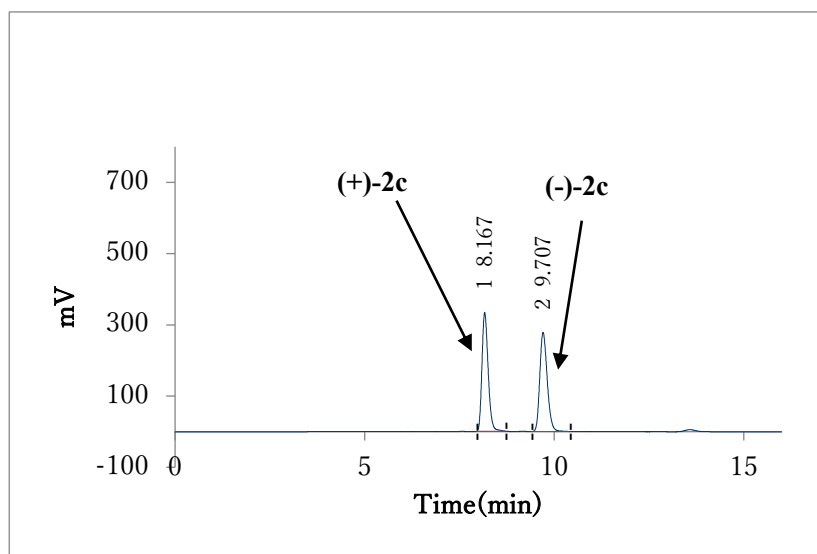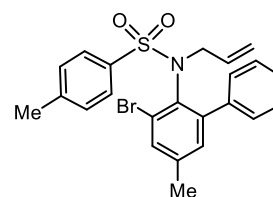

**rac-2c**

OD-3  
eluent : 15% IPA in hexane  
flow rate : 0.800 ml/min

| No. | Rt    | Area    | Area(%) | Height |
|-----|-------|---------|---------|--------|
| 1   | 8.167 | 3774489 | 49.9    | 334226 |
| 2   | 9.707 | 3784213 | 50.1    | 278629 |
|     |       | 7558702 | 100     |        |

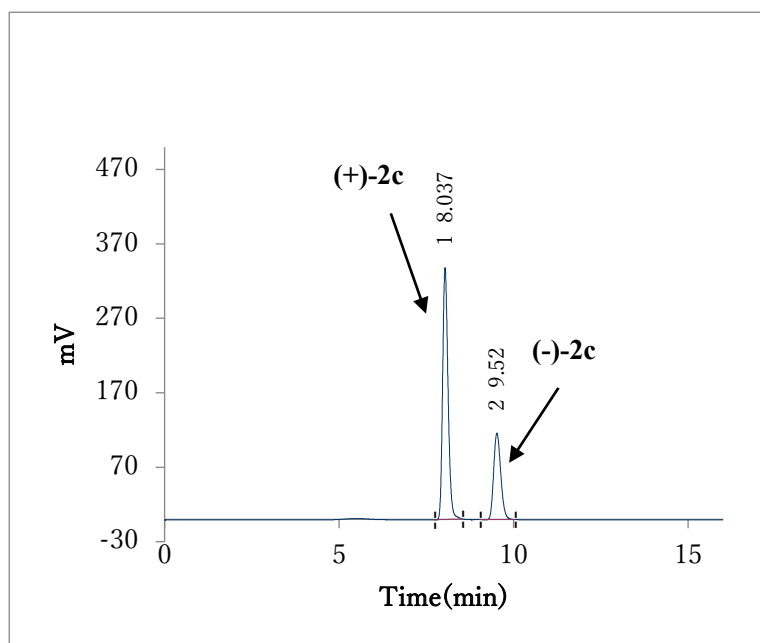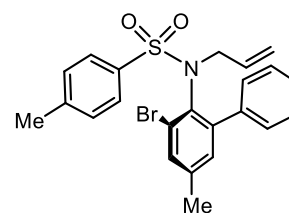

**2c**

OD-3  
eluent : 15% IPA in hexane  
flow rate : 0.800 ml/min

| No. | Rt    | Area    | Area(%) | Height |
|-----|-------|---------|---------|--------|
| 1   | 8.037 | 3637341 | 69      | 337996 |
| 2   | 9.52  | 1631538 | 31      | 116315 |
|     |       | 5268879 | 100     | 454311 |

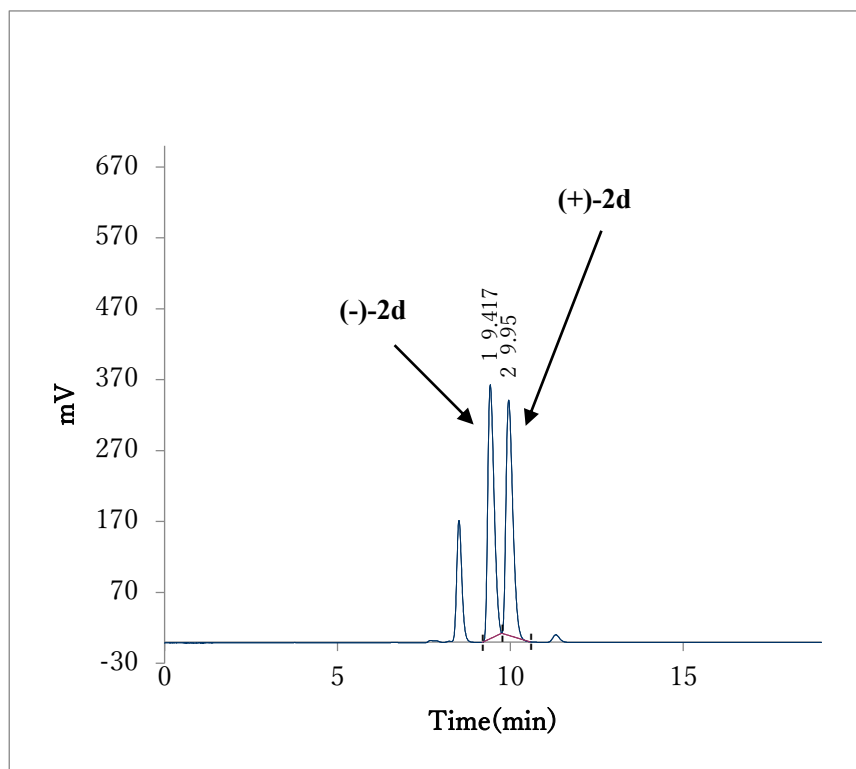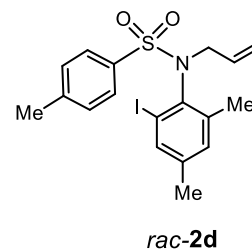

OD-3  
eluent : 3% IPA in hexane  
flow rate : 0.800 ml/min

| No. | Rt    | Area    | Area(%) | Height |
|-----|-------|---------|---------|--------|
| 1   | 9.417 | 4555926 | 50.1    | 358224 |
| 2   | 9.95  | 4543942 | 49.9    | 332272 |
|     |       | 9099868 | 100     | 690496 |

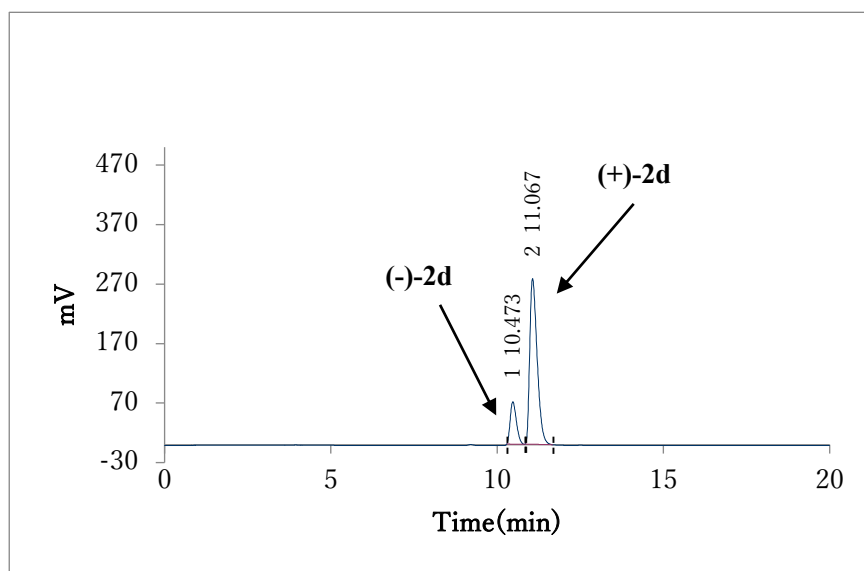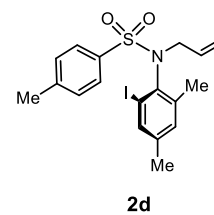

OD-3  
eluent : 3% IPA in hexane  
flow rate : 0.800 ml/min

| No. | Rt     | Area     | Area(%) | Height |
|-----|--------|----------|---------|--------|
| 1   | 10.473 | 917391.8 | 17.6    | 71148  |
| 2   | 11.067 | 4289202  | 82.4    | 278279 |
|     |        | 5206593  | 100     | 349427 |

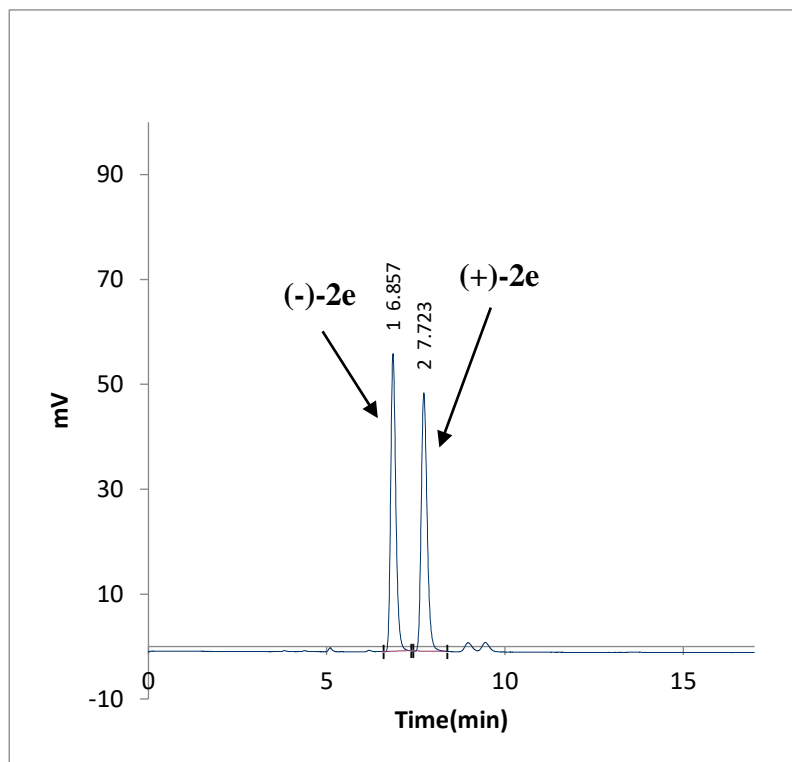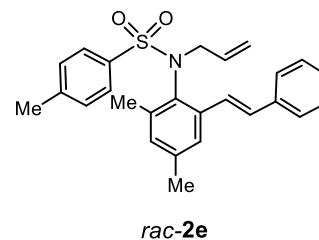

OD-3  
eluent : 15% IPA in hexane  
flow rate : 0.800 ml/min

| No. | Rt    | Area     | Area(%) | Height |
|-----|-------|----------|---------|--------|
| 1   | 6.857 | 566012   | 50.2    | 56774  |
| 2   | 7.723 | 562544.7 | 49.8    | 49290  |
|     |       | 1128557  | 100     | 106064 |

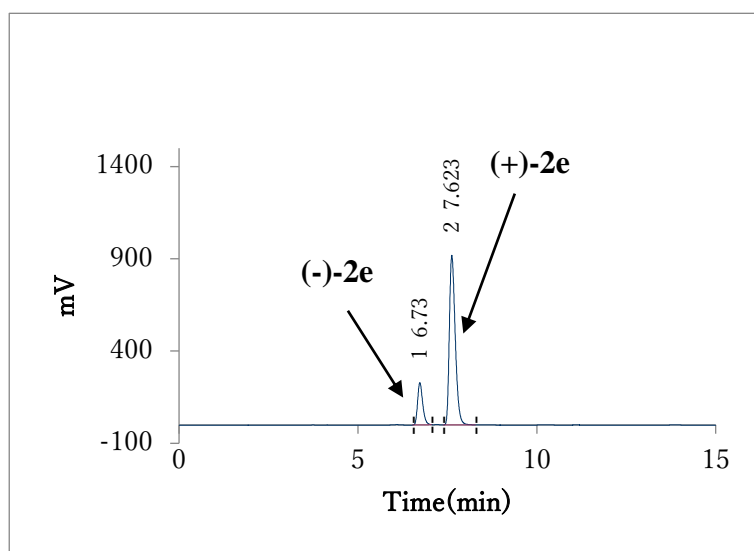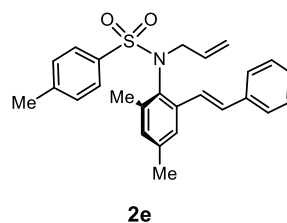

OD-3  
eluent : 15% IPA in hexane  
flow rate : 0.800 ml/min

| No. | Rt    | Area     | Area(%) | Height  |
|-----|-------|----------|---------|---------|
| 1   | 6.73  | 2245655  | 17.6    | 229431  |
| 2   | 7.623 | 10527822 | 82.4    | 919828  |
|     |       | 12773477 | 100     | 1149259 |



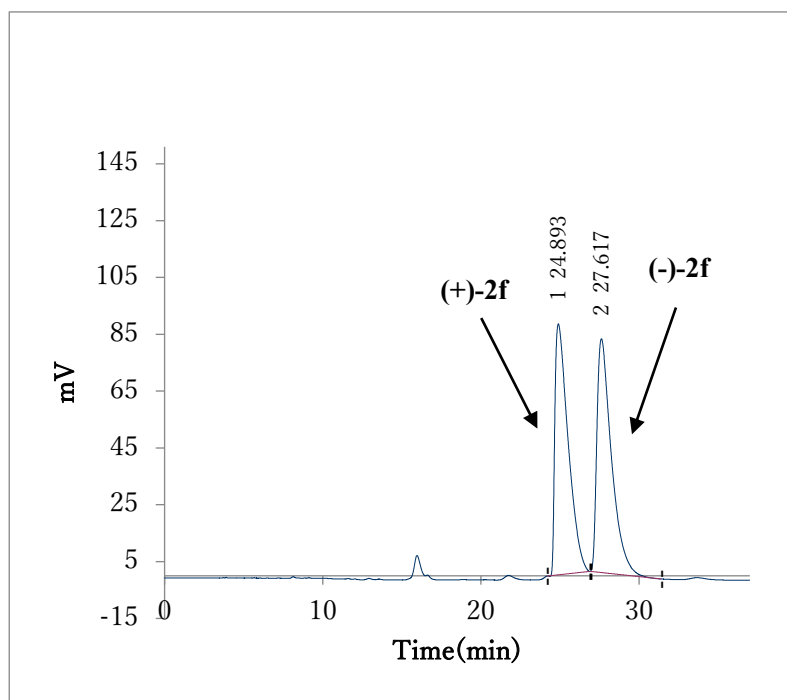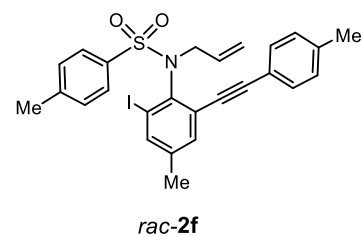

OD-3  
eluent : 3% IPA in hexane  
flow rate : 0.800 ml/min

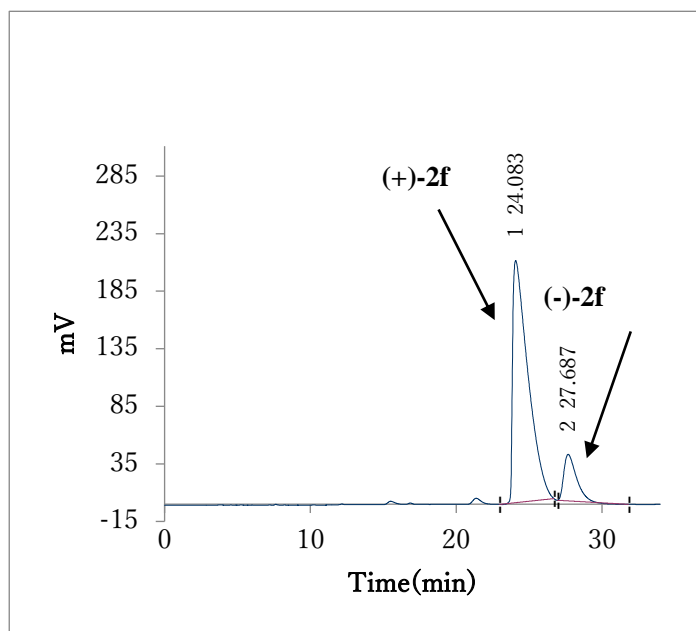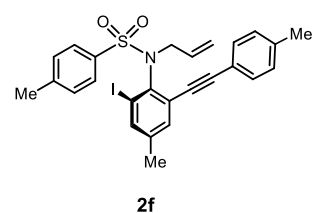

OD-3  
eluent : 3% IPA in hexane  
flow rate : 0.800 ml/min

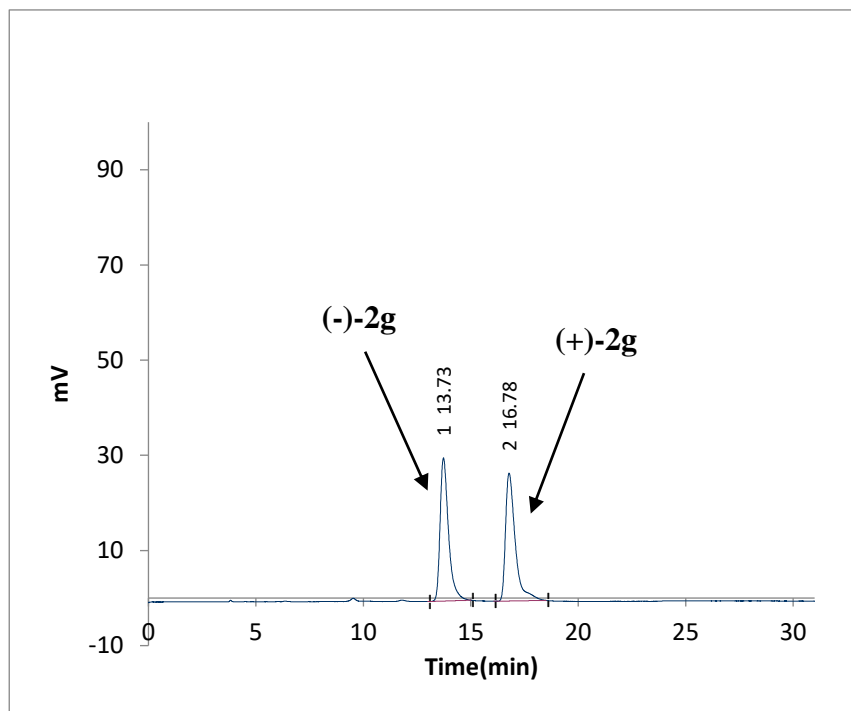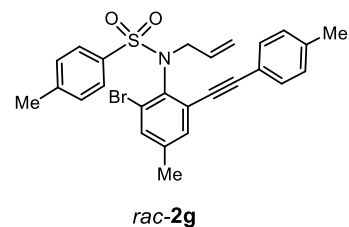

**rac-2g**  
 OD-3  
 eluent : 5% IPA in hexane  
 flow rate : 0.800 ml/min

| No. | Rt    | Area     | Area(%) | Height |
|-----|-------|----------|---------|--------|
| 1   | 13.73 | 818781.6 | 49.2    | 30108  |
| 2   | 16.78 | 846494.6 | 50.8    | 26893  |
|     |       | 1665276  | 100     | 57001  |

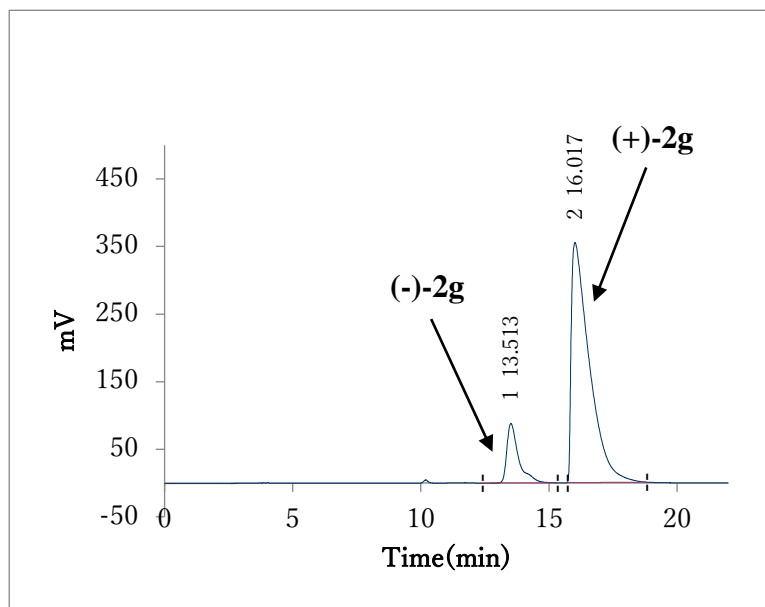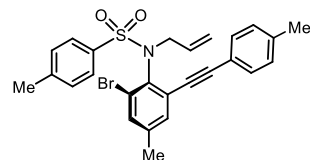

**2g**  
 OD-3  
 eluent : 5% IPA in hexane  
 flow rate : 0.800 ml/min

| No. | Rt     | Area     | Area(%) | Height |
|-----|--------|----------|---------|--------|
| 1   | 13.513 | 2792384  | 13.8    | 88046  |
| 2   | 16.017 | 17404710 | 86.2    | 355501 |
|     |        | 20197094 | 100     | 443547 |

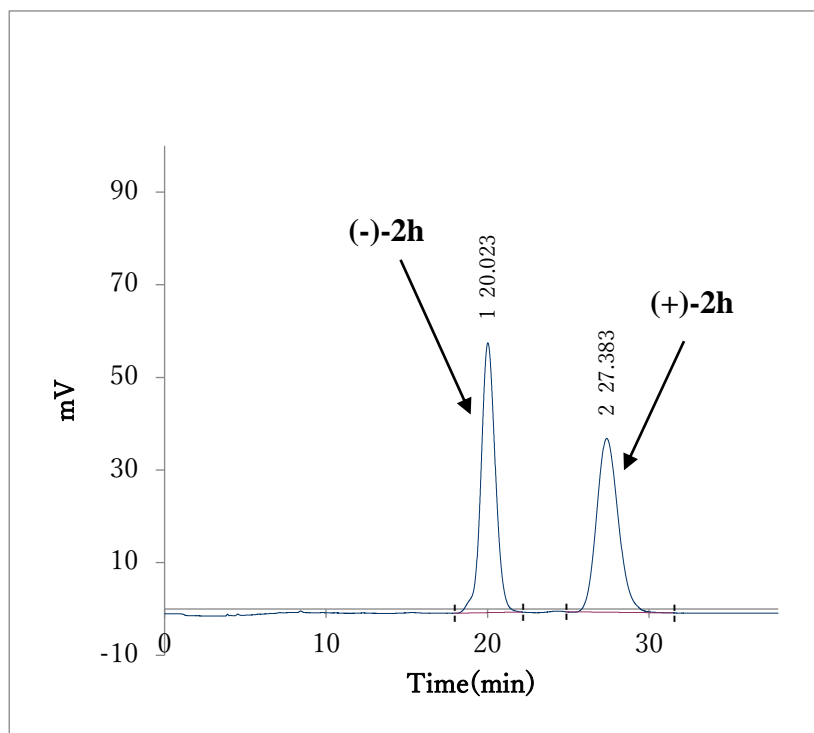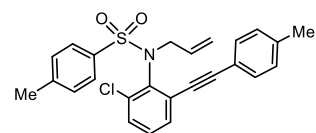

**rac-2h**

AS-H  
eluent : 15% IPA in hexane  
flow rate : 0.800 ml/min

| No. | Rt     | Area    | Area(%) | Height |
|-----|--------|---------|---------|--------|
| 1   | 20.023 | 3607239 | 50.8    | 58265  |
| 2   | 27.383 | 3498382 | 49.2    | 37534  |
|     |        | 7105622 | 100     | 95799  |

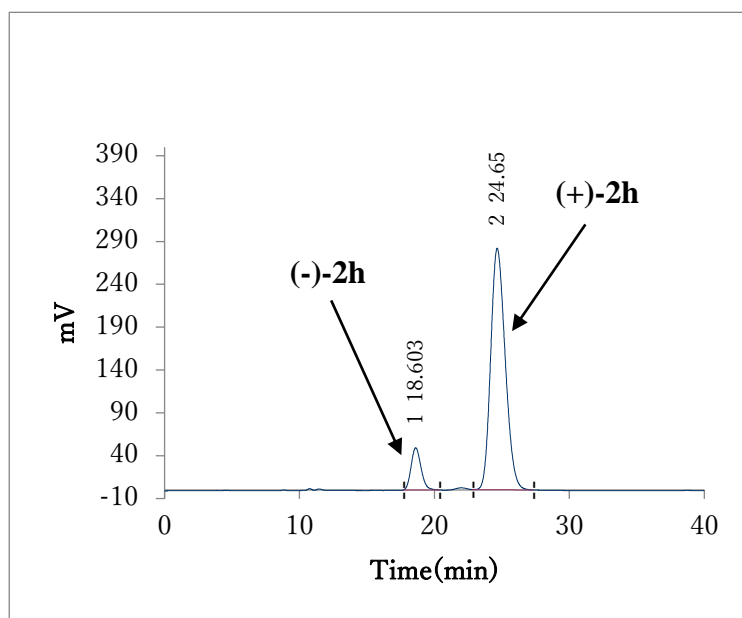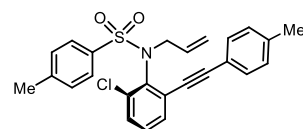

**2h**

AS-H  
eluent : 15% IPA in hexane  
flow rate : 0.800 ml/min

| No. | Rt     | Area     | Area(%) | Height |
|-----|--------|----------|---------|--------|
| 1   | 18.603 | 2516148  | 10.7    | 49327  |
| 2   | 24.65  | 21061843 | 89.3    | 281780 |
|     |        | 23577991 | 100     | 331107 |

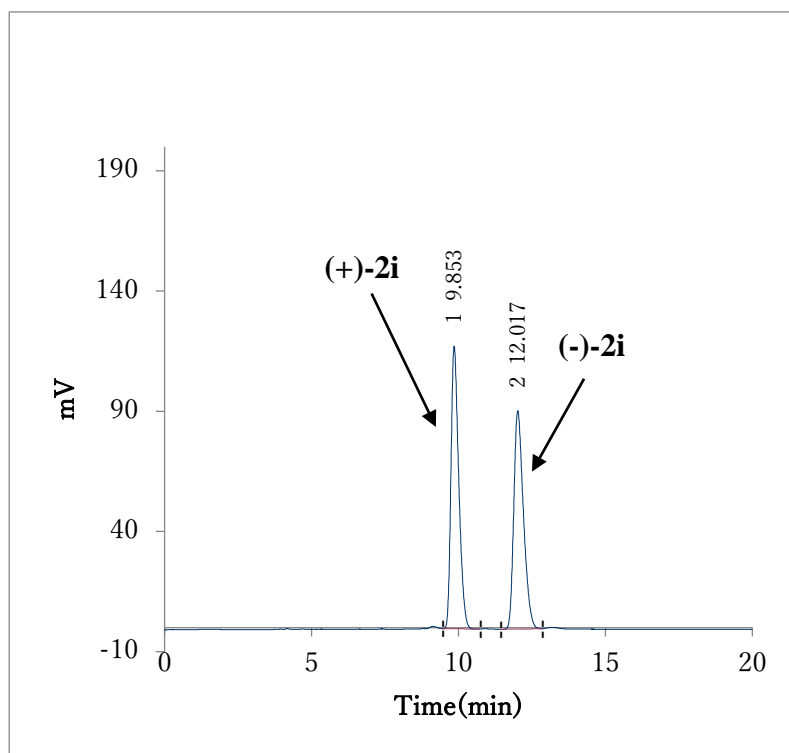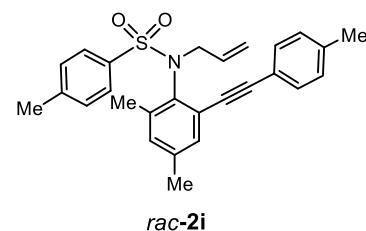

AD-H  
eluent : 15% IPA in hexane  
flow rate : 0.800 ml/min

| No. | Rt     | Area    | Area(%) | Height |
|-----|--------|---------|---------|--------|
| 1   | 9.853  | 2160478 | 51.1    | 117545 |
| 2   | 12.017 | 2070706 | 48.9    | 90830  |
|     |        | 4231184 | 100     | 208375 |

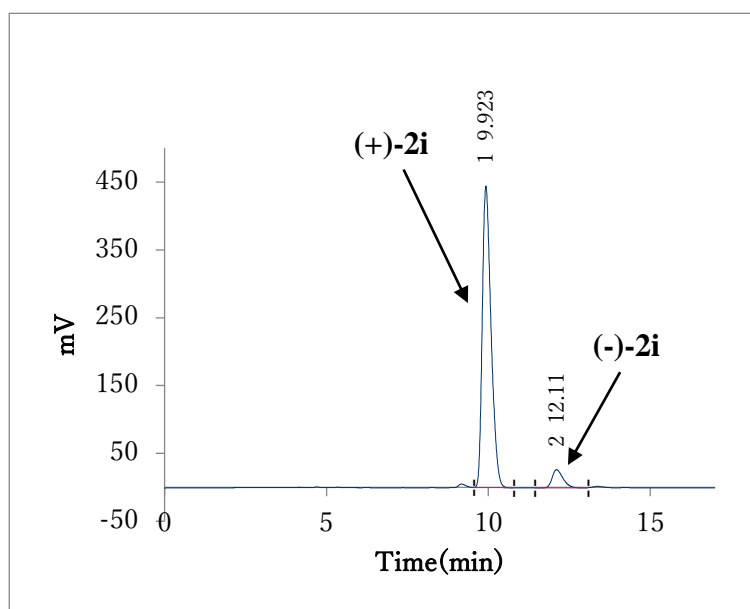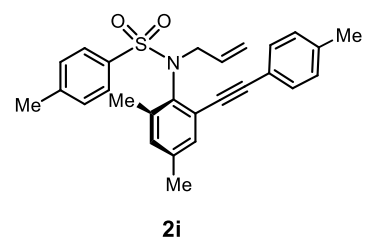

AD-H  
eluent : 15% IPA in hexane  
flow rate : 0.800 ml/min

| No. | Rt    | Area     | Area(%) | Height |
|-----|-------|----------|---------|--------|
| 1   | 9.923 | 8352218  | 93.1    | 444591 |
| 2   | 12.11 | 616146.6 | 6.9     | 26956  |
|     |       | 8968364  | 100     | 471547 |

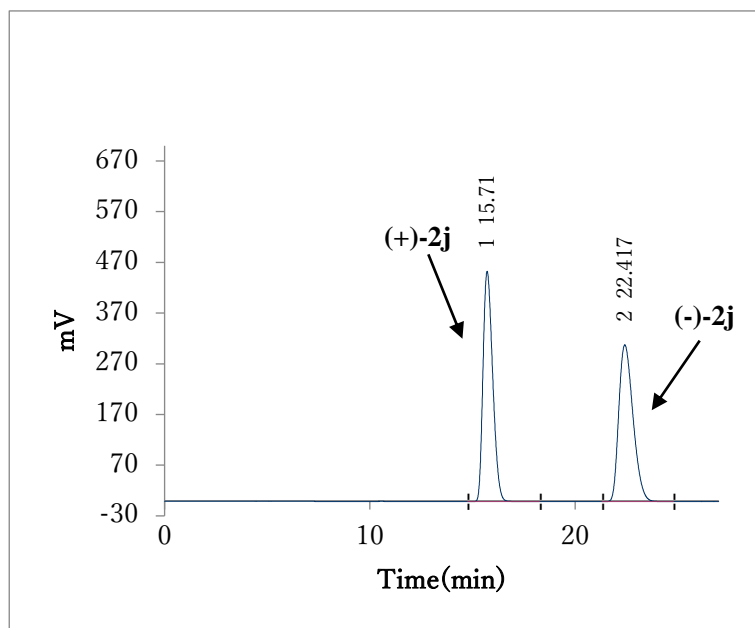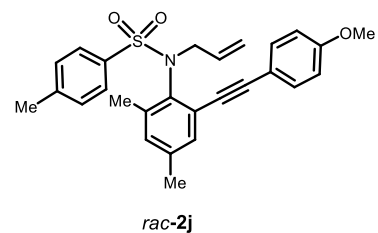

**rac-2j**  
AD-H  
eluent : 15% IPA in hexane  
flow rate : 0.800 ml/min

| No. | Rt     | Area     | Area(%) | Height |
|-----|--------|----------|---------|--------|
| 1   | 15.71  | 14871225 | 50      | 454163 |
| 2   | 22.417 | 14882932 | 50      | 309231 |
|     |        | 29754157 | 100     | 763394 |

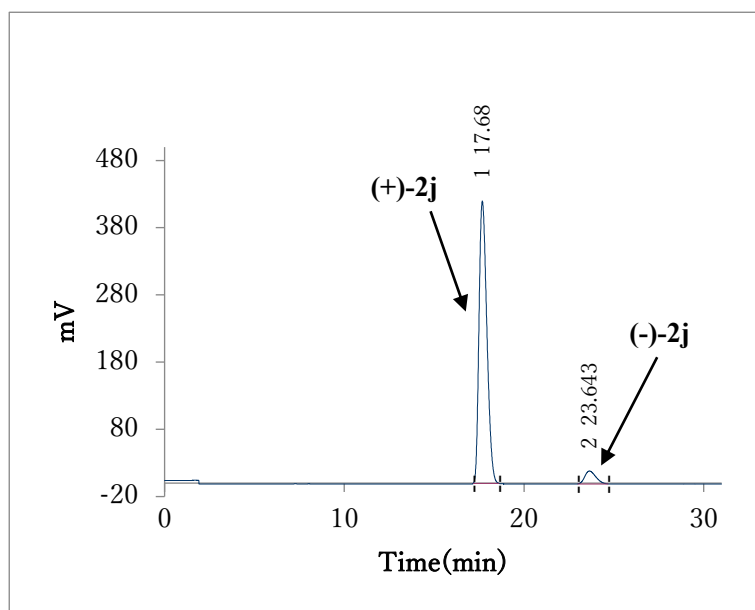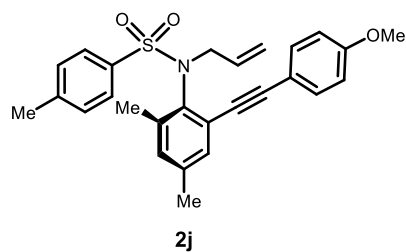

**2j**  
AD-H  
eluent : 15% IPA in hexane  
flow rate : 0.800 ml/min

| No. | Rt     | Area     | Area(%) | Height |
|-----|--------|----------|---------|--------|
| 1   | 17.68  | 12792973 | 94      | 420224 |
| 2   | 23.643 | 812021.8 | 6       | 19140  |
|     |        | 13604994 | 100     | 439364 |

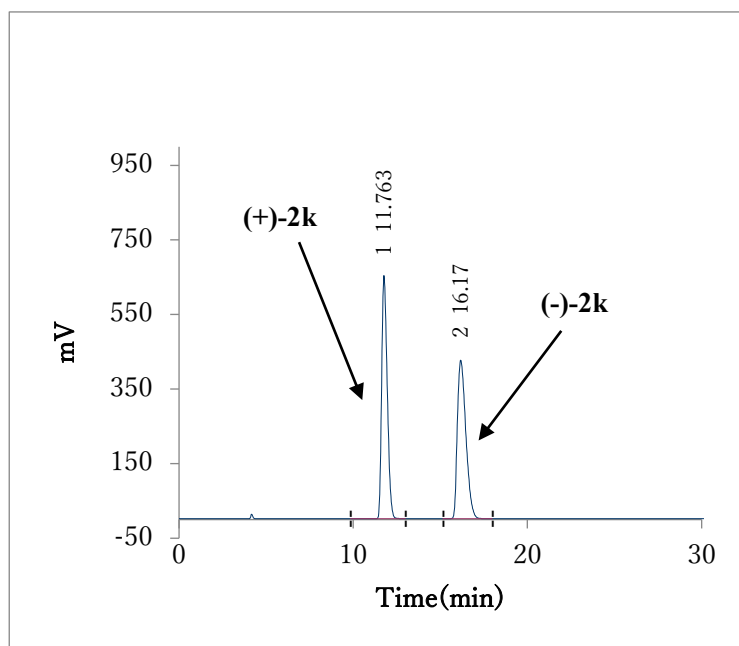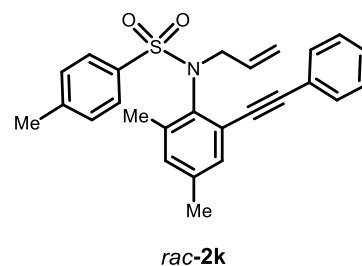

AD-H  
eluent : 15% IPA in hexane  
flow rate : 0.800 ml/min

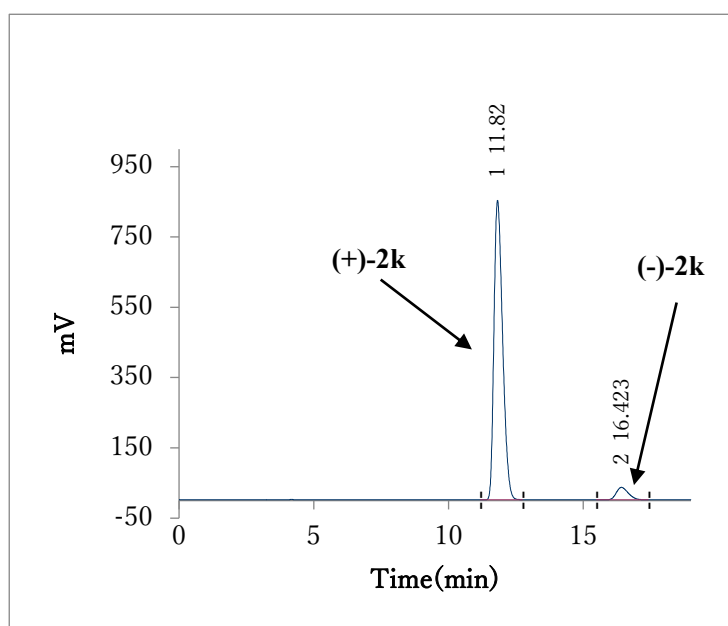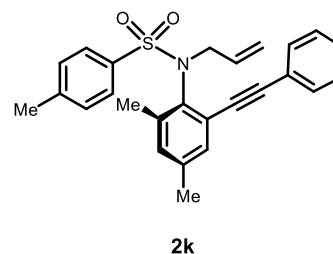

AD-H  
eluent : 15% IPA in hexane  
flow rate : 0.800 ml/min



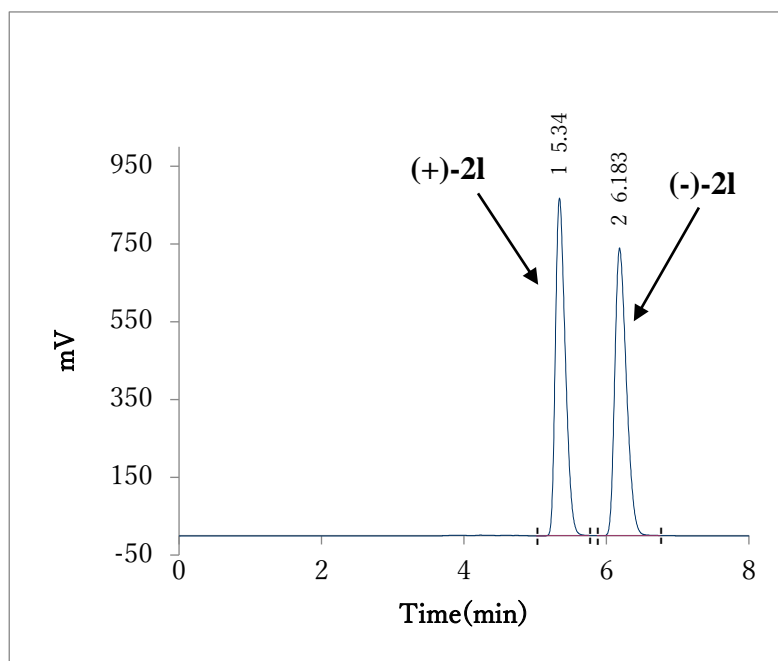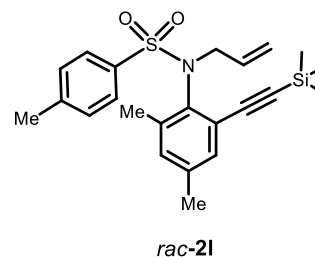

AD-H  
eluent : 15% IPA in hexane  
flow rate : 0.800 ml/min

| No. | Rt    | Area     | Area(%) | Height  |
|-----|-------|----------|---------|---------|
| 1   | 5.34  | 8351457  | 50      | 868501  |
| 2   | 6.183 | 8354624  | 50      | 739717  |
|     |       | 16706081 | 100     | 1608218 |

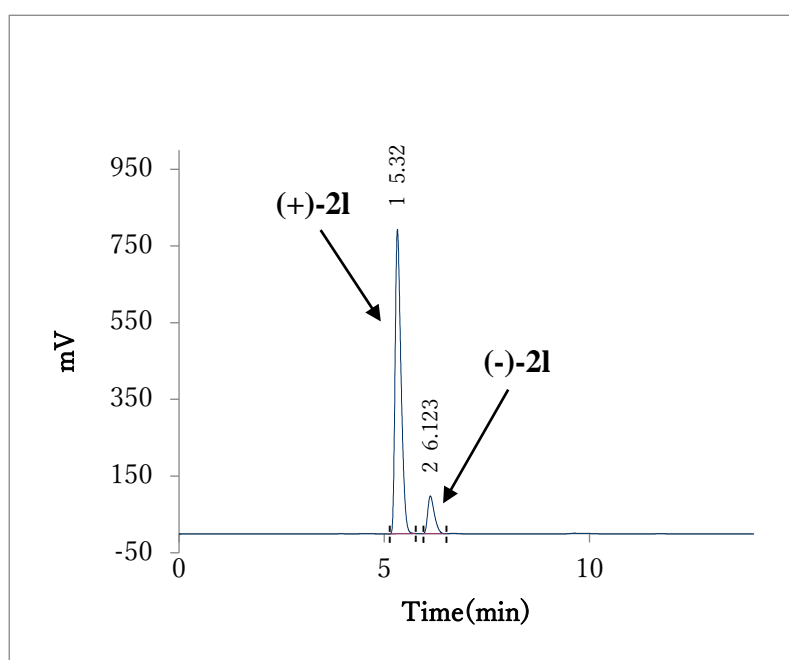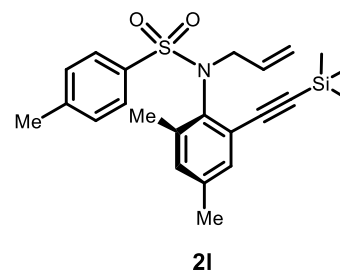

AD-H  
eluent : 15% IPA in hexane  
flow rate : 0.800 ml/min

| No. | Rt    | Area    | Area(%) | Height |
|-----|-------|---------|---------|--------|
| 1   | 5.32  | 7899865 | 87.6    | 793544 |
| 2   | 6.123 | 1116536 | 12.4    | 98740  |
|     |       | 9016401 | 100     | 892284 |

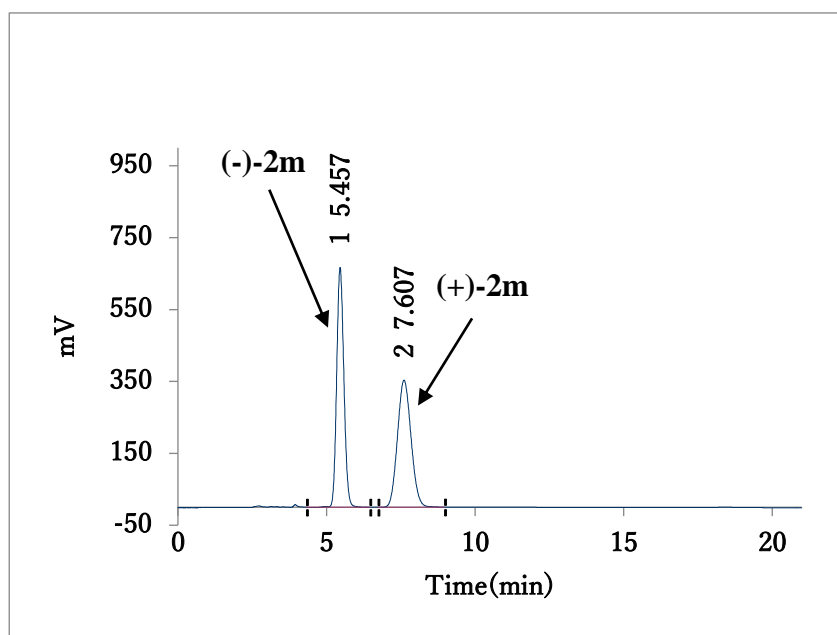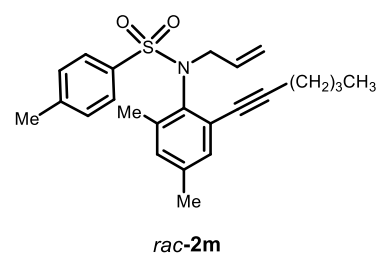

**rac-2m**

AS-H  
eluent : 15% IPA in hexane  
flow rate : 0.800 ml/min

| No. | Rt    | Area     | Area(%) | Height  |
|-----|-------|----------|---------|---------|
| 1   | 5.457 | 11207659 | 50      | 667207  |
| 2   | 7.607 | 11217198 | 50      | 353275  |
|     |       | 22424857 | 100     | 1020482 |

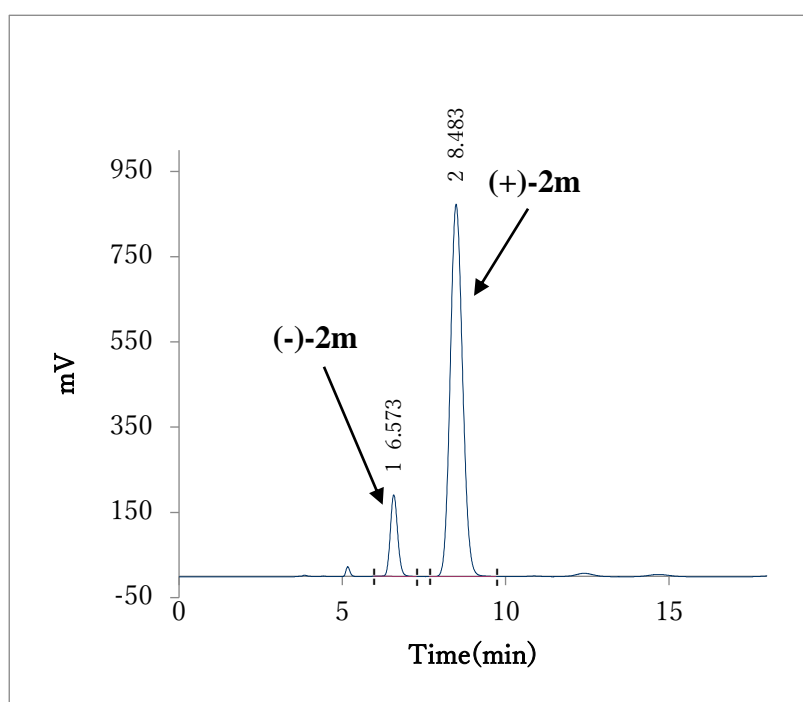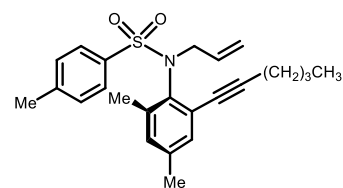

**2m**

AS-H  
eluent : 15% IPA in hexane  
flow rate : 0.800 ml/min

| No. | Rt    | Area     | Area(%) | Height  |
|-----|-------|----------|---------|---------|
| 1   | 6.573 | 2984160  | 11.5    | 191397  |
| 2   | 8.483 | 22926038 | 88.5    | 873678  |
|     |       | 25910198 | 100     | 1065075 |

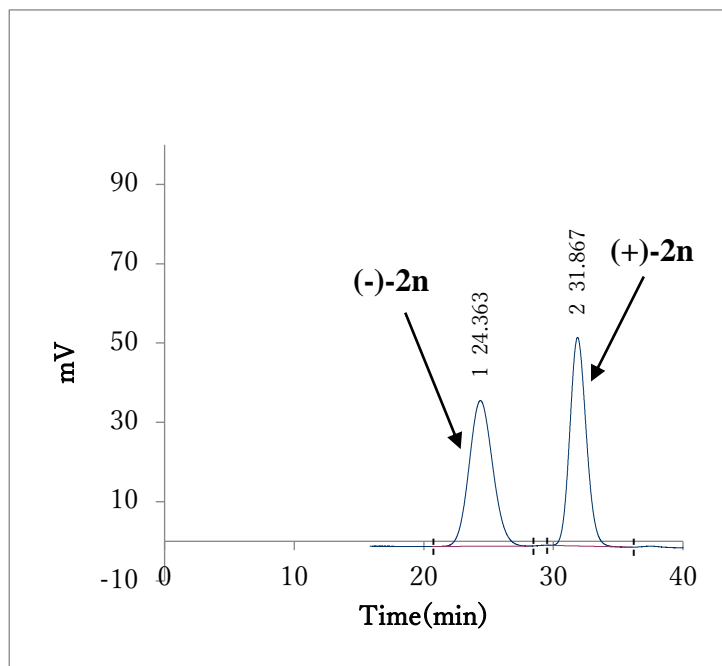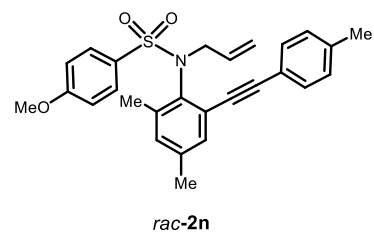

**rac-2n**  
AS-H  
eluent : 5% IPA in hexane  
flow rate : 0.800 ml/min

| No. | Rt     | Area    | Area(%) | Height |
|-----|--------|---------|---------|--------|
| 1   | 24.363 | 4648267 | 50.1    | 36764  |
| 2   | 31.867 | 4630188 | 49.9    | 52617  |
|     |        | 9278454 | 100     | 89381  |

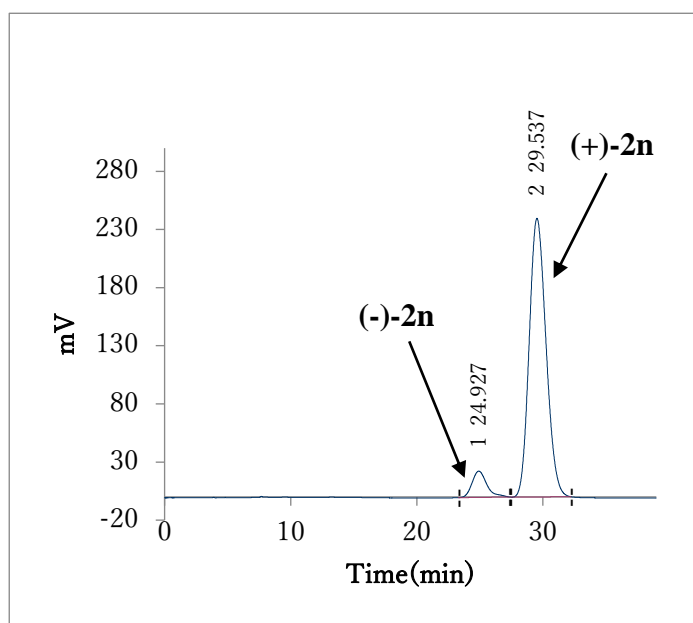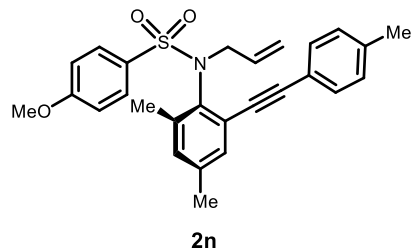

**2n**  
AS-H  
eluent : 5% IPA in hexane  
flow rate : 0.800 ml/min

| No. | Rt     | Area     | Area(%) | Height |
|-----|--------|----------|---------|--------|
| 1   | 24.927 | 1836889  | 7.6     | 22609  |
| 2   | 29.537 | 22208298 | 92.4    | 239673 |
|     |        | 24045187 | 100     | 262282 |

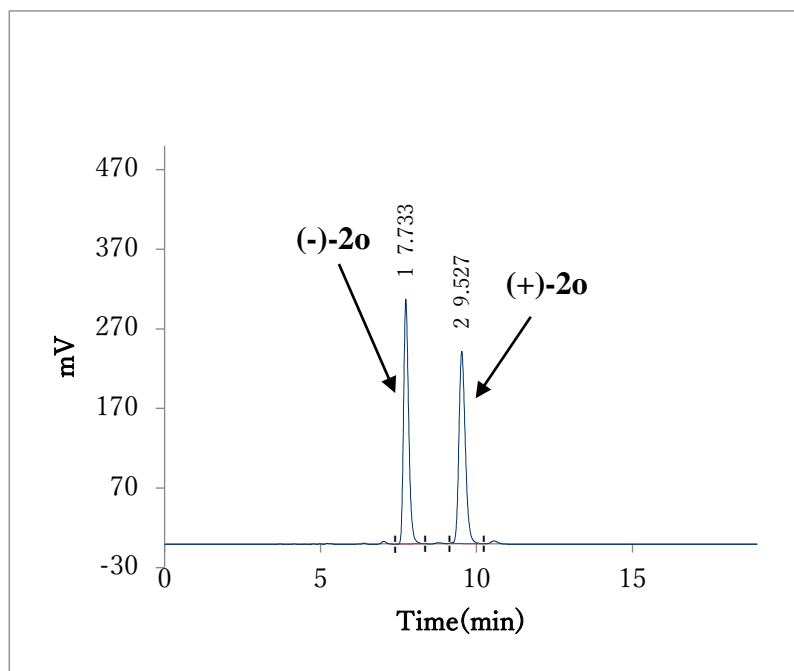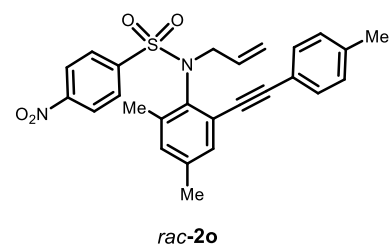

**rac-2o**  
 OD-3  
 eluent : 15% IPA in hexane  
 flow rate : 0.800 ml/min

| No. | Rt    | Area    | Area(%) | Height |
|-----|-------|---------|---------|--------|
| 1   | 7.733 | 3467087 | 50.3    | 307779 |
| 2   | 9.527 | 3420459 | 49.7    | 241565 |
|     |       | 6887546 | 100     | 549344 |

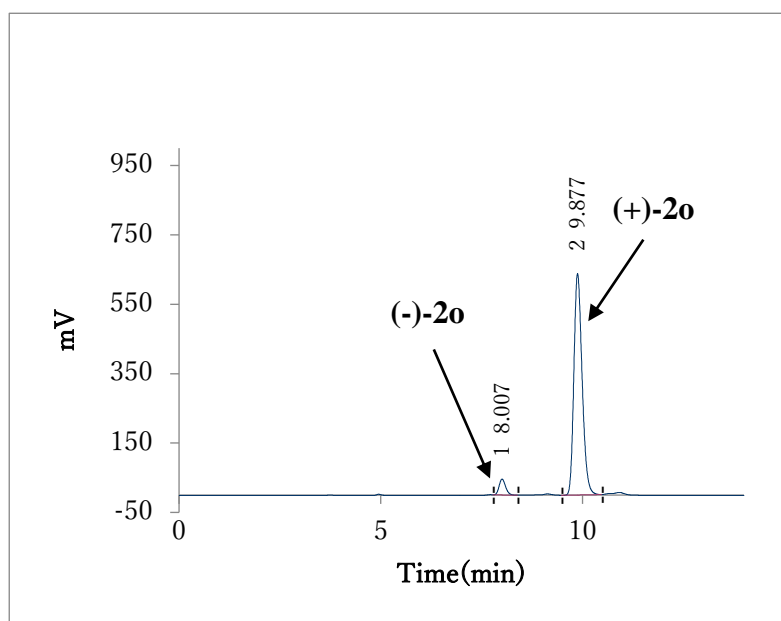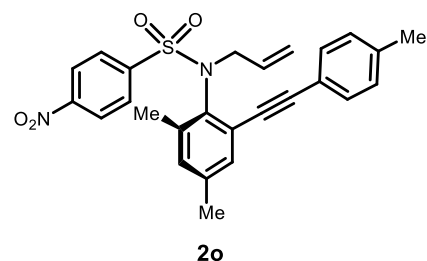

**2o**  
 OD-3  
 eluent : 15% IPA in hexane  
 flow rate : 0.800 ml/min

| No. | Rt    | Area     | Area(%) | Height |
|-----|-------|----------|---------|--------|
| 1   | 8.007 | 511222.6 | 5.3     | 45935  |
| 2   | 9.877 | 9046738  | 94.7    | 638258 |
|     |       | 9557961  | 100     | 684193 |

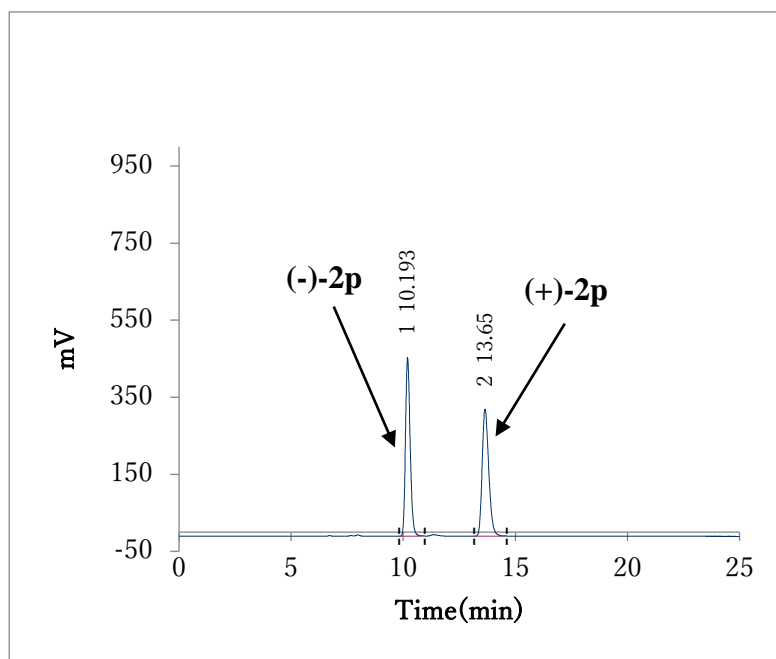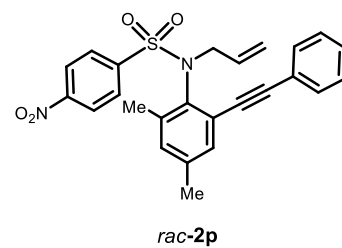

*rac-2p*  
 OD-3  
 eluent : 15% IPA in hexane  
 flow rate : 0.800 ml/min

| No. | Rt     | Area     | Area(%) | Height |
|-----|--------|----------|---------|--------|
| 1   | 10.193 | 6732828  | 50      | 463875 |
| 2   | 13.65  | 6736503  | 50      | 329762 |
|     |        | 13469331 | 100     | 793637 |

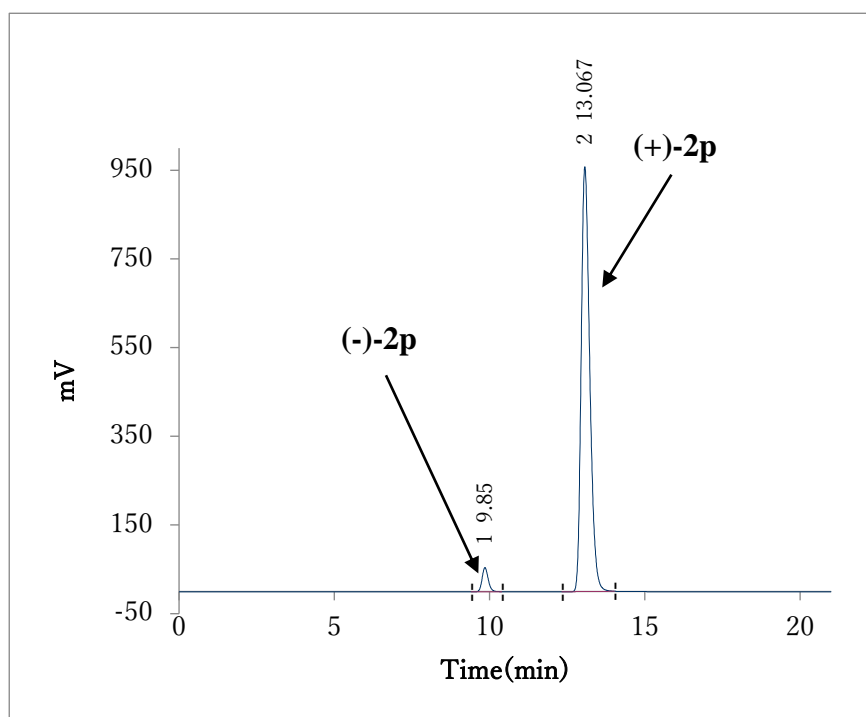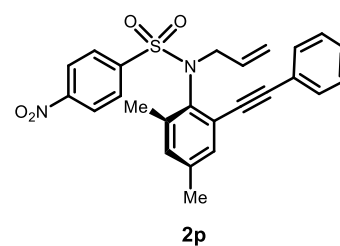

*2p*  
 OD-3  
 eluent : 15% IPA in hexane  
 flow rate : 0.800 ml/min

| No. | Rt     | Area     | Area(%) | Height  |
|-----|--------|----------|---------|---------|
| 1   | 9.85   | 742086.5 | 3.9     | 54500   |
| 2   | 13.067 | 18326906 | 96.1    | 958185  |
|     |        | 19068993 | 100     | 1012685 |

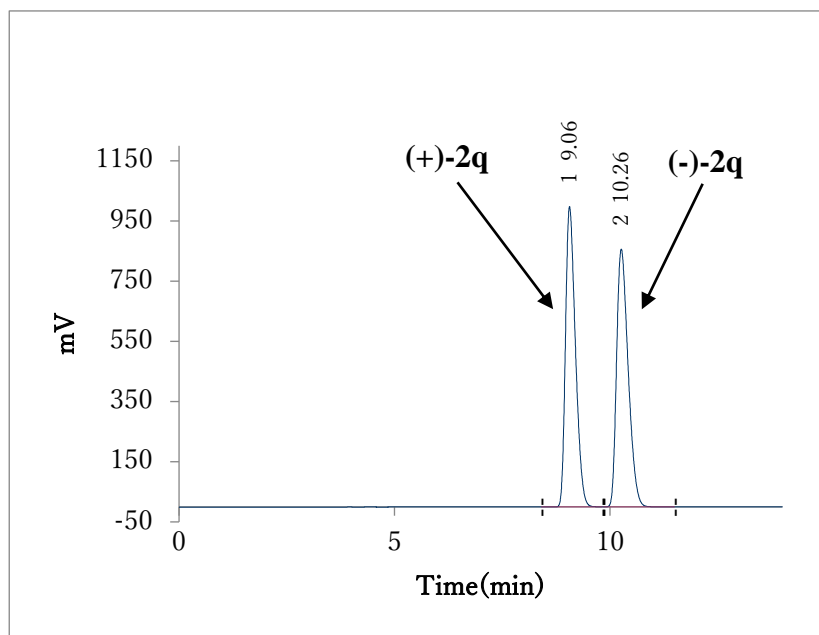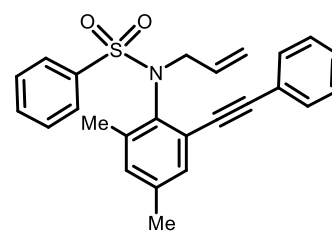

**rac-2q**

AD-H  
eluent : 15% IPA in hexane  
flow rate : 0.800 ml/min

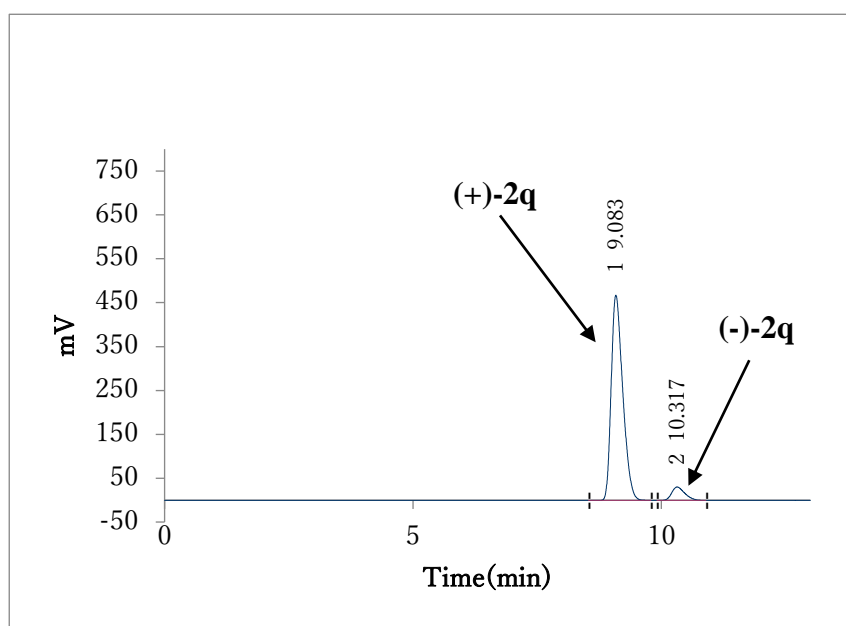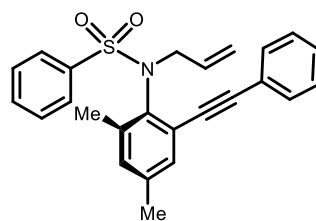

**2q**

AD-H  
eluent : 15% IPA in hexane  
flow rate : 0.800 ml/min



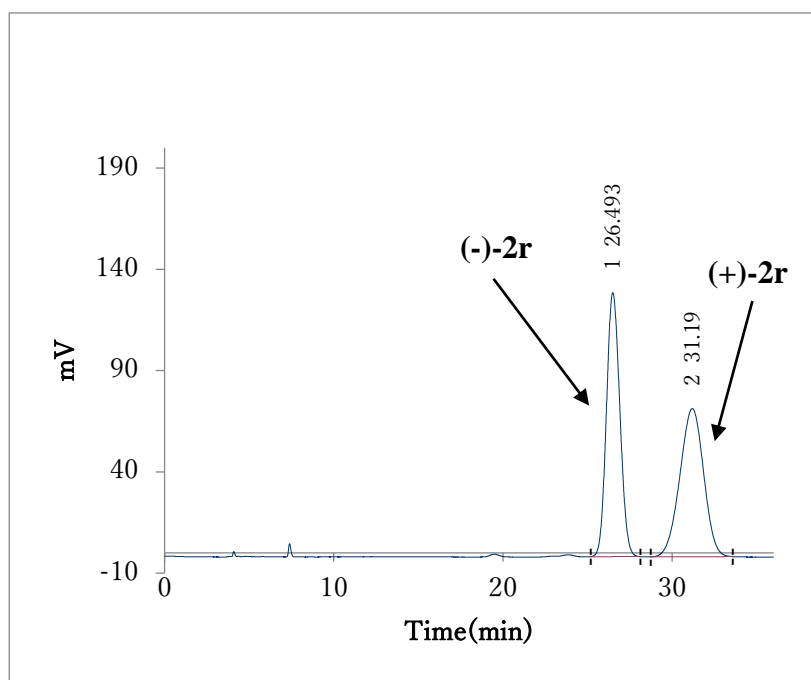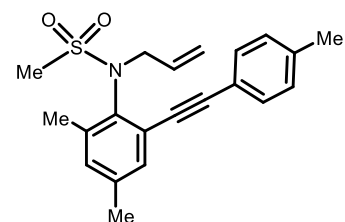

**rac-2r**

AS-H  
eluent : 5% IPA in hexane  
flow rate : 0.800 ml/min

| No. | Rt     | Area     | Area(%) | Height |
|-----|--------|----------|---------|--------|
| 1   | 26.493 | 7173448  | 50.1    | 130271 |
| 2   | 31.19  | 7146590  | 49.9    | 73200  |
|     |        | 14320038 | 100     | 203471 |

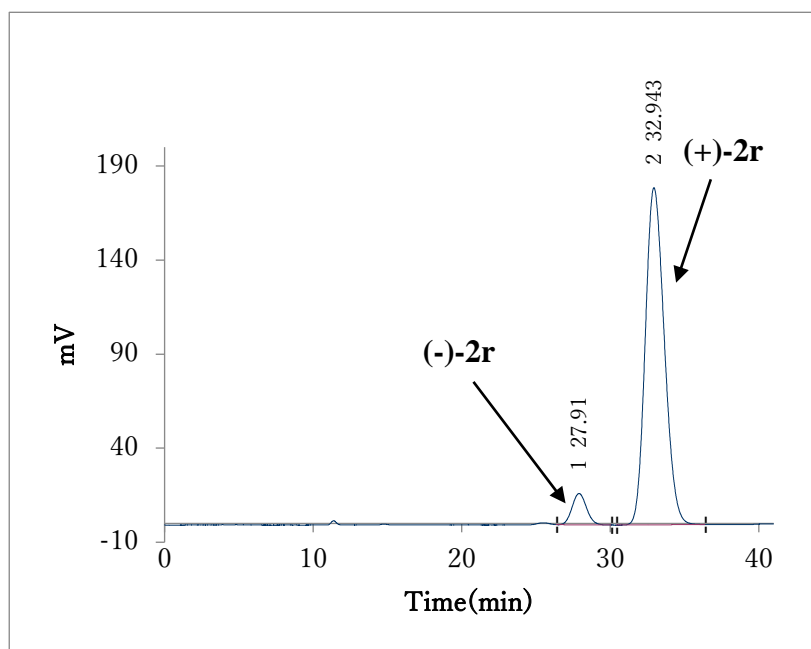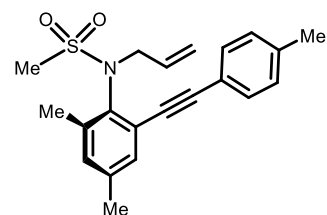

**2r**

AS-H  
eluent : 5% IPA in hexane  
flow rate : 0.800 ml/min

| No. | Rt     | Area     | Area(%) | Height |
|-----|--------|----------|---------|--------|
| 1   | 27.91  | 1123997  | 6.6     | 16653  |
| 2   | 32.943 | 15902586 | 93.4    | 179203 |
|     |        | 17026584 | 100     | 195856 |

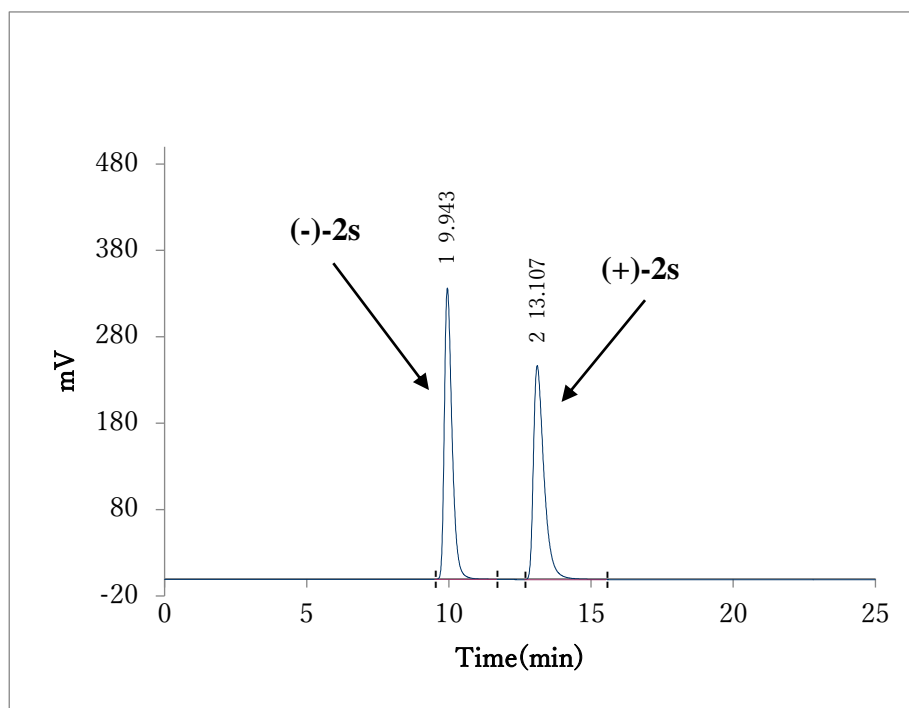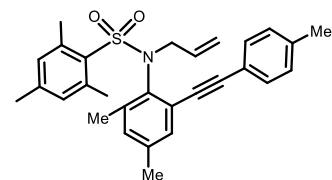

**rac-2s**  
 OD-3  
 eluent : 1% IPA in hexane  
 flow rate : 0.800 ml/min

| No. | Rt     | Area     | Area(%) | Height |
|-----|--------|----------|---------|--------|
| 1   | 9.943  | 6343040  | 49.8    | 337423 |
| 2   | 13.107 | 6385348  | 50.2    | 247913 |
|     |        | 12728388 | 100     | 585336 |

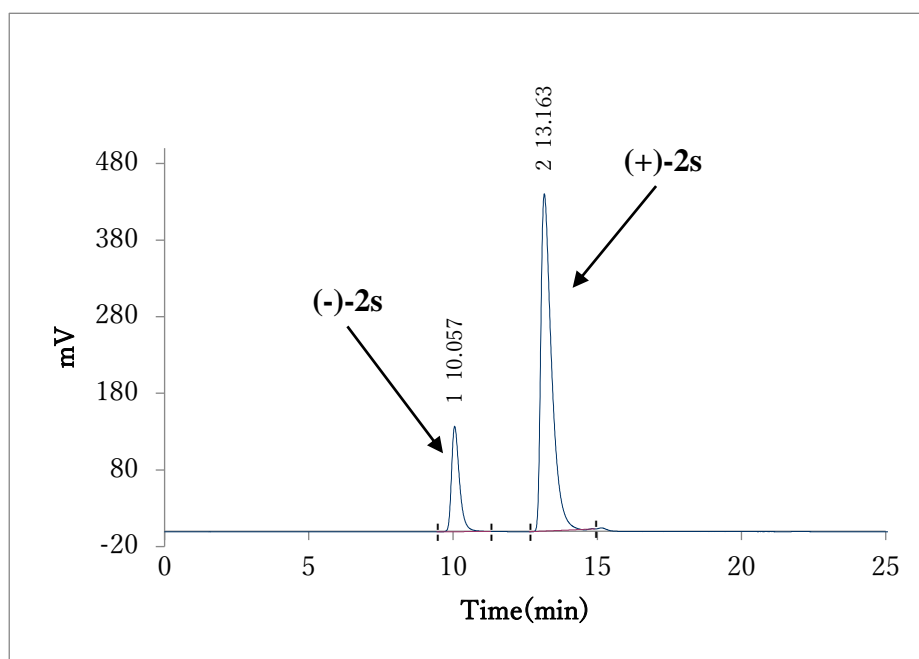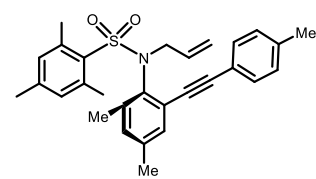

**2s**  
 OD-3  
 eluent : 1% IPA in hexane  
 flow rate : 0.800 ml/min

| No. | Rt     | Area     | Area(%) | Height |
|-----|--------|----------|---------|--------|
| 1   | 10.057 | 2618016  | 18.7    | 137592 |
| 2   | 13.163 | 11401047 | 81.3    | 440314 |
|     |        | 14019063 | 100     | 577906 |

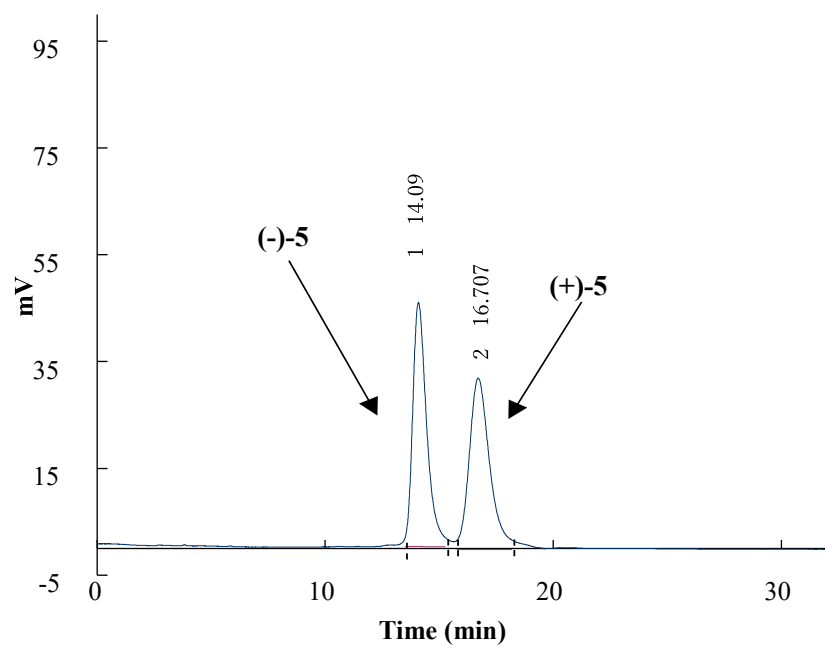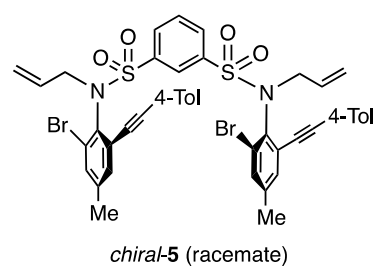

AD-H  
eluent: 10% IPA in hexane  
flow rate: 0.80 min

| No. | Rt     | Area    | Area(%) | Height |
|-----|--------|---------|---------|--------|
| 1   | 14.09  | 1749424 | 50.4    | 43960  |
| 2   | 16.707 | 1724361 | 49.6    | 30351  |
|     |        | 3473784 | 100     | 74311  |

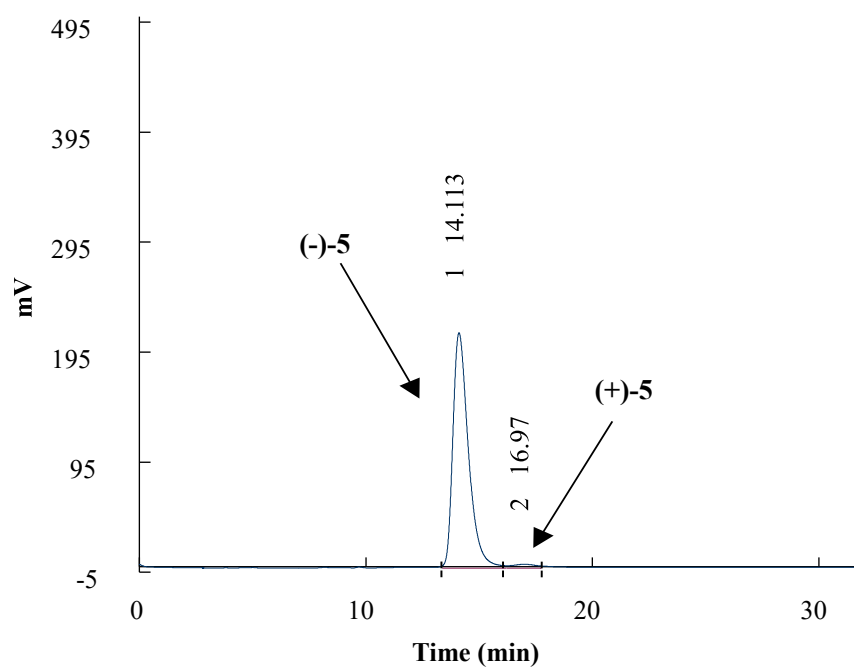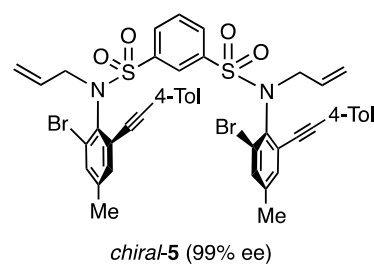

AD-H  
eluent: 10% IPA in hexane  
flow rate: 0.80 min

| No. | Rt     | Area    | Area(%) | Height |
|-----|--------|---------|---------|--------|
| 1   | 14.113 | 9878409 | 99.3    | 211717 |
| 2   | 16.97  | 67729.6 | 0.7     | 1424   |
|     |        | 9946139 | 100     | 213141 |

## X-Ray crystal data of **2o** (CheckCIF/PLATON report)

### checkCIF/PLATON report

Structure factors have been supplied for datablock(s) hk210406a\_a

THIS REPORT IS FOR GUIDANCE ONLY. IF USED AS PART OF A REVIEW PROCEDURE FOR PUBLICATION, IT SHOULD NOT REPLACE THE EXPERTISE OF AN EXPERIENCED CRYSTALLOGRAPHIC REFEREE.

No syntax errors found.      CIF dictionary      Interpreting this report

### Datablock: hk210406a\_a

---

|                        |                 |                                 |
|------------------------|-----------------|---------------------------------|
| Bond precision:        | C-C = 0.0070 Å  | Wavelength=0.71073              |
| Cell:                  | a=10.3010 (16)  | b=9.0527 (14)      c=25.570 (4) |
|                        | alpha=90        | beta=99.171 (5)      gamma=90   |
| Temperature:           | 100 K           |                                 |
|                        | Calculated      | Reported                        |
| Volume                 | 2354.0 (6)      | 2354.0 (6)                      |
| Space group            | P 21            | P 21                            |
| Hall group             | P 2yb           | P 2yb                           |
| Moiety formula         | C26 H24 N2 O4 S | C26 H24 N2 O4 S                 |
| Sum formula            | C26 H24 N2 O4 S | C26 H24 N2 O4 S                 |
| Mr                     | 460.53          | 460.53                          |
| Dx, g cm <sup>-3</sup> | 1.299           | 1.299                           |
| Z                      | 4               | 4                               |
| Mu (mm <sup>-1</sup> ) | 0.173           | 0.173                           |
| F000                   | 968.0           | 968.0                           |
| F000'                  | 968.92          |                                 |
| h, k, lmax             | 12, 10, 30      | 12, 10, 30                      |
| Nref                   | 8327 [ 4452]    | 8236                            |
| Tmin, Tmax             | 0.946, 0.986    | 0.830, 0.990                    |
| Tmin'                  | 0.936           |                                 |

Correction method= # Reported T Limits: Tmin=0.830 Tmax=0.990

AbsCorr = MULTI-SCAN

$$\text{Theta (max)} = 25.027$$

R(reflections)= 0.0511 ( 6426)

```
wR2 (reflections) =
```

0.1191 ( 8236)

$$S = 1.040$$

Npar= 601

The following ALERTS were generated. Each ALERT has the format

```
test-name ALERT alert-type alert-level.
```

Click on the hyperlinks for more details of the test.

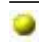

Alert level C

|                                                                 |         |           |
|-----------------------------------------------------------------|---------|-----------|
| PLAT089_ALERT_3_C Poor Data / Parameter Ratio (Zmax < 18) ..... | 7.38    | Note      |
| PLAT220_ALERT_2_C NonSolvent Resd 2 C Ueq(max)/Ueq(min) Range   | 3.4     | Ratio     |
| PLAT340_ALERT_3_C Low Bond Precision on C-C Bonds .....         | 0.00698 | Ang.      |
| PLAT911 ALERT 3 C Missing FCF Refl Between Thmin & STh/L=       | 0.595   | 13 Report |

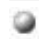

Alert level G

|                   |                                |                              |       |   |     |   |             |
|-------------------|--------------------------------|------------------------------|-------|---|-----|---|-------------|
| PLAT371_ALERT_2_G | Long                           | C(sp2)-C(sp1) Bond           | C6    | - | C7  | . | 1.44 Ang.   |
| PLAT371_ALERT_2_G | Long                           | C(sp2)-C(sp1) Bond           | C8    | - | C9  | . | 1.43 Ang.   |
| PLAT371_ALERT_2_G | Long                           | C(sp2)-C(sp1) Bond           | C32   | - | C33 | . | 1.44 Ang.   |
| PLAT371_ALERT_2_G | Long                           | C(sp2)-C(sp1) Bond           | C34   | - | C35 | . | 1.45 Ang.   |
| PLAT883_ALERT_1_G | No Info/Value for              | _atom_sites_solution_primary | .     |   |     |   | Please Do ! |
| PLAT909_ALERT_3_G | Percentage of I>2sig(I)        | Data at Theta(Max)           | Still |   |     |   | 47% Note    |
| PLAT910_ALERT_3_G | Missing # of FCF Reflection(s) | Below Theta(Min).            |       |   |     |   | 2 Note      |
| PLAT933_ALERT_2_G | Number of HKL-OMIT Records in  | Embedded .res File           |       |   |     |   | 1 Note      |
| PLAT978_ALERT_2_G | Number C-C Bonds with Positive | Residual Density.            |       |   |     |   | 0 Info      |
| PLAT992_ALERT_5_G | Repd & Actual reflns number    | gt Values Differ by          |       |   |     |   | 3 Check     |

0 **ALERT level A** = Most likely a serious problem - resolve or explain

0 **ALERT level B** = A potentially serious problem, consider carefully

4 **ALERT level C** = Check. Ensure it is not caused by an omission or oversight

10 **ALERT level G** = General information/check it is not something unexpected

1 ALERT type 1 CIF construction/syntax error, inconsistent or missing data

7 ALERT type 2 Indicator that the structure model may be wrong or deficient

5 ALERT type 3 Indicator that the structure quality may be low  
0 ALERT type 4 Improvement, methodology, query or suggestion  
1 ALERT type 5 Informative message, check

---

It is advisable to attempt to resolve as many as possible of the alerts in all categories. Often the minor alerts point to easily fixed oversights, errors and omissions in your CIF or refinement strategy, so attention to these fine details can be worthwhile. In order to resolve some of the more serious problems it may be necessary to carry out additional measurements or structure refinements. However, the purpose of your study may justify the reported deviations and the more serious of these should normally be commented upon in the discussion or experimental section of a paper or in the "special\_details" fields of the CIF. checkCIF was carefully designed to identify outliers and unusual parameters, but every test has its limitations and alerts that are not important in a particular case may appear. Conversely, the absence of alerts does not guarantee there are no aspects of the results needing attention. It is up to the individual to critically assess their own results and, if necessary, seek expert advice.

#### **Publication of your CIF in IUCr journals**

A basic structural check has been run on your CIF. These basic checks will be run on all CIFs submitted for publication in IUCr journals (*Acta Crystallographica*, *Journal of Applied Crystallography*, *Journal of Synchrotron Radiation*); however, if you intend to submit to *Acta Crystallographica Section C* or *E* or *IUCrData*, you should make sure that full publication checks are run on the final version of your CIF prior to submission.

#### **Publication of your CIF in other journals**

Please refer to the *Notes for Authors* of the relevant journal for any special instructions relating to CIF submission.

---

**PLATON version of 12/09/2022; check.def file version of 09/08/2022**

Datablock hk210406a\_a - ellipsoid plot

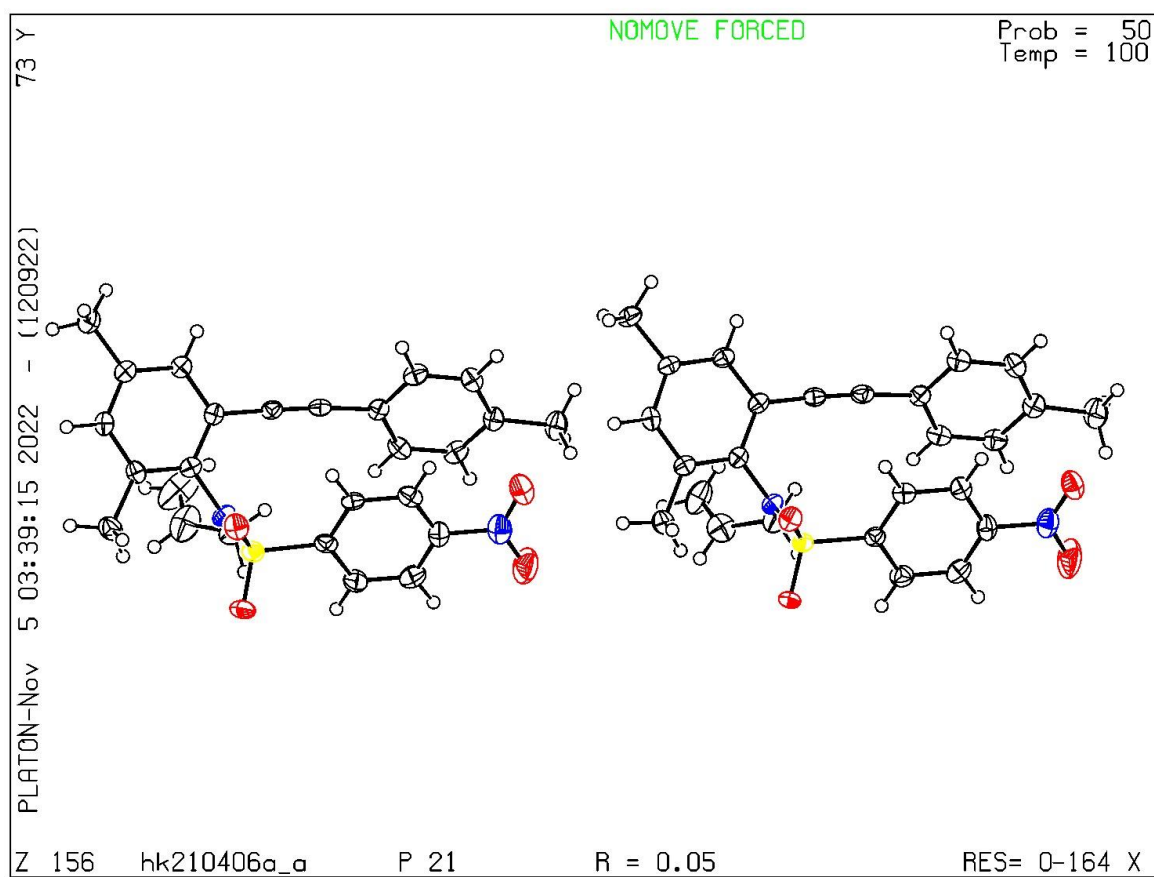



## Evaluation of rotational barrier of **2i**, **2r**

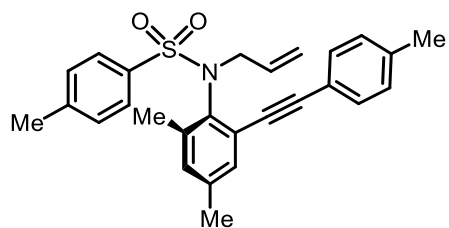

**2i**

$\Delta G^\ddagger = 28.7$  kcal/mol

| 60 °C    |        |
|----------|--------|
| time (h) | ee (%) |
| 0        | 87     |
| 3        | 85     |
| 6        | 83     |
| 12       | 79     |
| 30       | 69     |
| 42       | 63     |

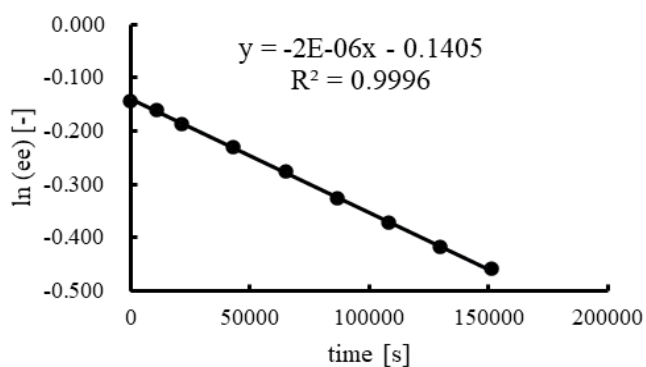

| temp (°C) | k (s <sup>-1</sup> )  | $\Delta G^\ddagger$ (kcal/mol) | t <sub>1/2</sub> (days) |
|-----------|-----------------------|--------------------------------|-------------------------|
| 60        | 1.06×10 <sup>-6</sup> | 28.7                           | 7.6                     |

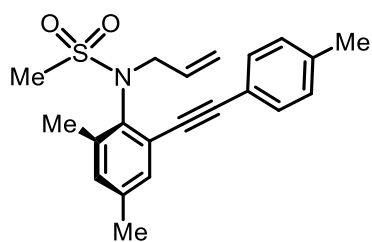

**2r**

$\Delta G^\ddagger = 28.3$  kcal/mol

| 60 °C    |        |
|----------|--------|
| time (h) | ee (%) |
| 0        | 87     |
| 3        | 84     |
| 6        | 80     |
| 12       | 74     |
| 30       | 58     |
| 33       | 57     |

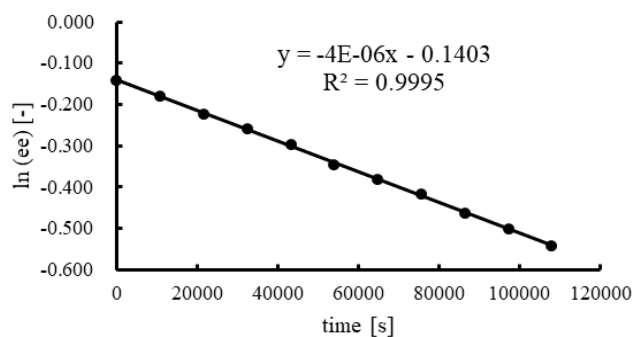

| temp (°C) | k (s <sup>-1</sup> )  | $\Delta G^\ddagger$ (kcal/mol) | t <sub>1/2</sub> (days) |
|-----------|-----------------------|--------------------------------|-------------------------|
| 60        | 1.89×10 <sup>-6</sup> | 28.3                           | 4.3                     |
